# Supplementary material
Source: PubMed Central journal article supplement (PMC5962029)
Supplement: NIHMS960153-supplement.pdf [file NIHMS960153-supplement.pdf]

## Supplementary Information

### Synthesis and antiproliferative activity of derivatives of the phyllanthusmin class of aryl-naphthalene lignan lactones

John L. Woodard, Andrew C. Huntsman, Pratiq A. Patel, Hee-Byung Chai, Ragu Kanagasabai, Soumendrakrishna Karmahapatra, Alexandria N. Young, Yulin Ren, Denisse Herrera, Jack C. Yalowich, A. Douglas Kinghorn, Joanna E. Burdette, James R. Fuchs\*

|                                                      |            |
|------------------------------------------------------|------------|
| <b>Additional Biological Data:</b>                   | <b>S1</b>  |
| <b><sup>1</sup>H and <sup>13</sup>C NMR Spectra:</b> | <b>S2</b>  |
| <b>Additional NMR Spectra of 5 and 16:</b>           | <b>S43</b> |
| <b>HPLC Traces for Tested Compounds:</b>             | <b>S51</b> |

#### MDA-MB-435 and MDA-MB-231 cell proliferation assays

The cytotoxicity of the tested compounds was screened against MDA-MB-435 and MDA-MB-231 cell lines using the previously reported protocol:<sup>1</sup>

| <i>Cmpd</i> | <i>Carbohydrate</i> | <i>Substitution</i> | <i>MDA-MB-435</i> | <i>MDA-MB-231</i> |
|-------------|---------------------|---------------------|-------------------|-------------------|
| 6a          | L-arabinose         | -OAc                | 0.14              | 1.0               |
| 6b          | L-arabinose         | -OH                 | NT                | NT                |
| 6c          | L-arabinose         | -OMe                | 0.14              | 0.65              |
| 7a          | D-xylose            | -OAc                | 0.23              | 5.1               |
| 7b          | D-xylose            | -OH                 | NT                | NT                |
| 7c          | D-xylose            | -OMe                | NT                | NT                |
| 8a          | D-glucose           | -OAc                | 0.040             | 2.3               |
| 8b          | D-glucose           | -OH                 | NT                | NT                |
| 9a          | D-galactose         | -OAc                | 0.41              | 1.2               |
| 9b          | D-galactose         | -OH                 | NT                | NT                |
| 10          | D-arabinose         | -OAc                | 0.50              | 2.2               |
| 11          | lactose             | -OAc                | >10               | >10               |
| 12          | D-xylose            | -OMe                | NT                | NT                |
| 13          | L-arabinose         | -OAc                | NT                | NT                |
| 17          | L-arabinose         | -OAc                | NT                | NT                |
| 18          | L-arabinose         | -OAc                | NT                | NT                |

1.) Guo B, Onakpa MM, Huang X-J, Santarsiero BD, Chen W-L, Zhao M, Zhang X-Q, Swanson SM, Burdette JE, Che C-T. Di-nor- and 17-nor-pimaranes from *Icacina trichantha*. *J Nat Prod.* 2016;79:1815–1821.

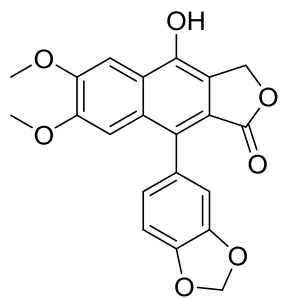

Diphyllin (5)

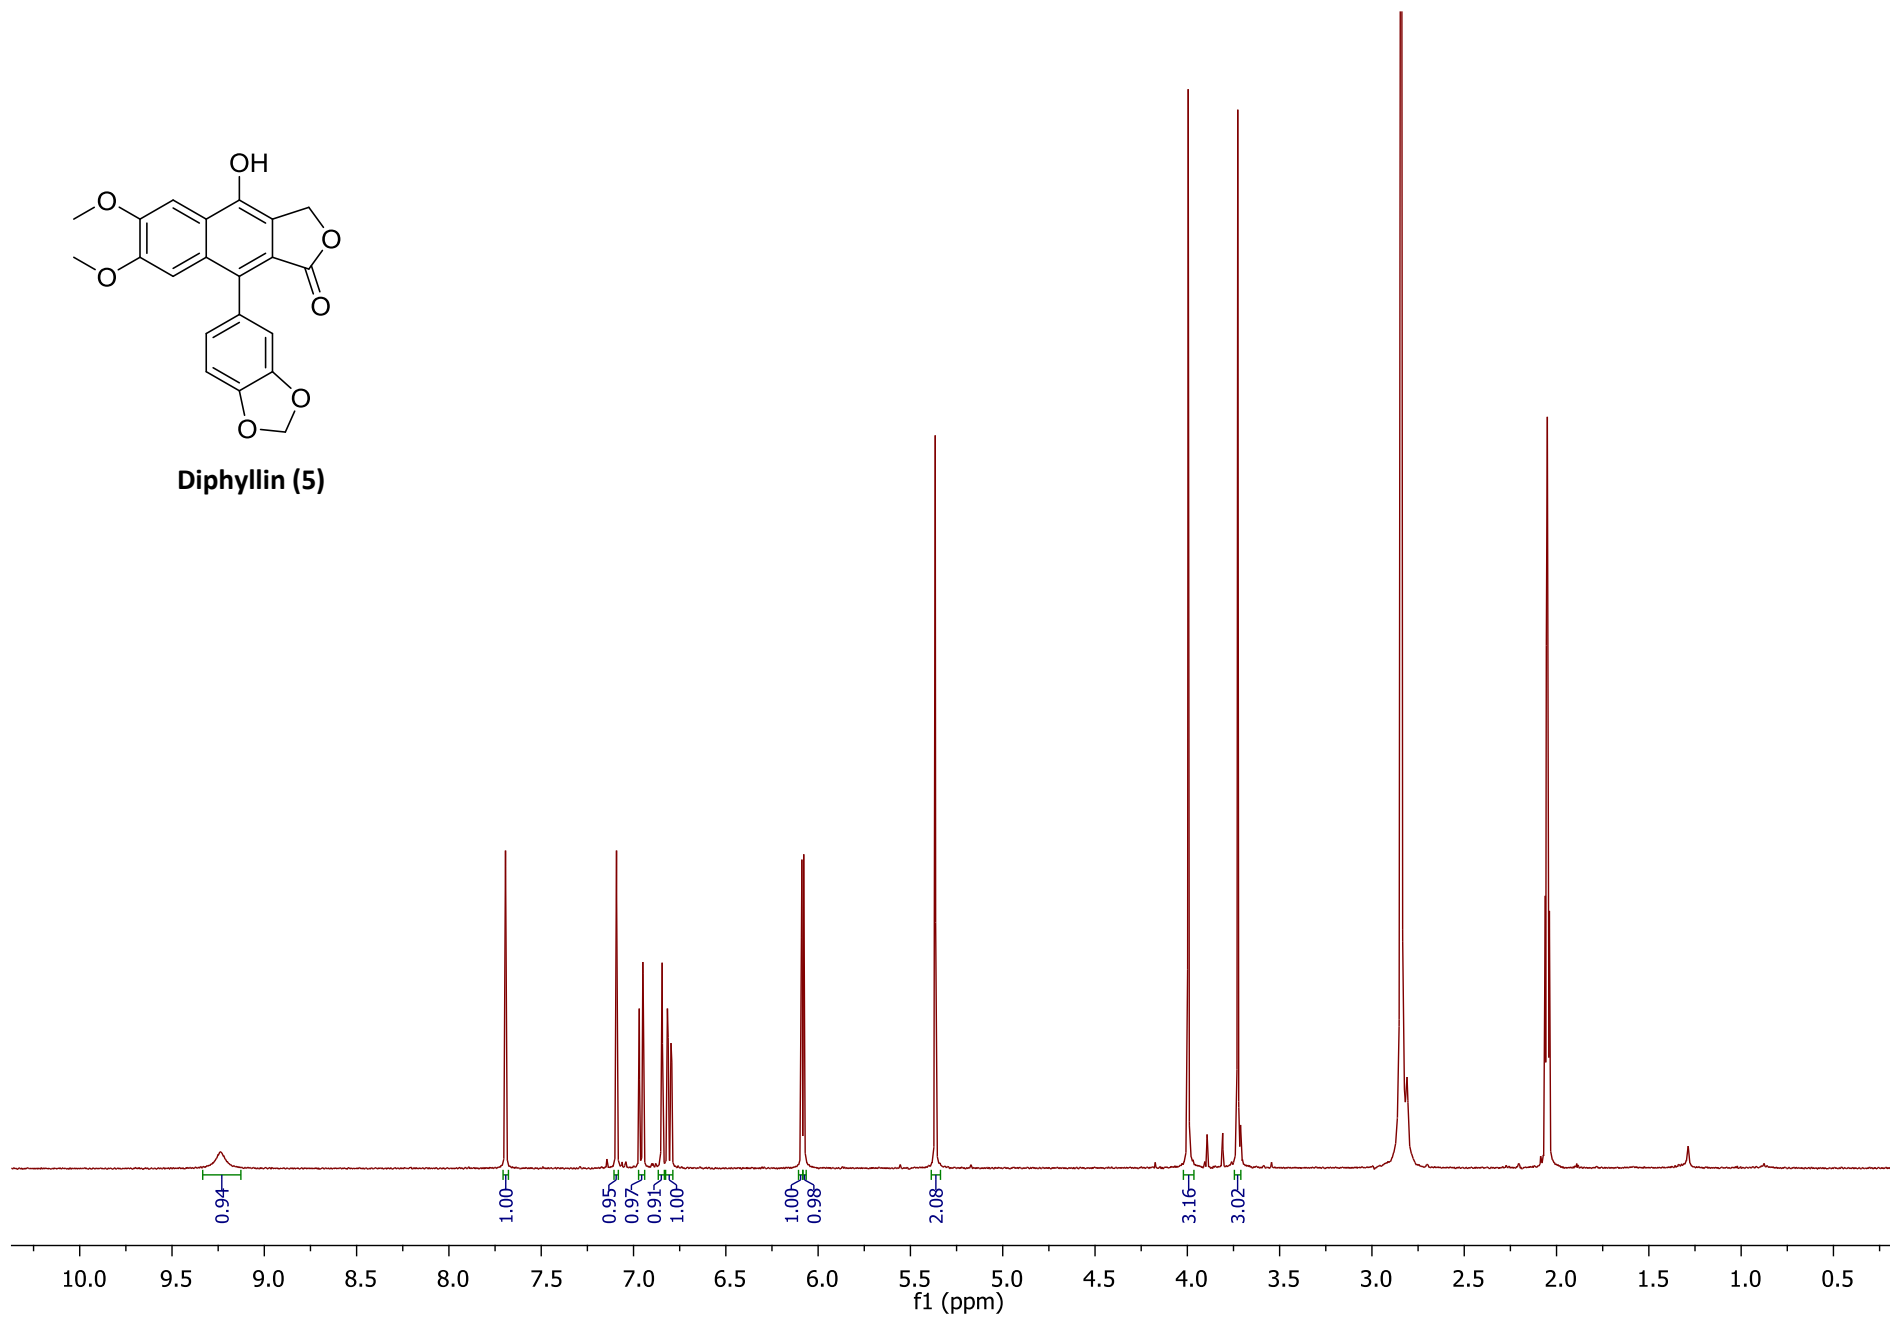

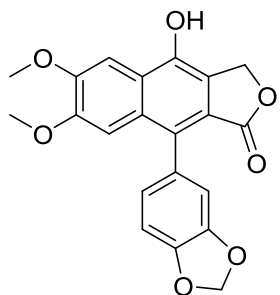

Diphyllin (5)

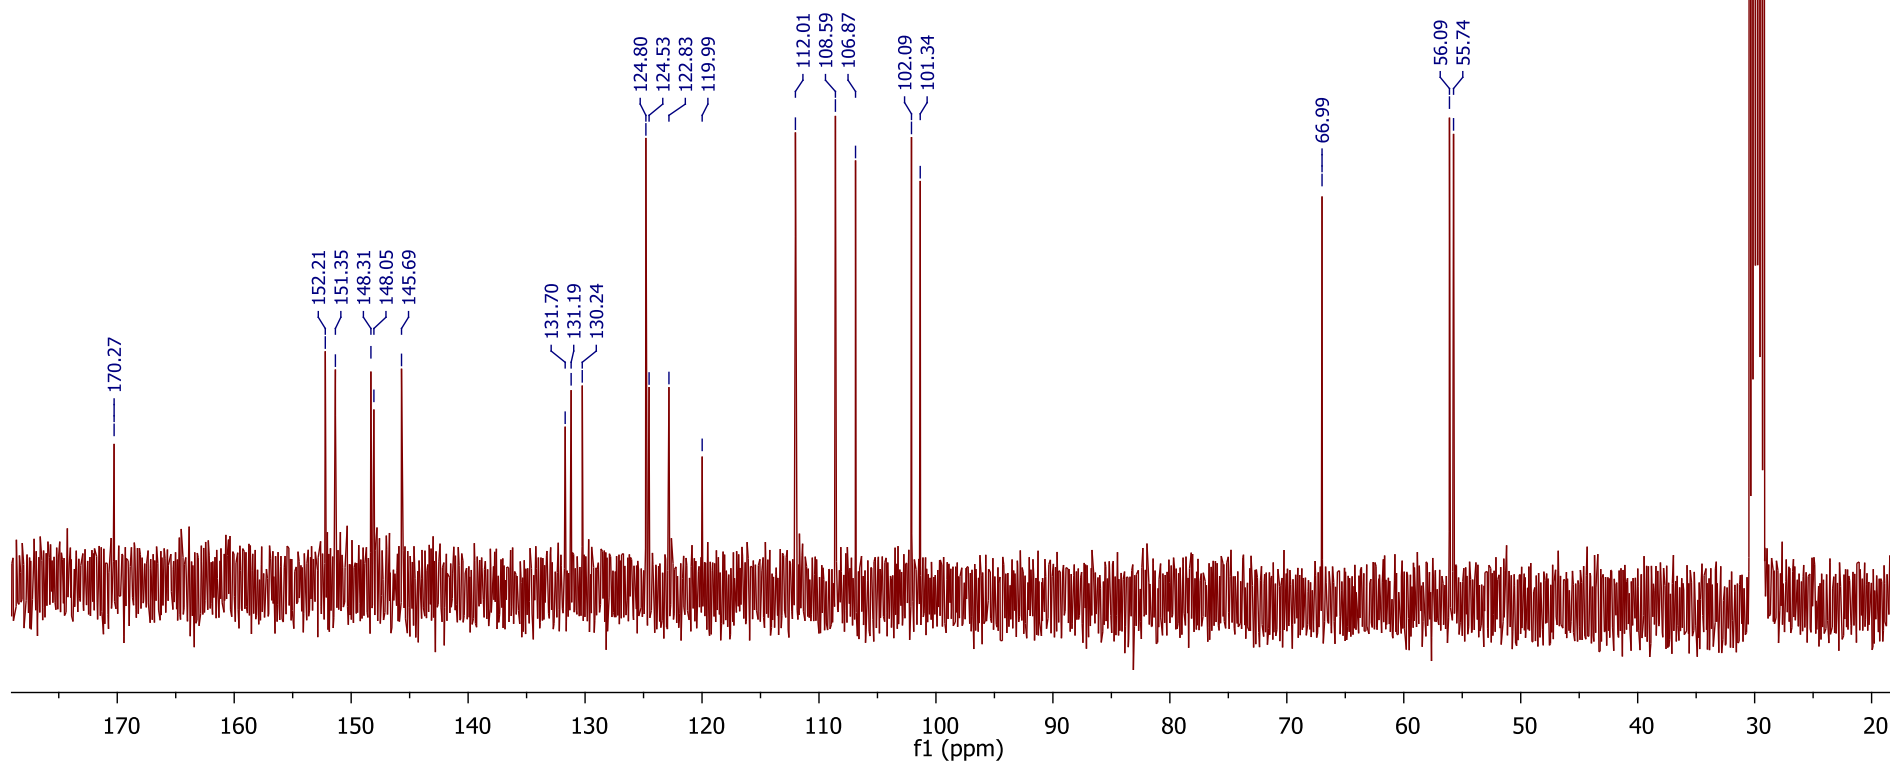

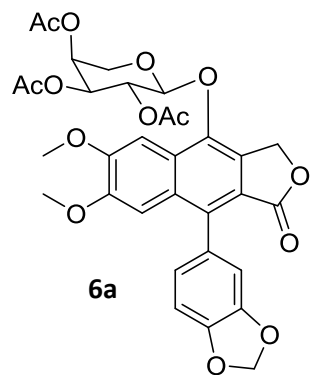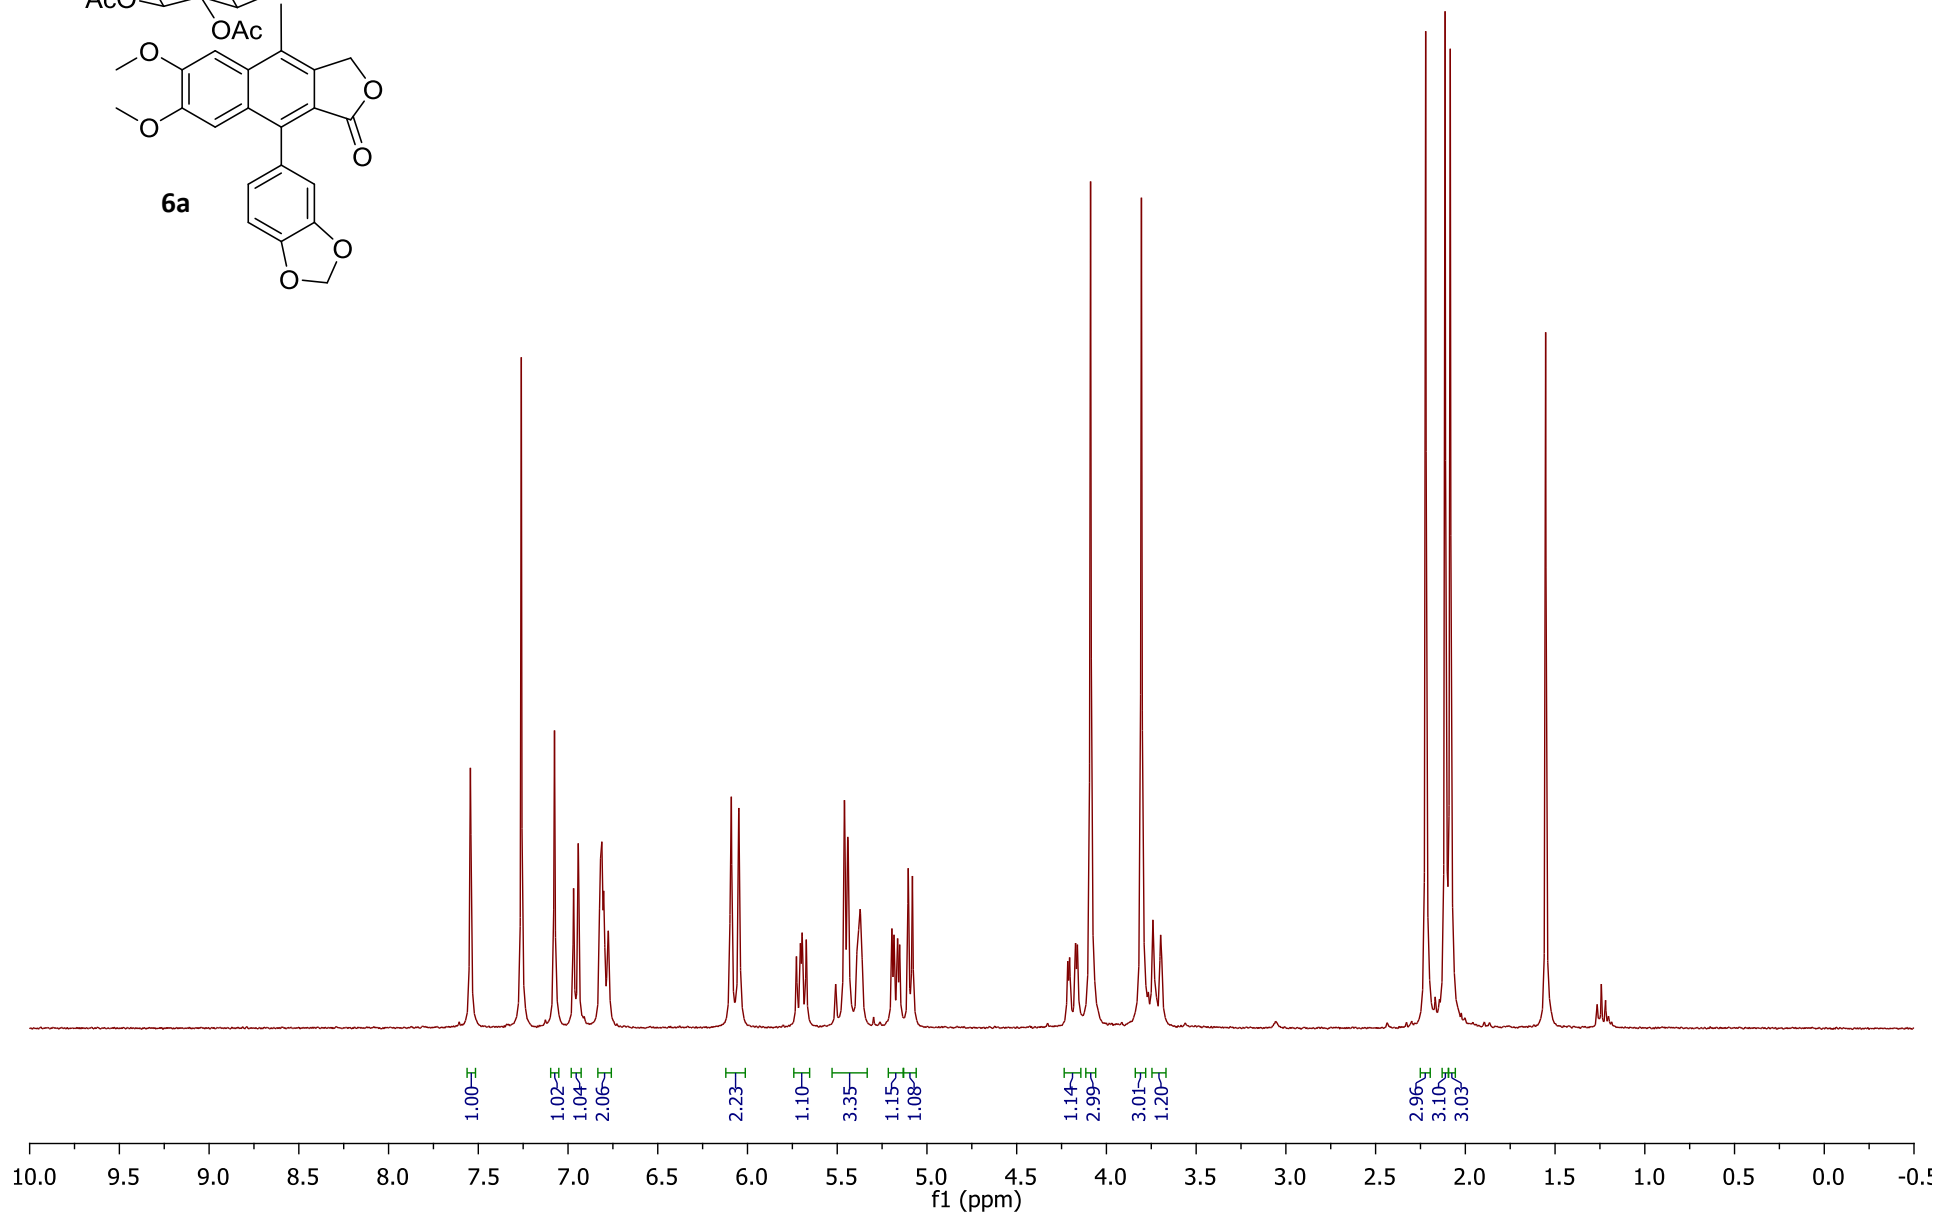

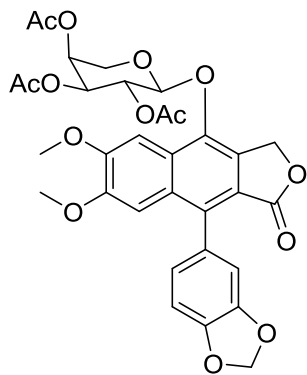

6a

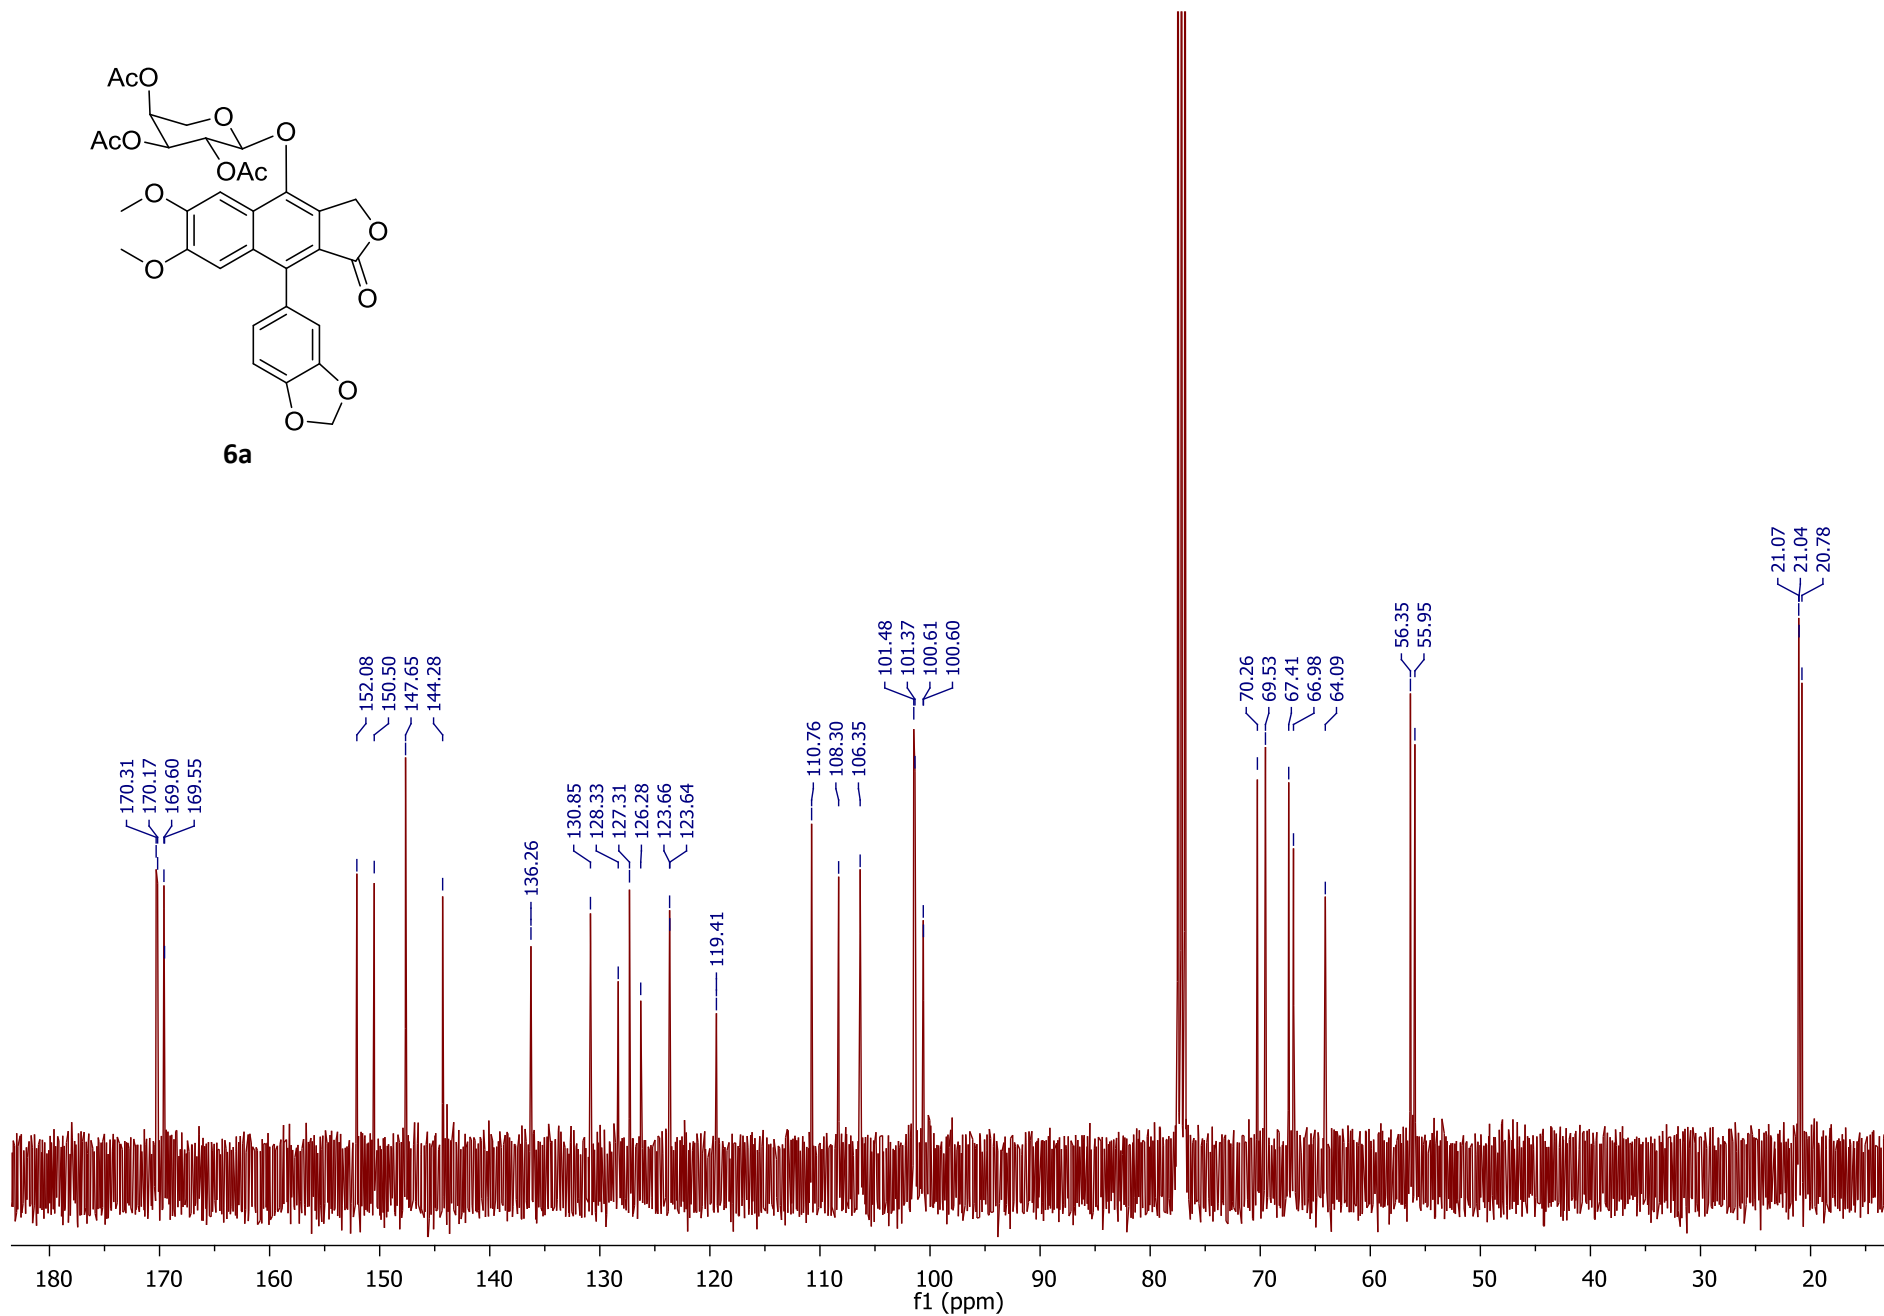

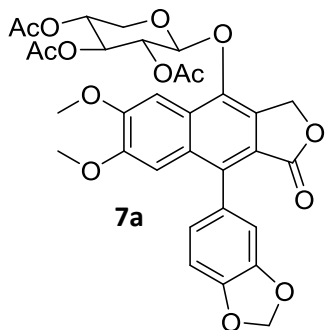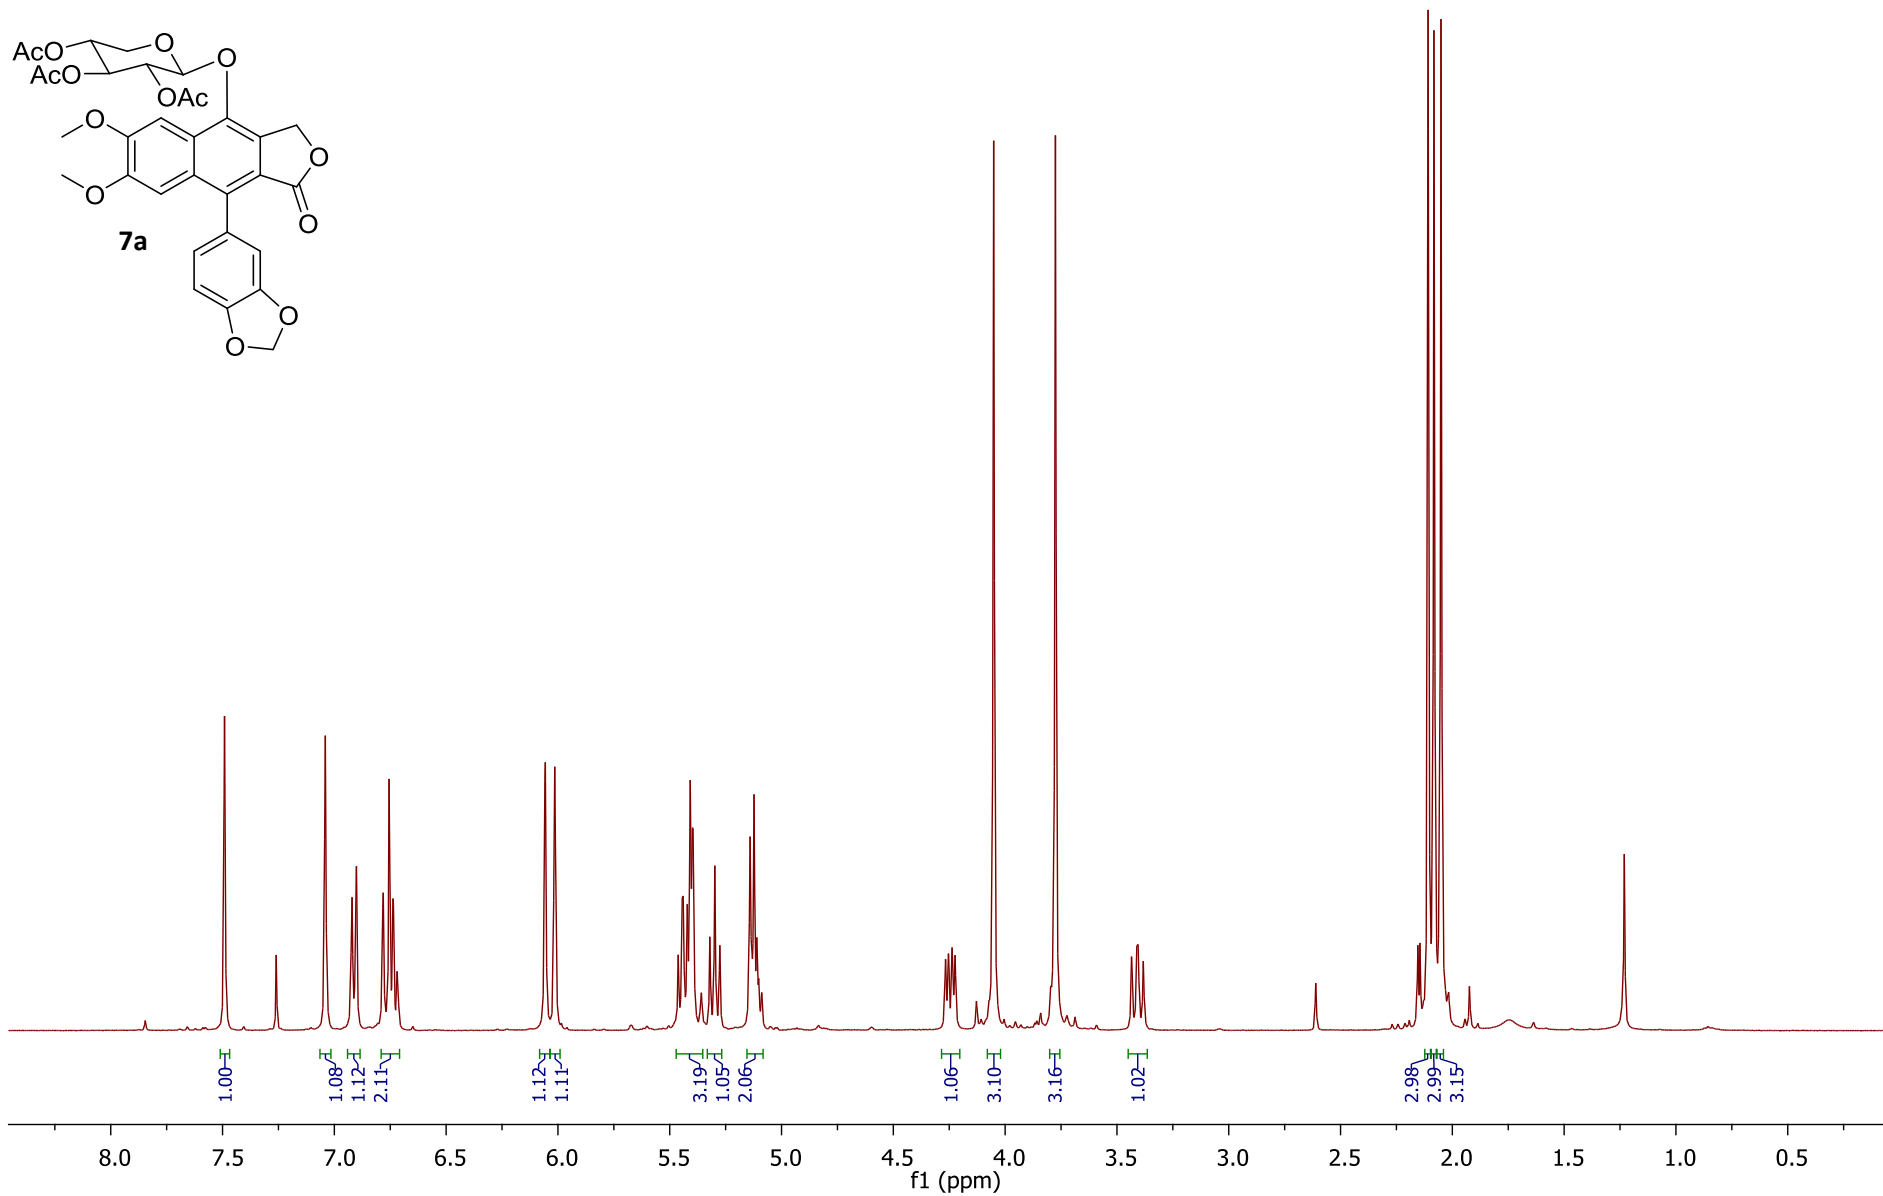

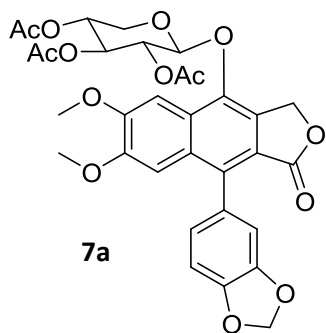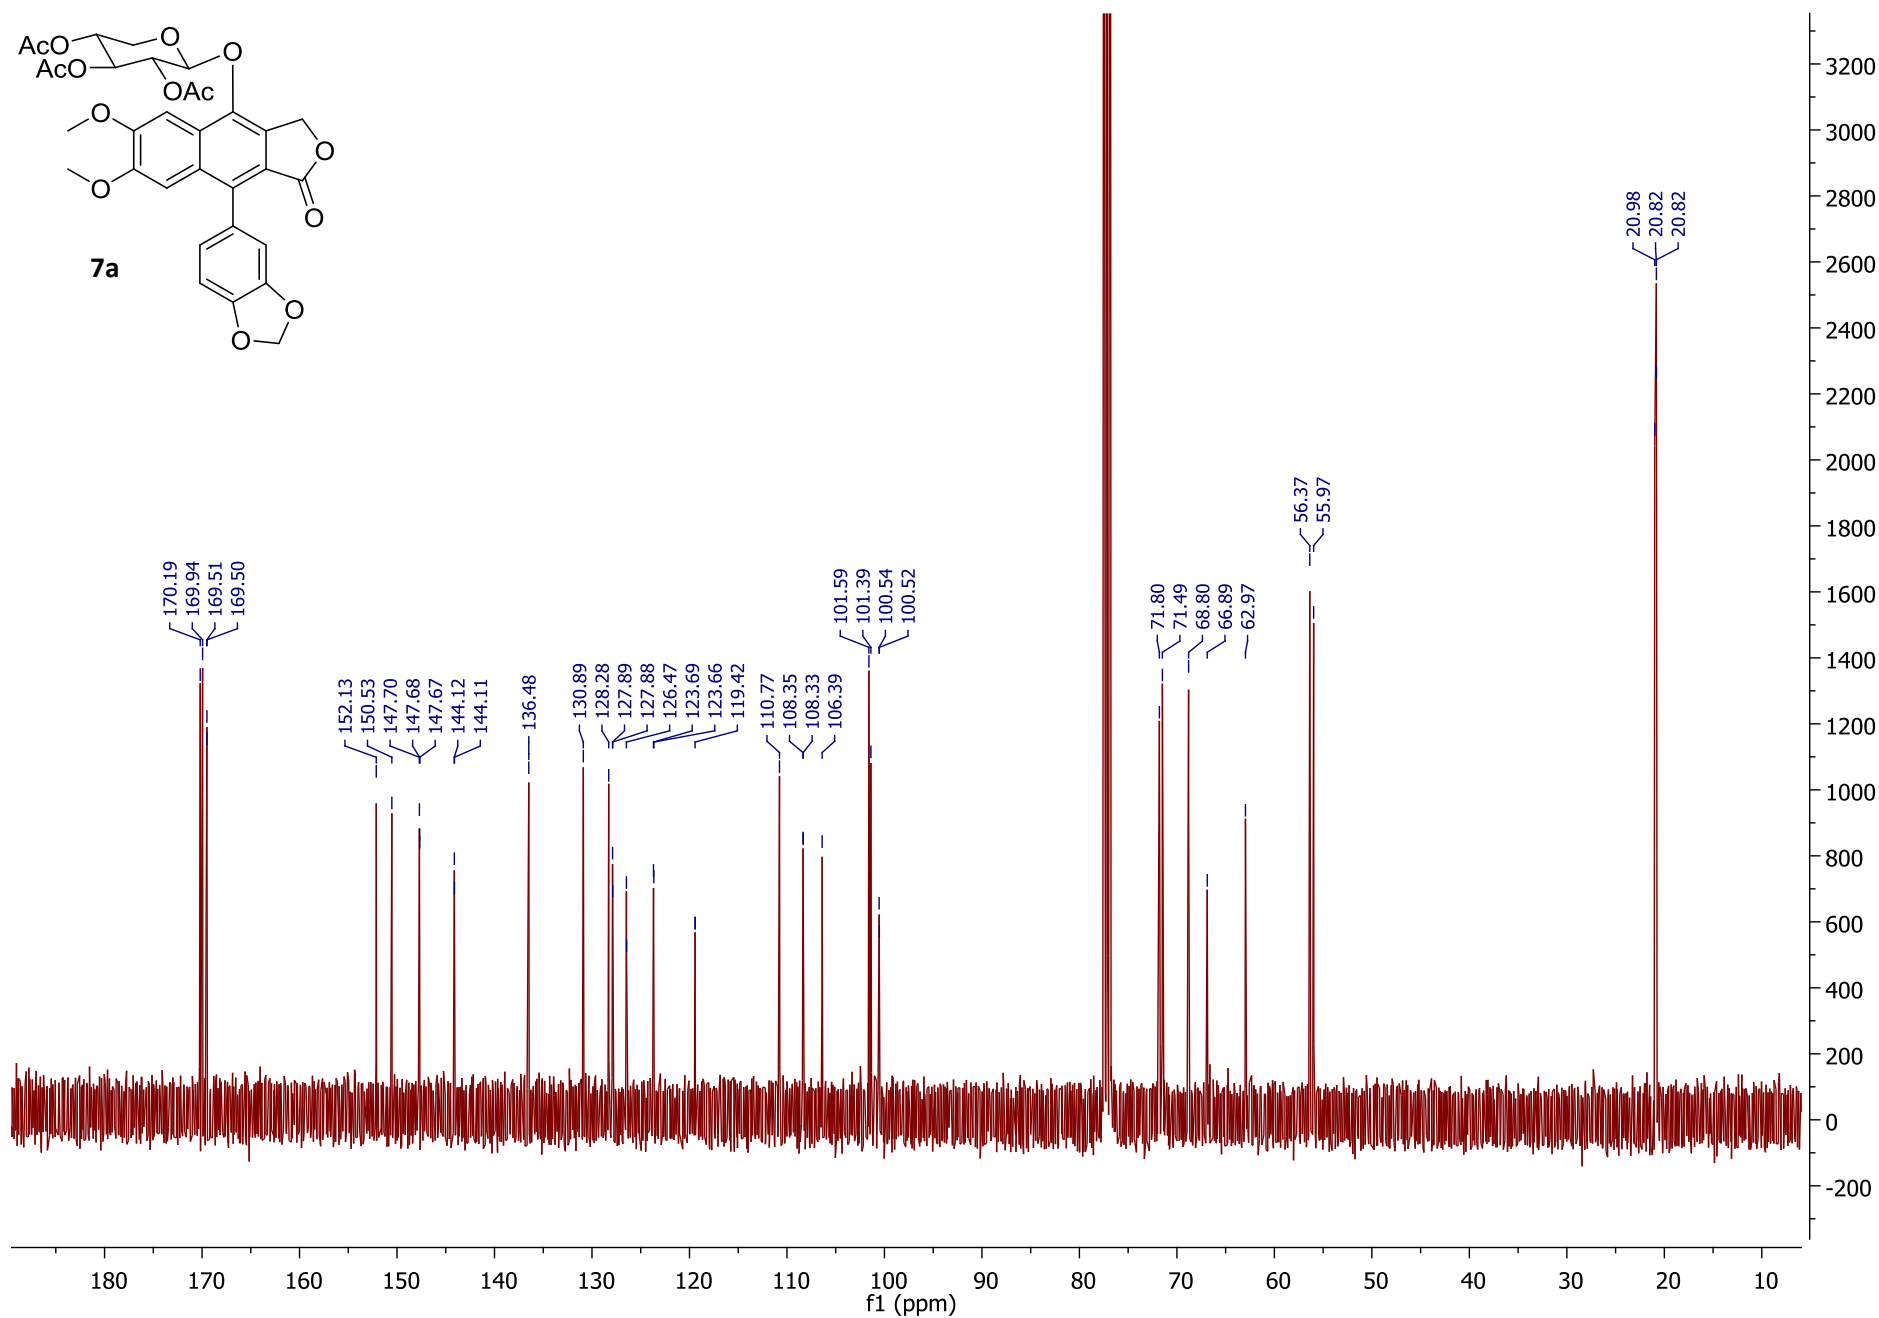

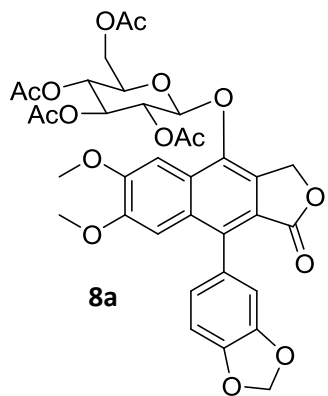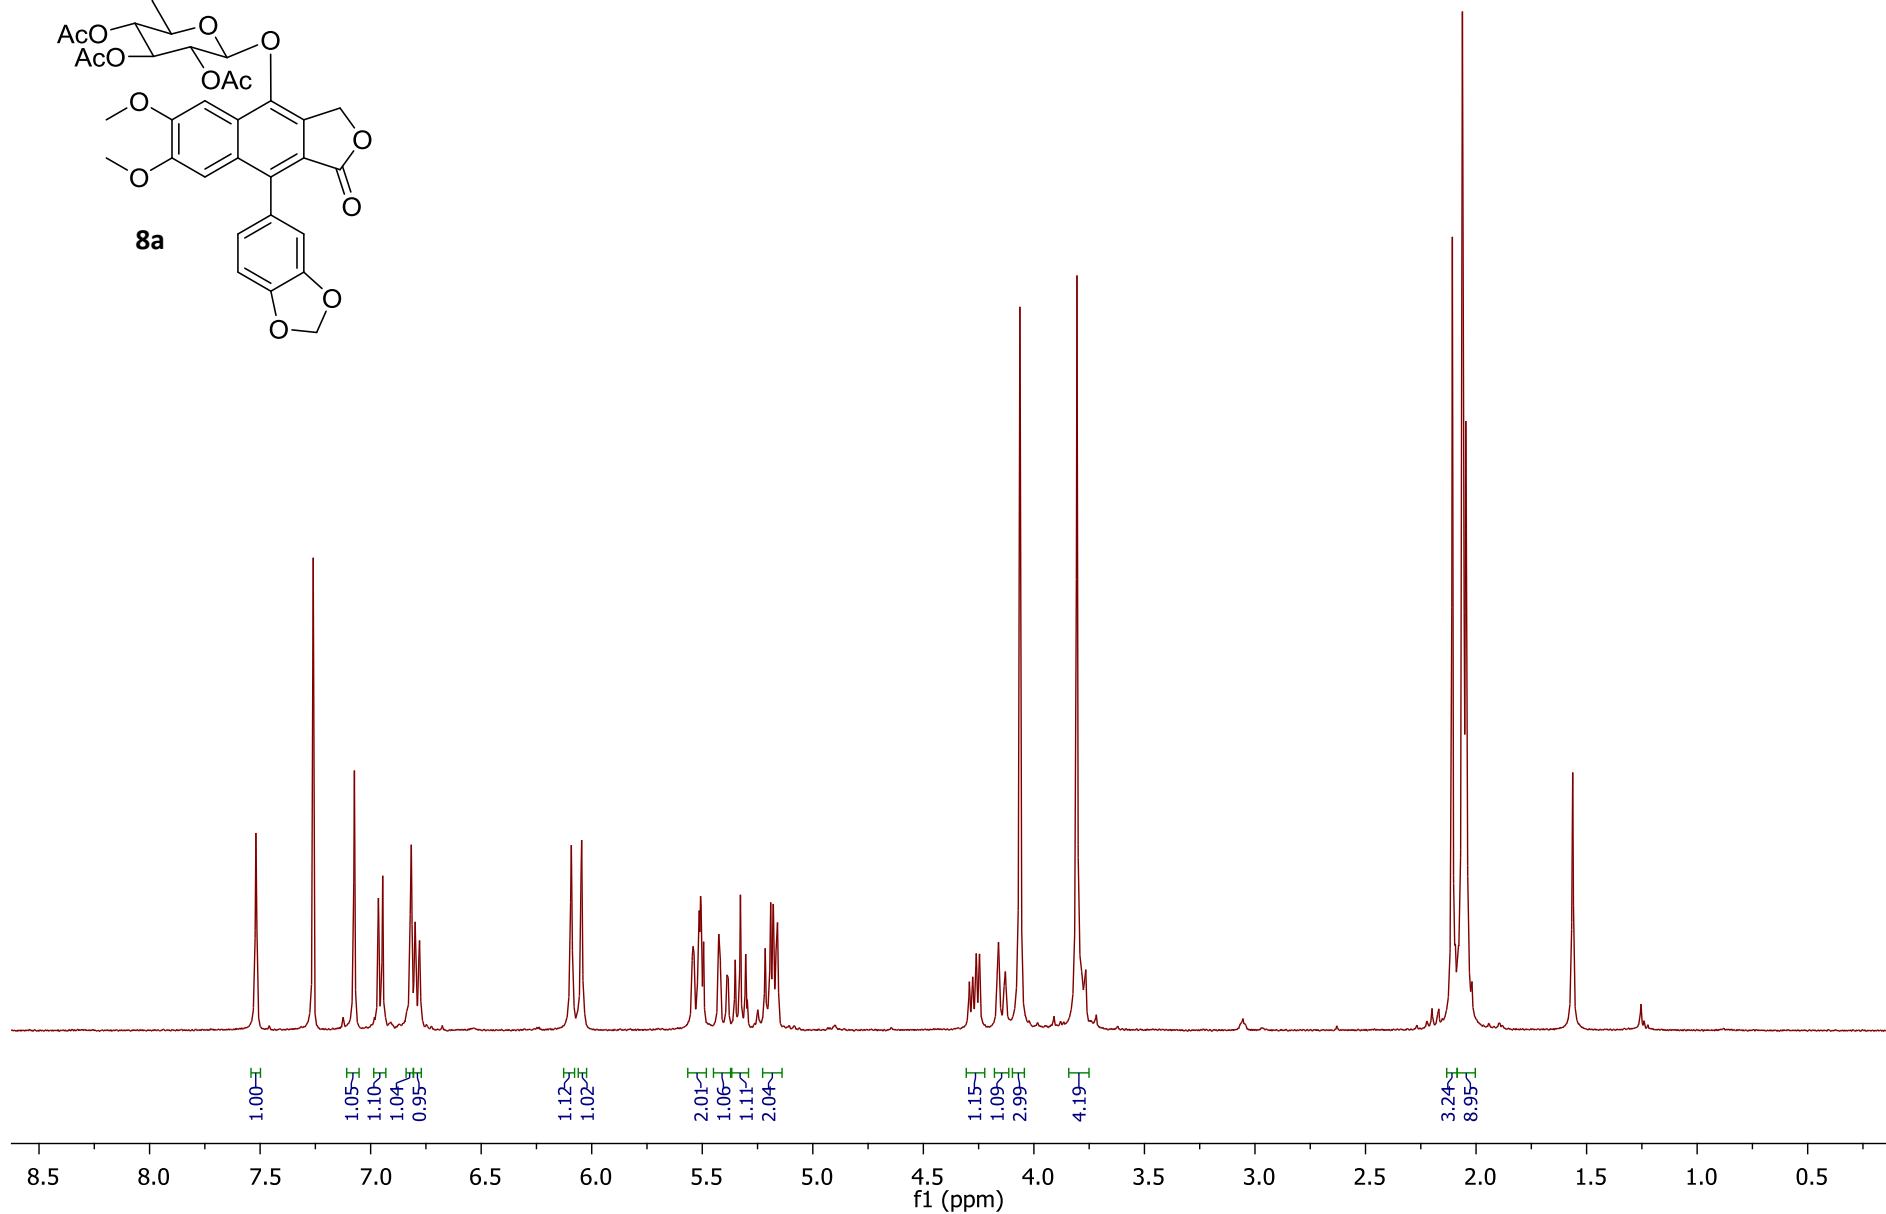



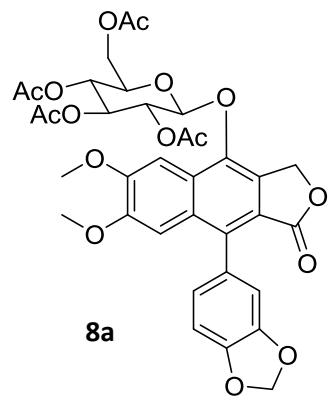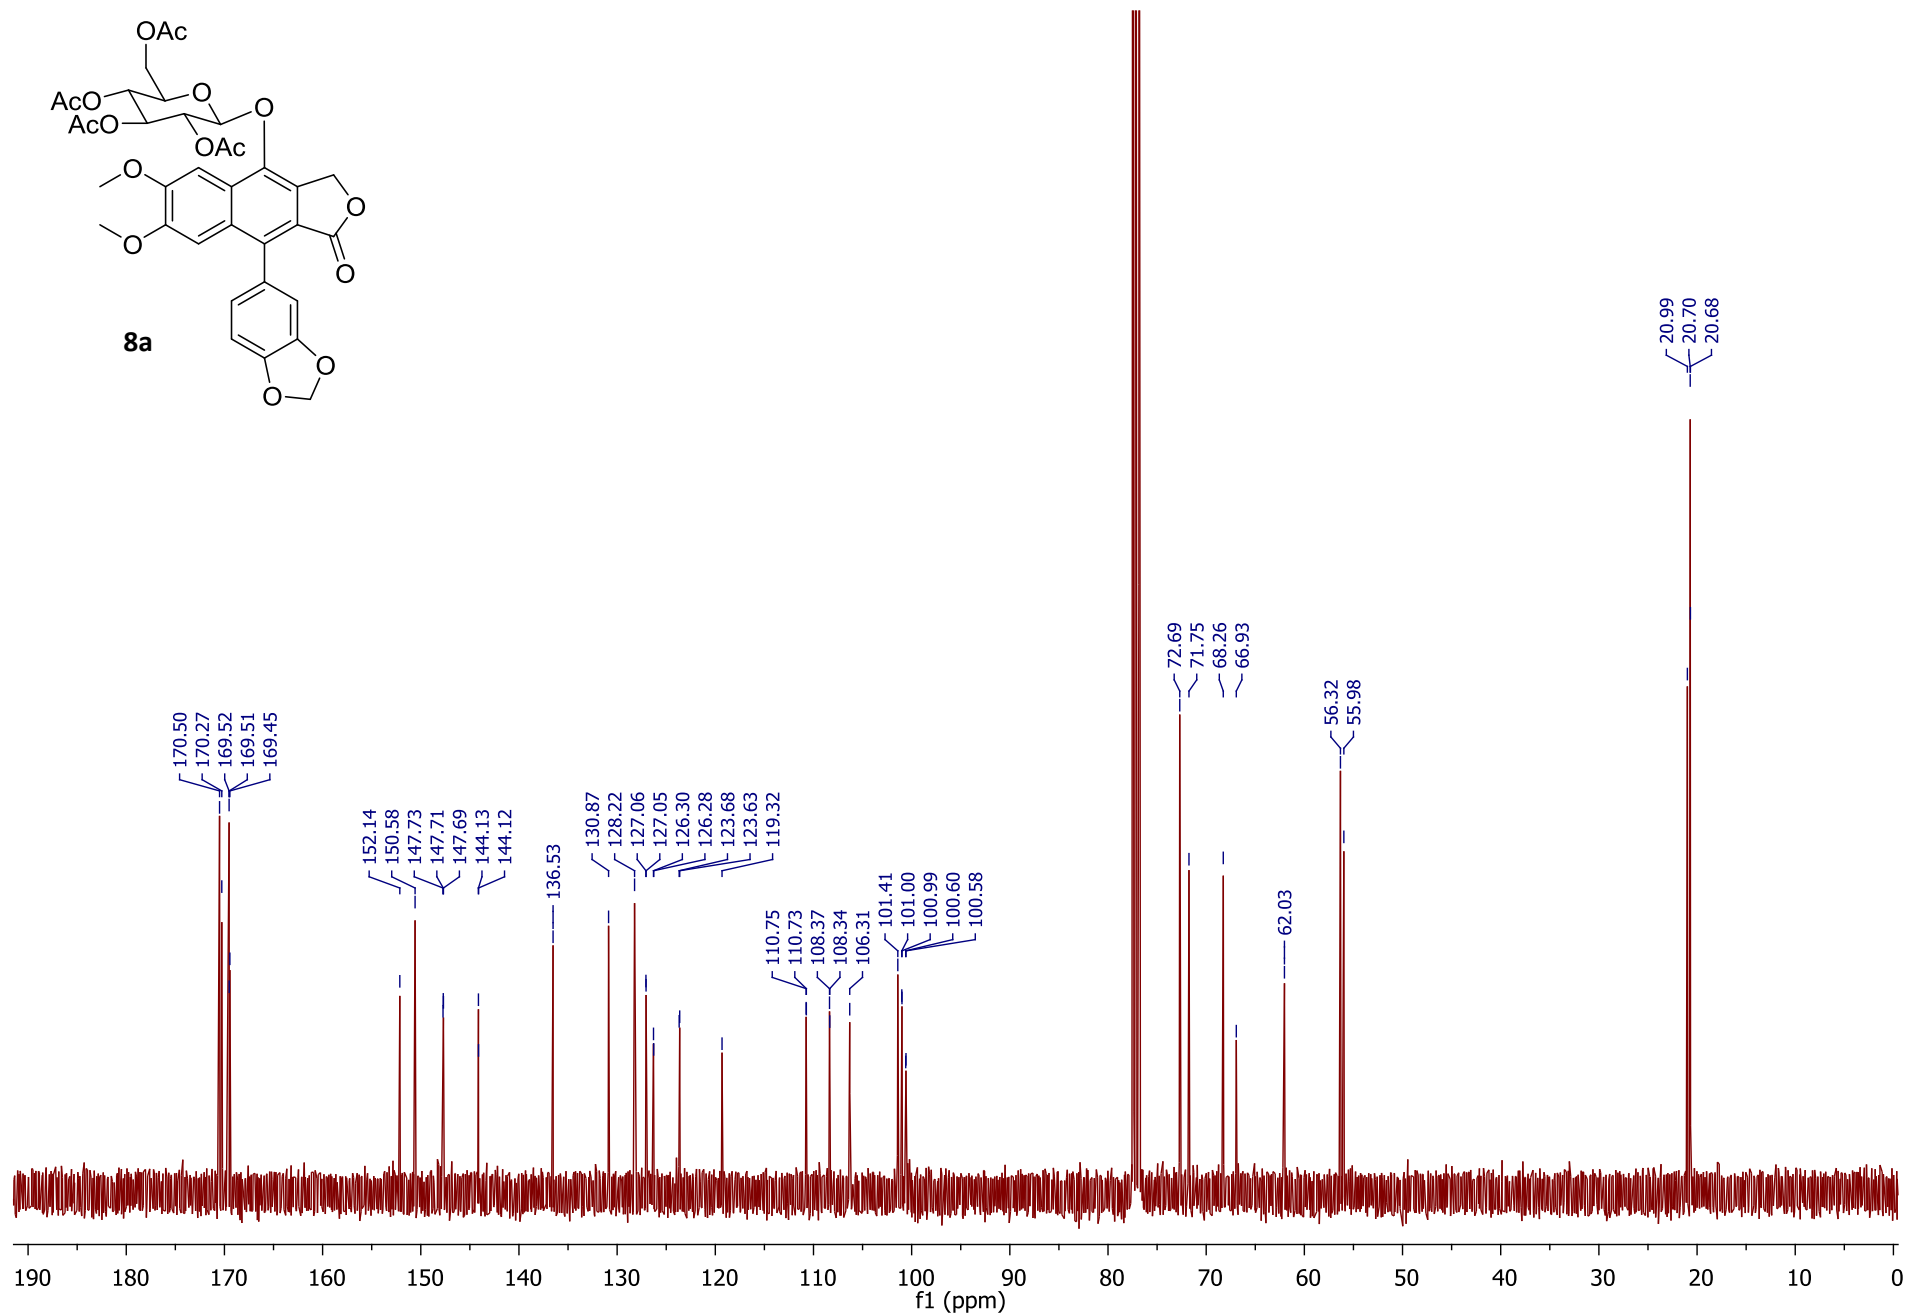

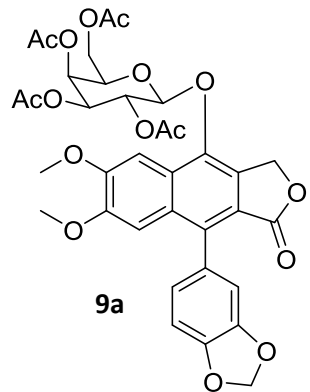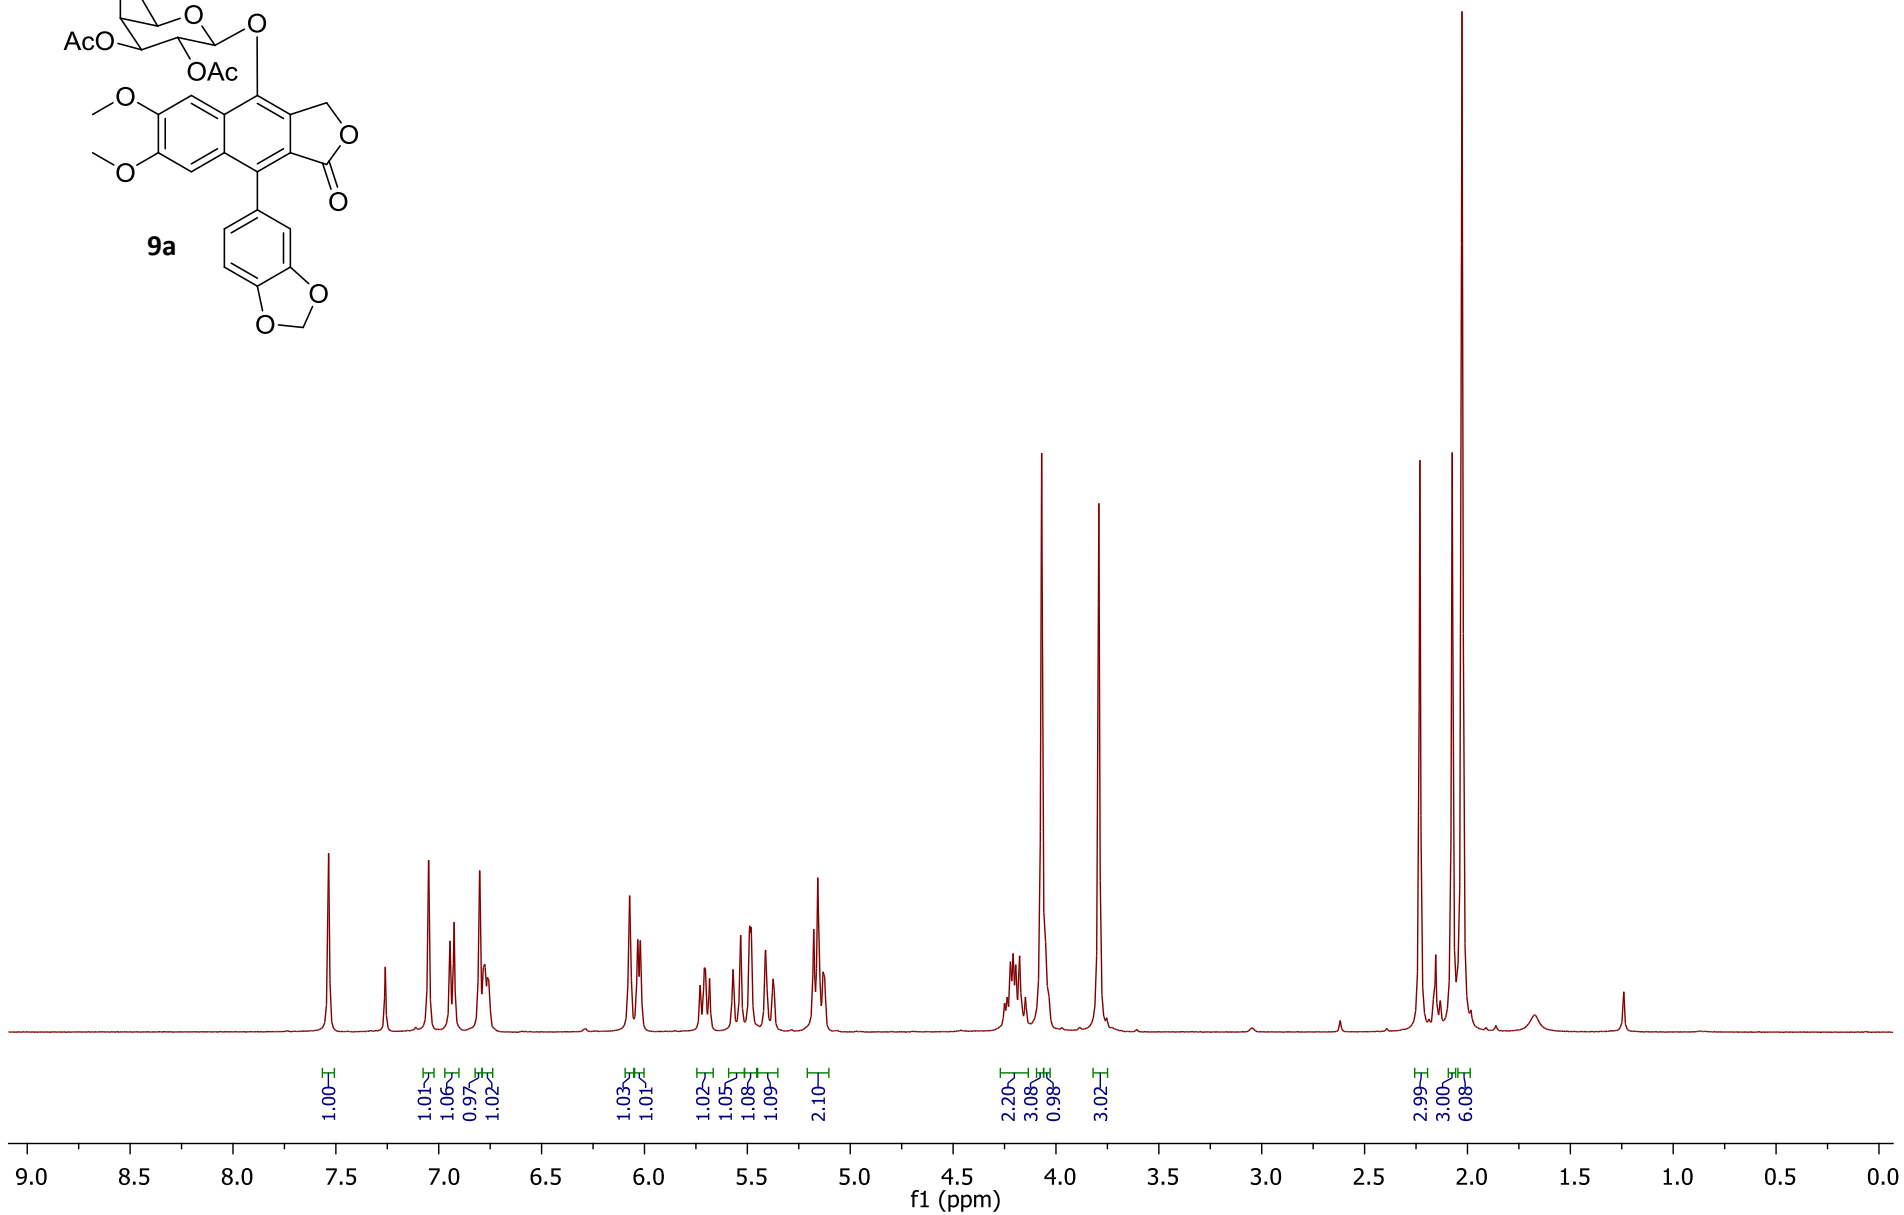

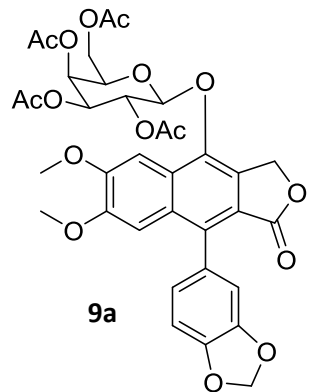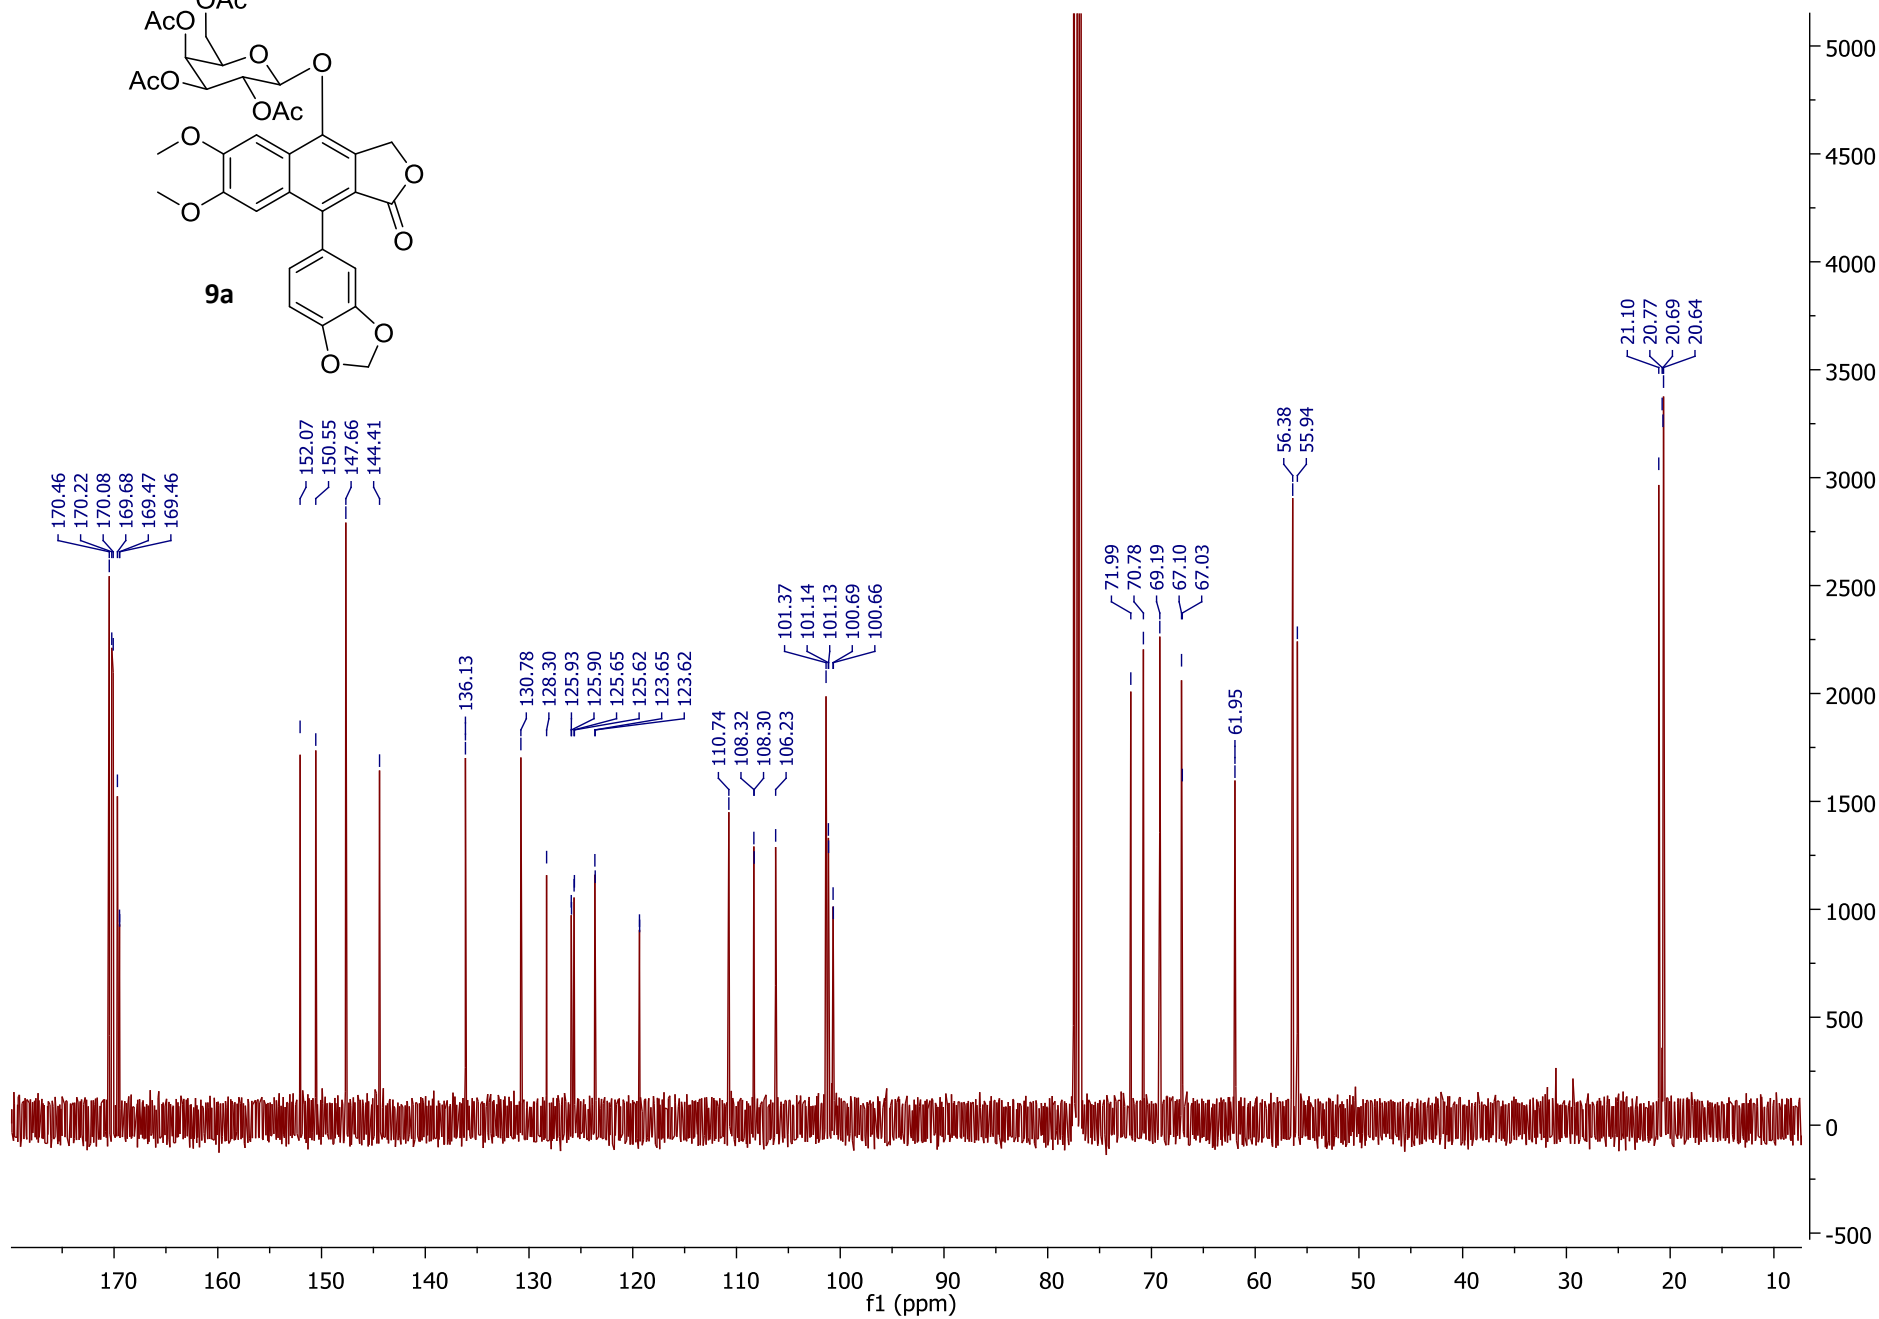

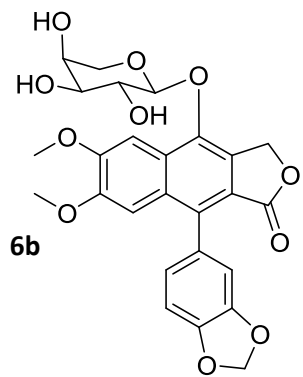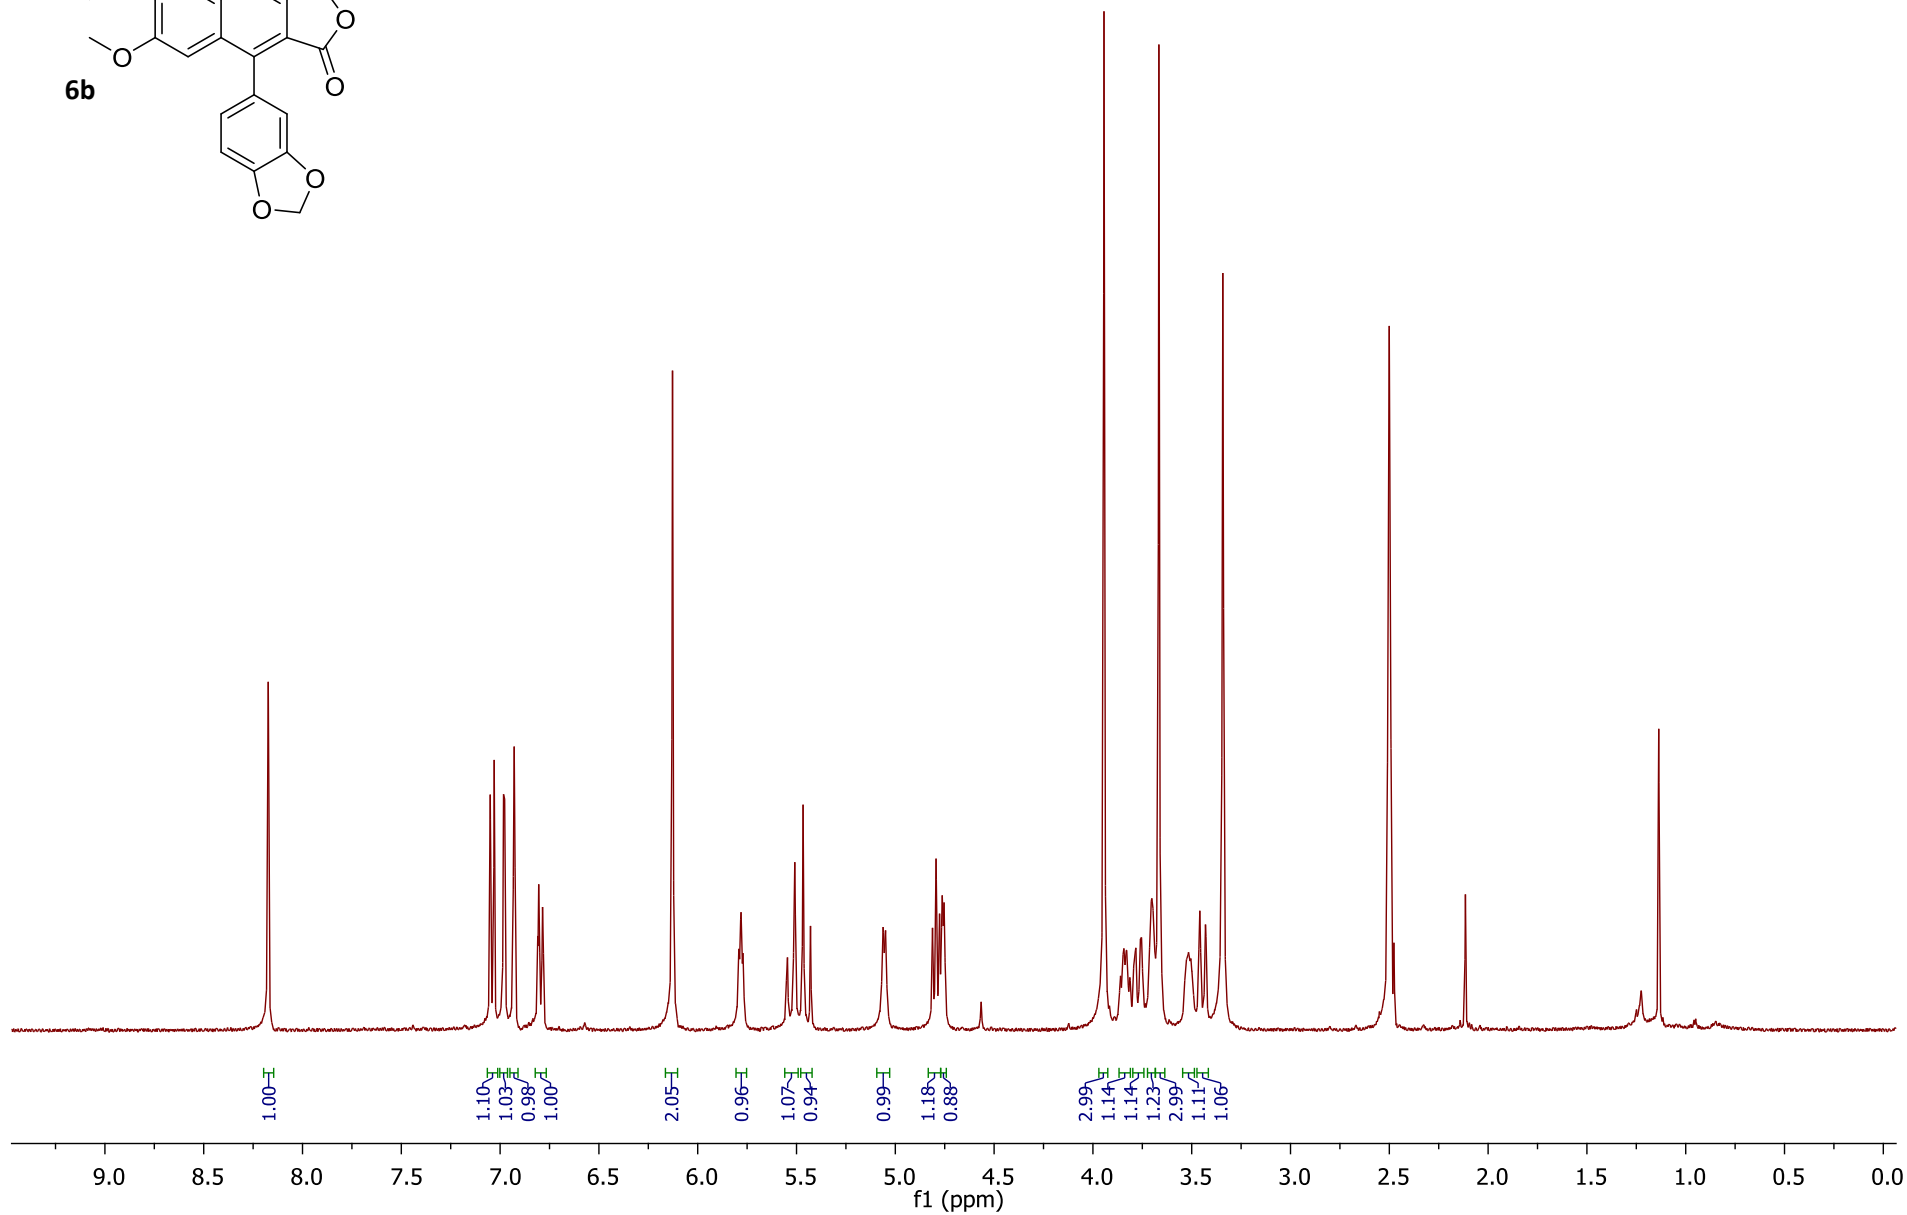

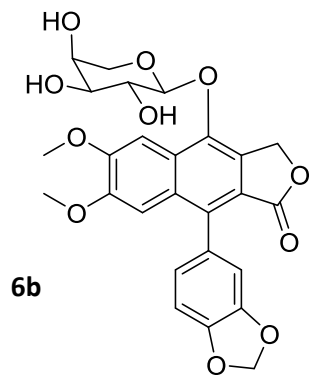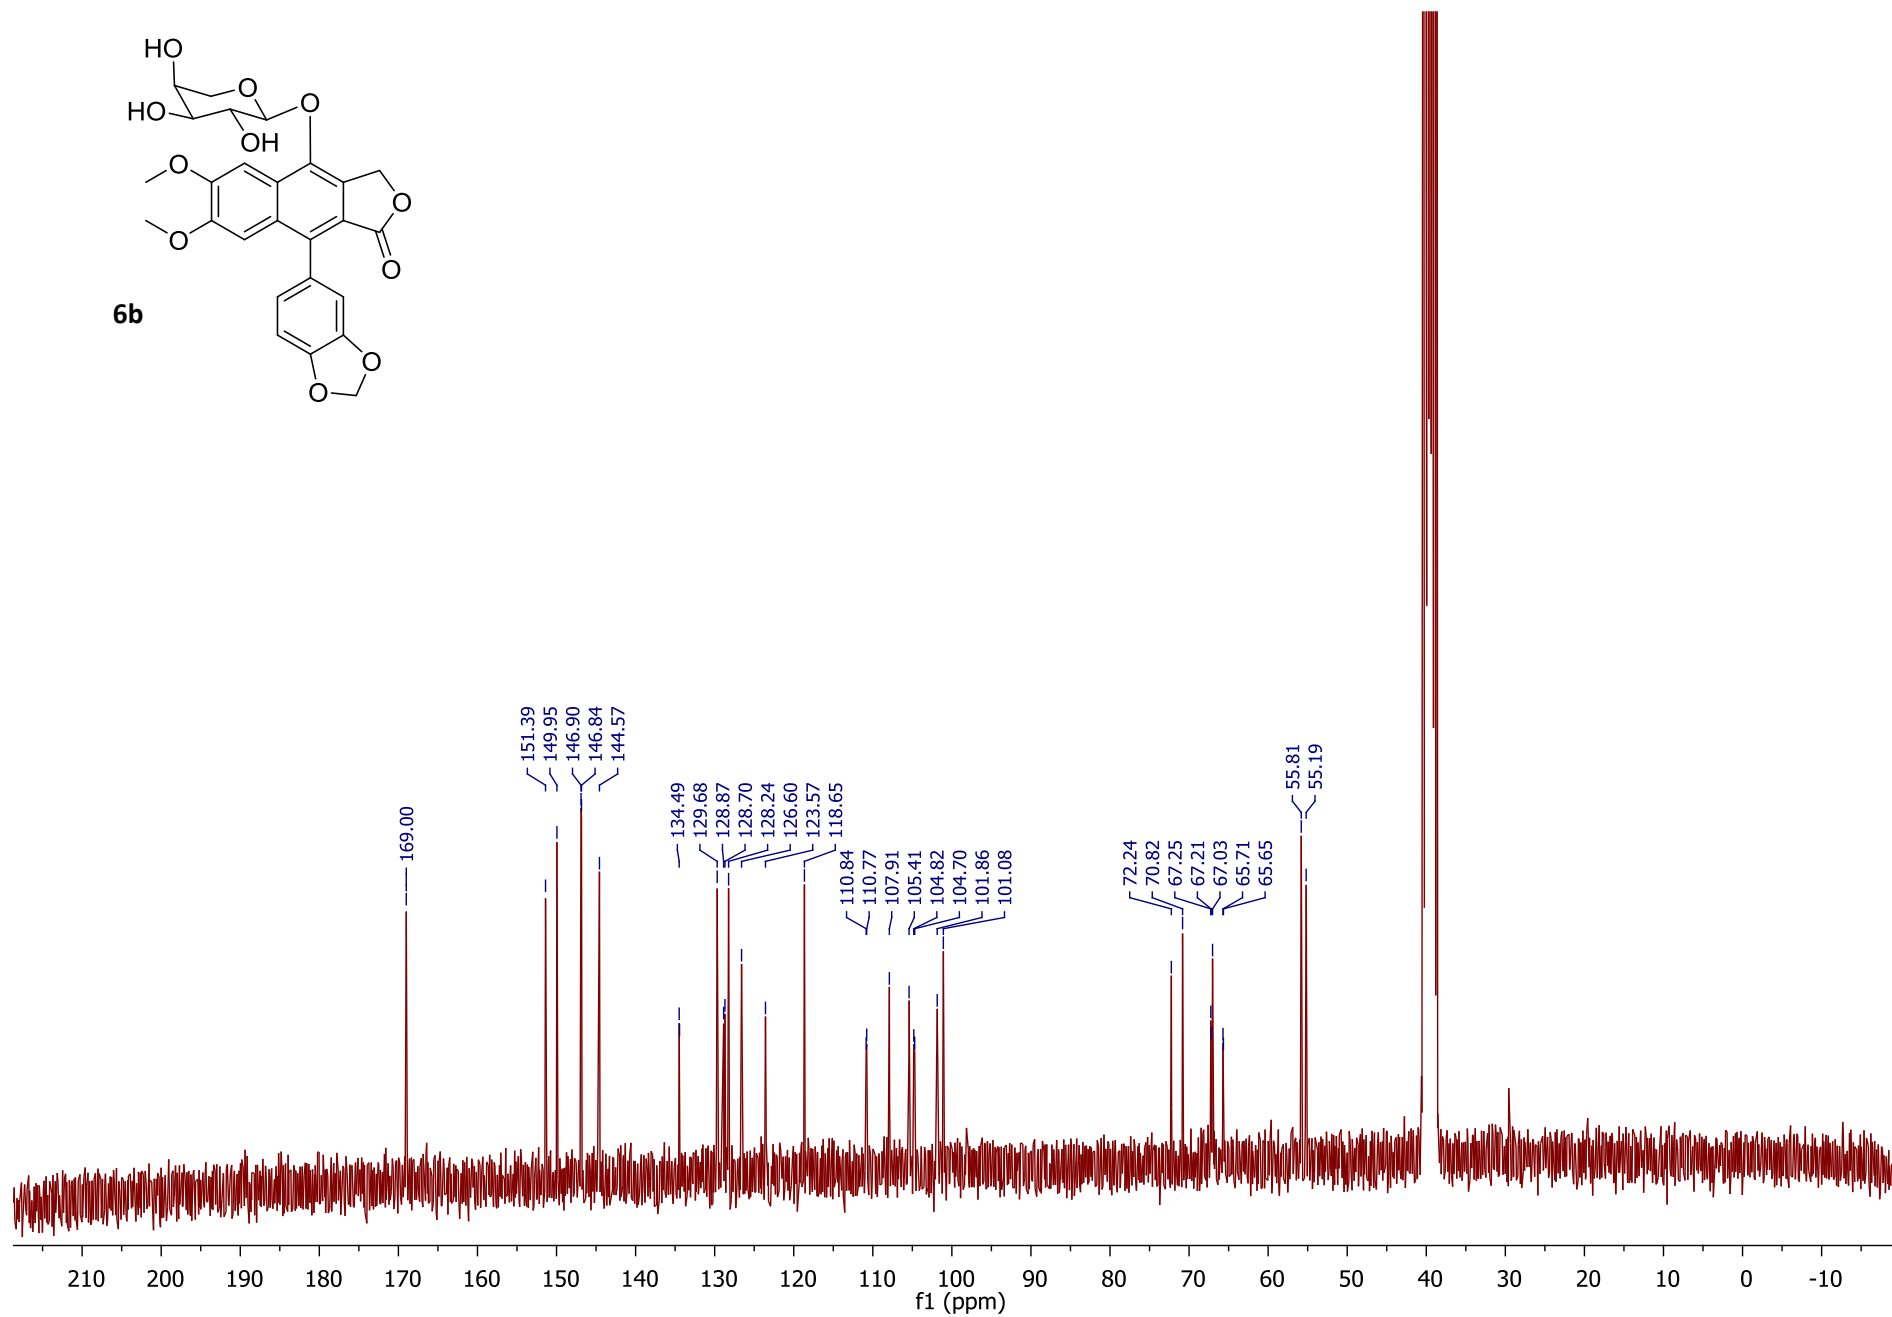

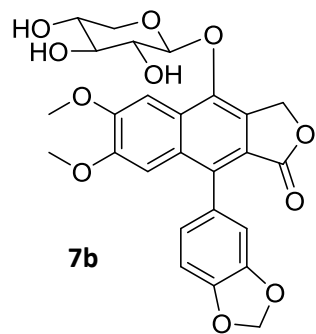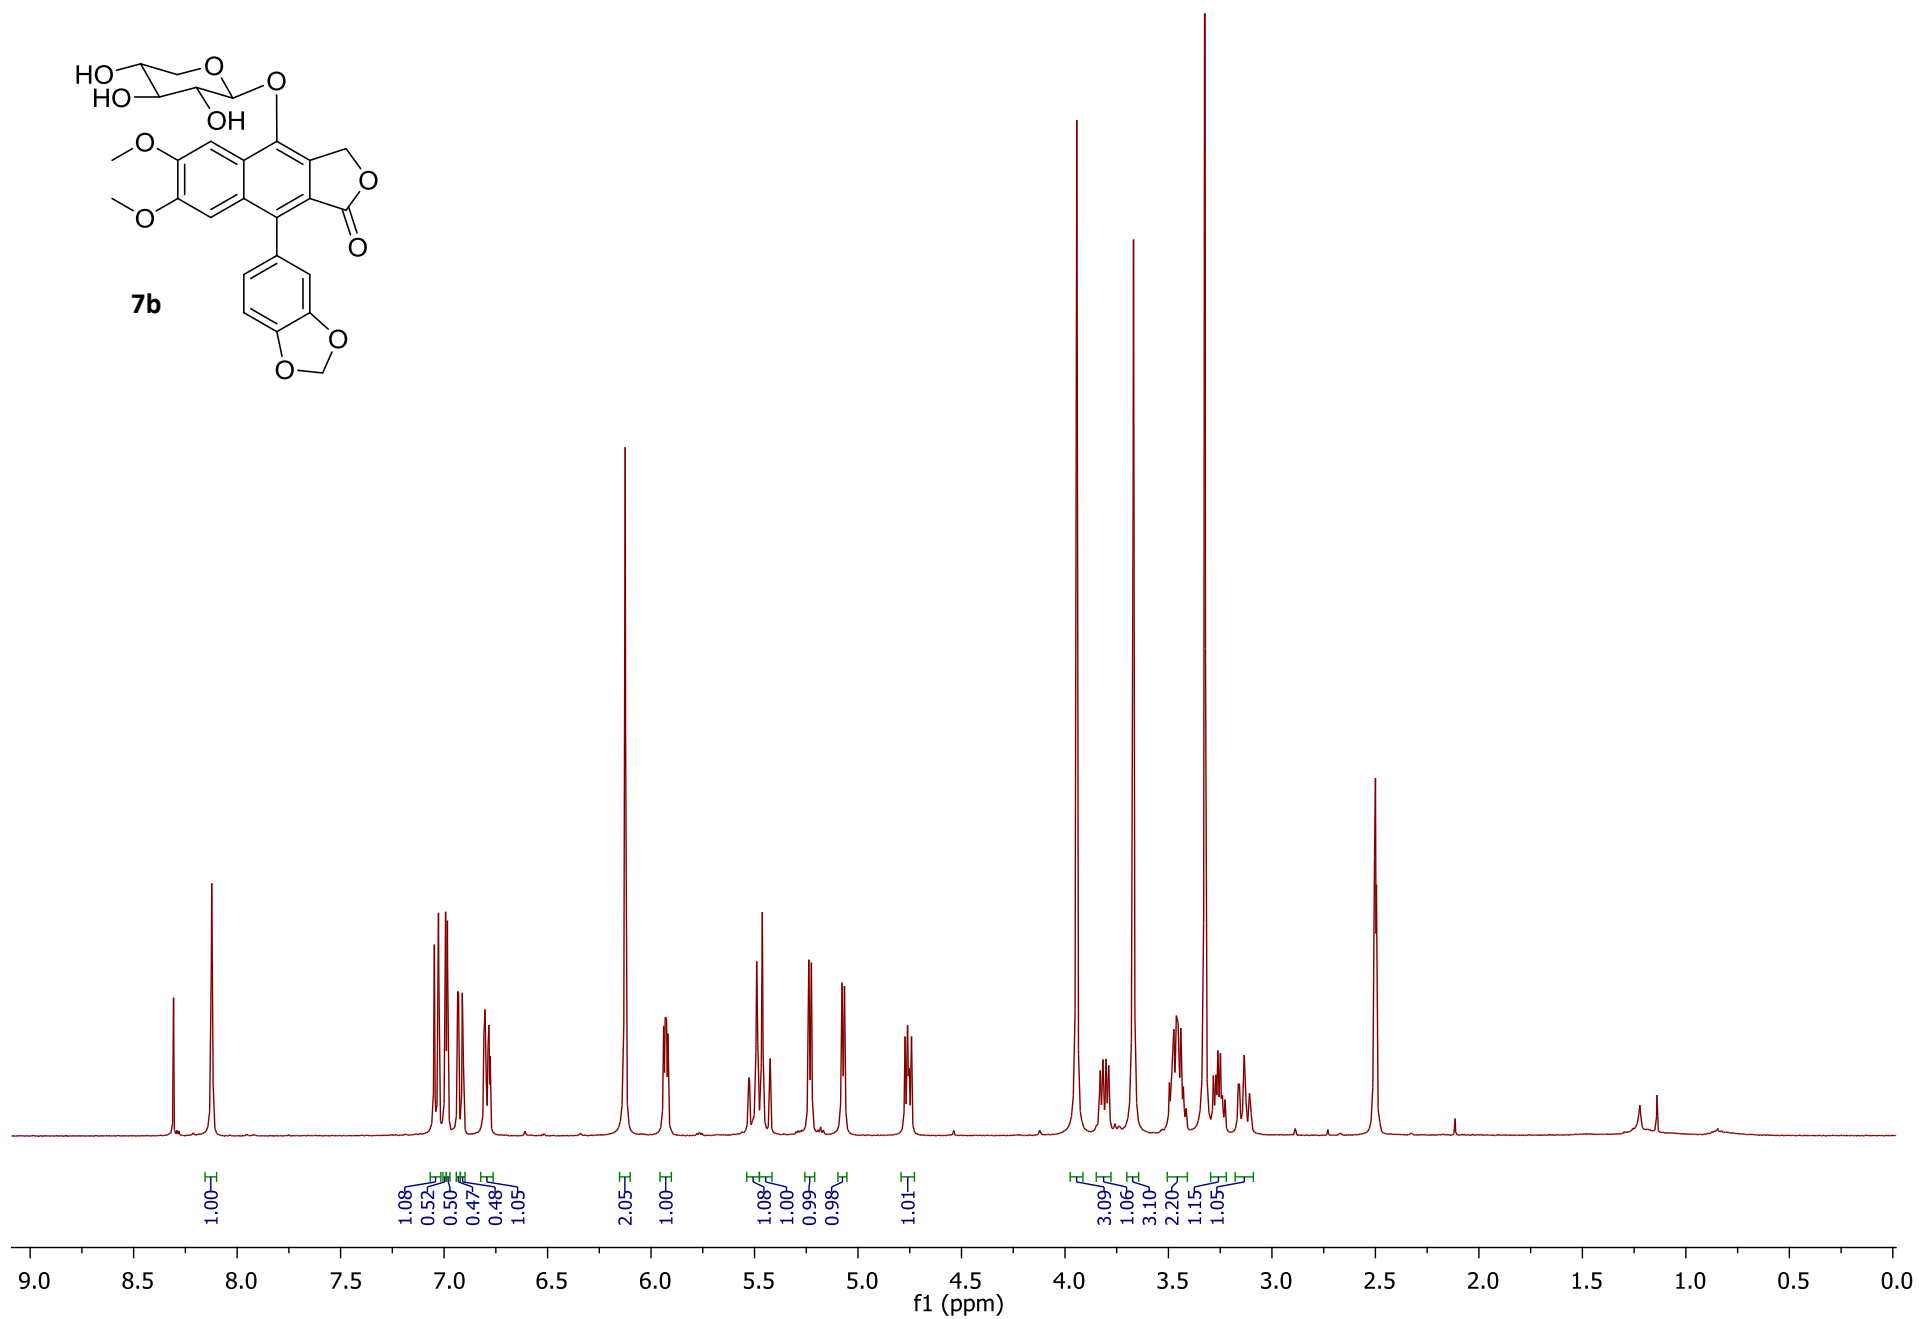

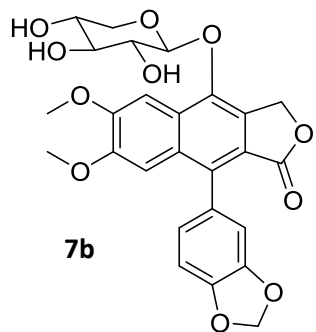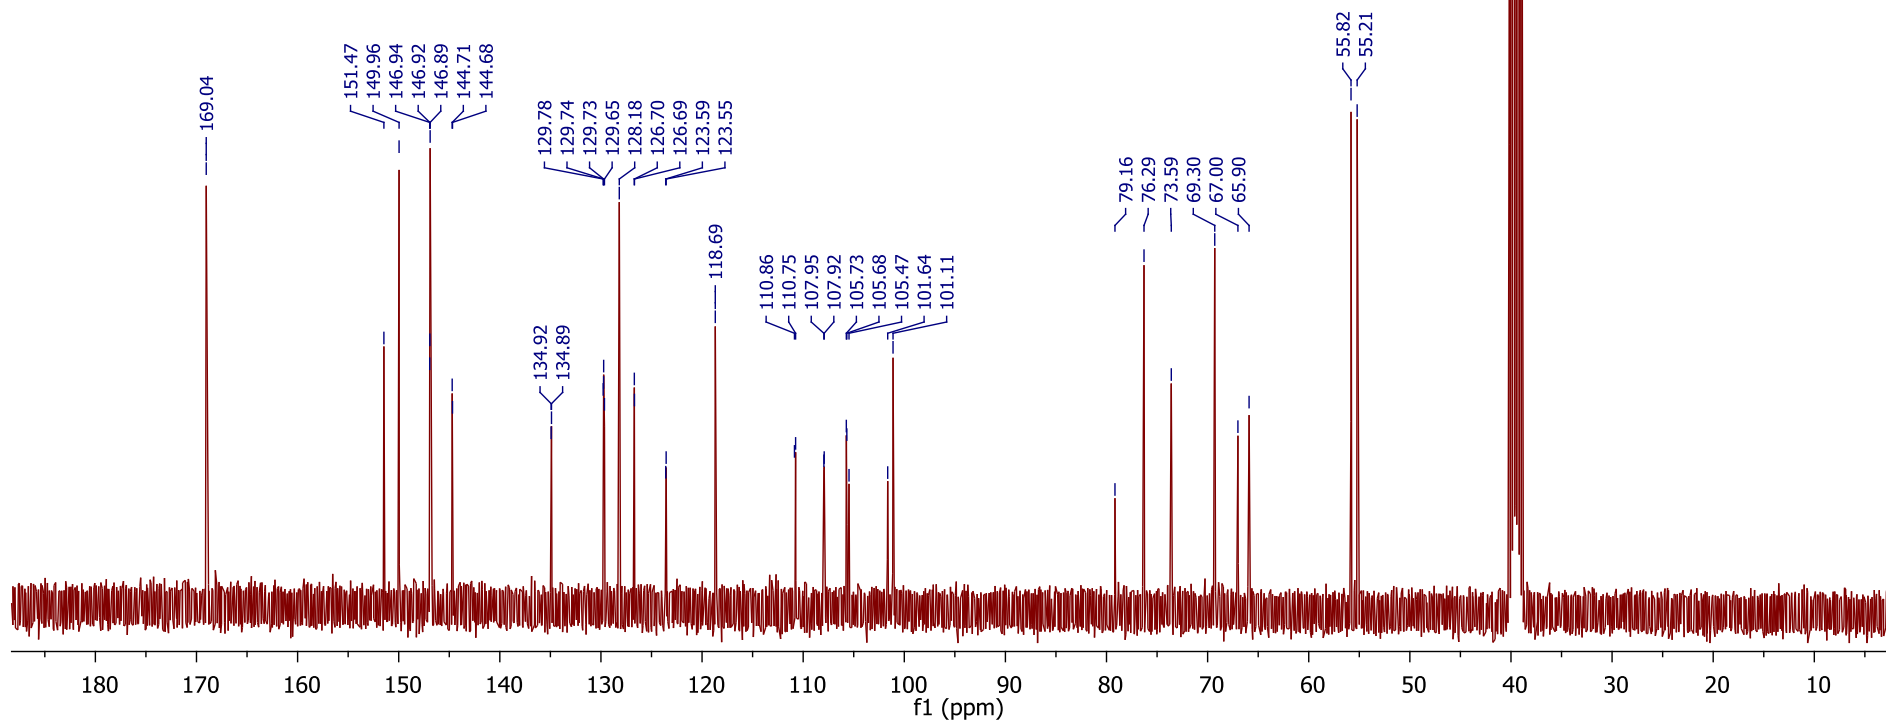

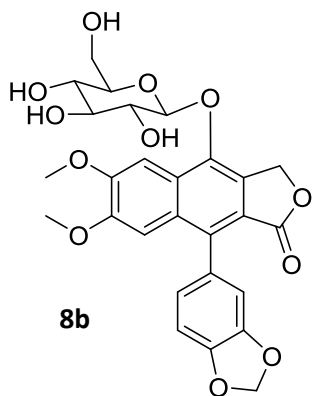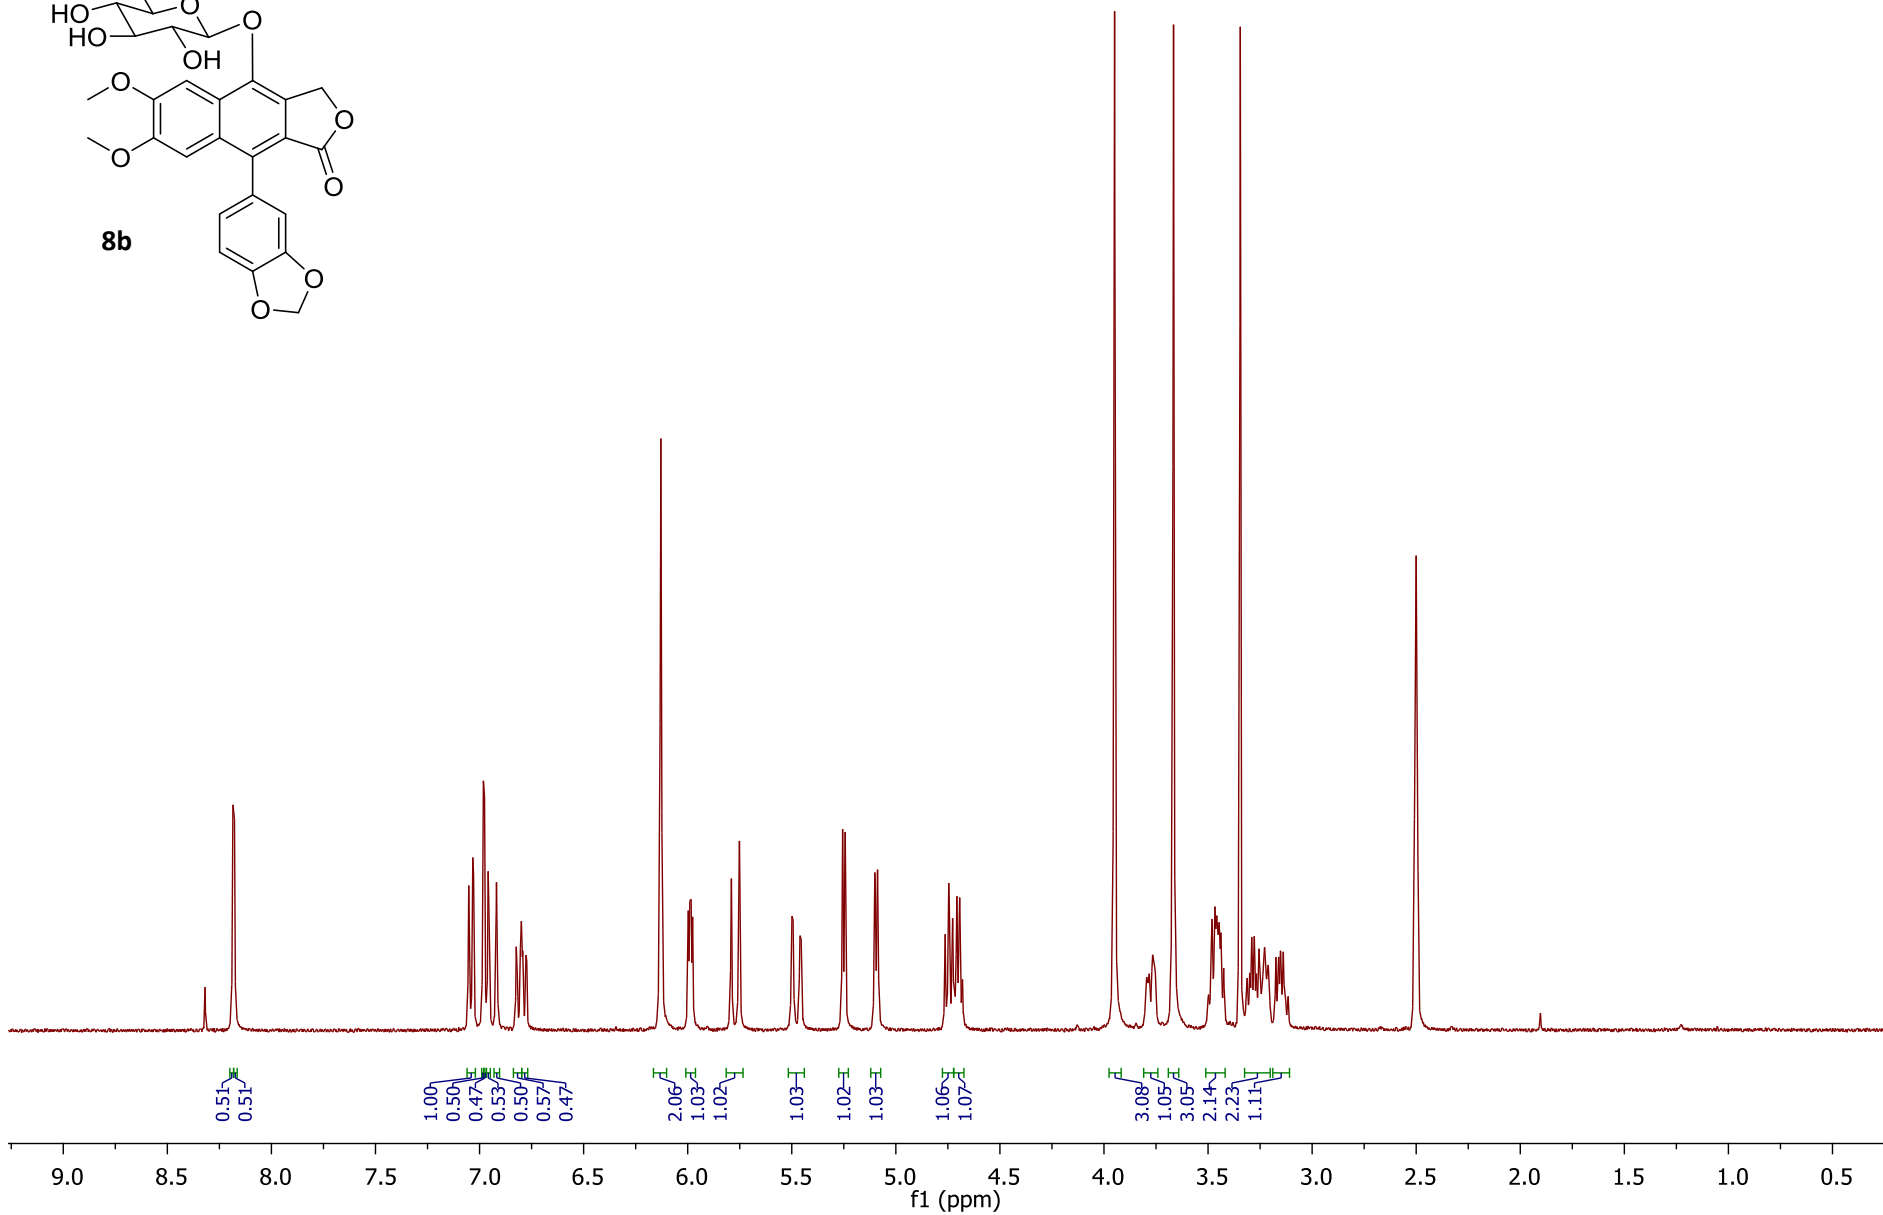





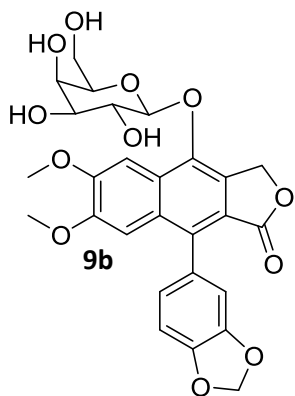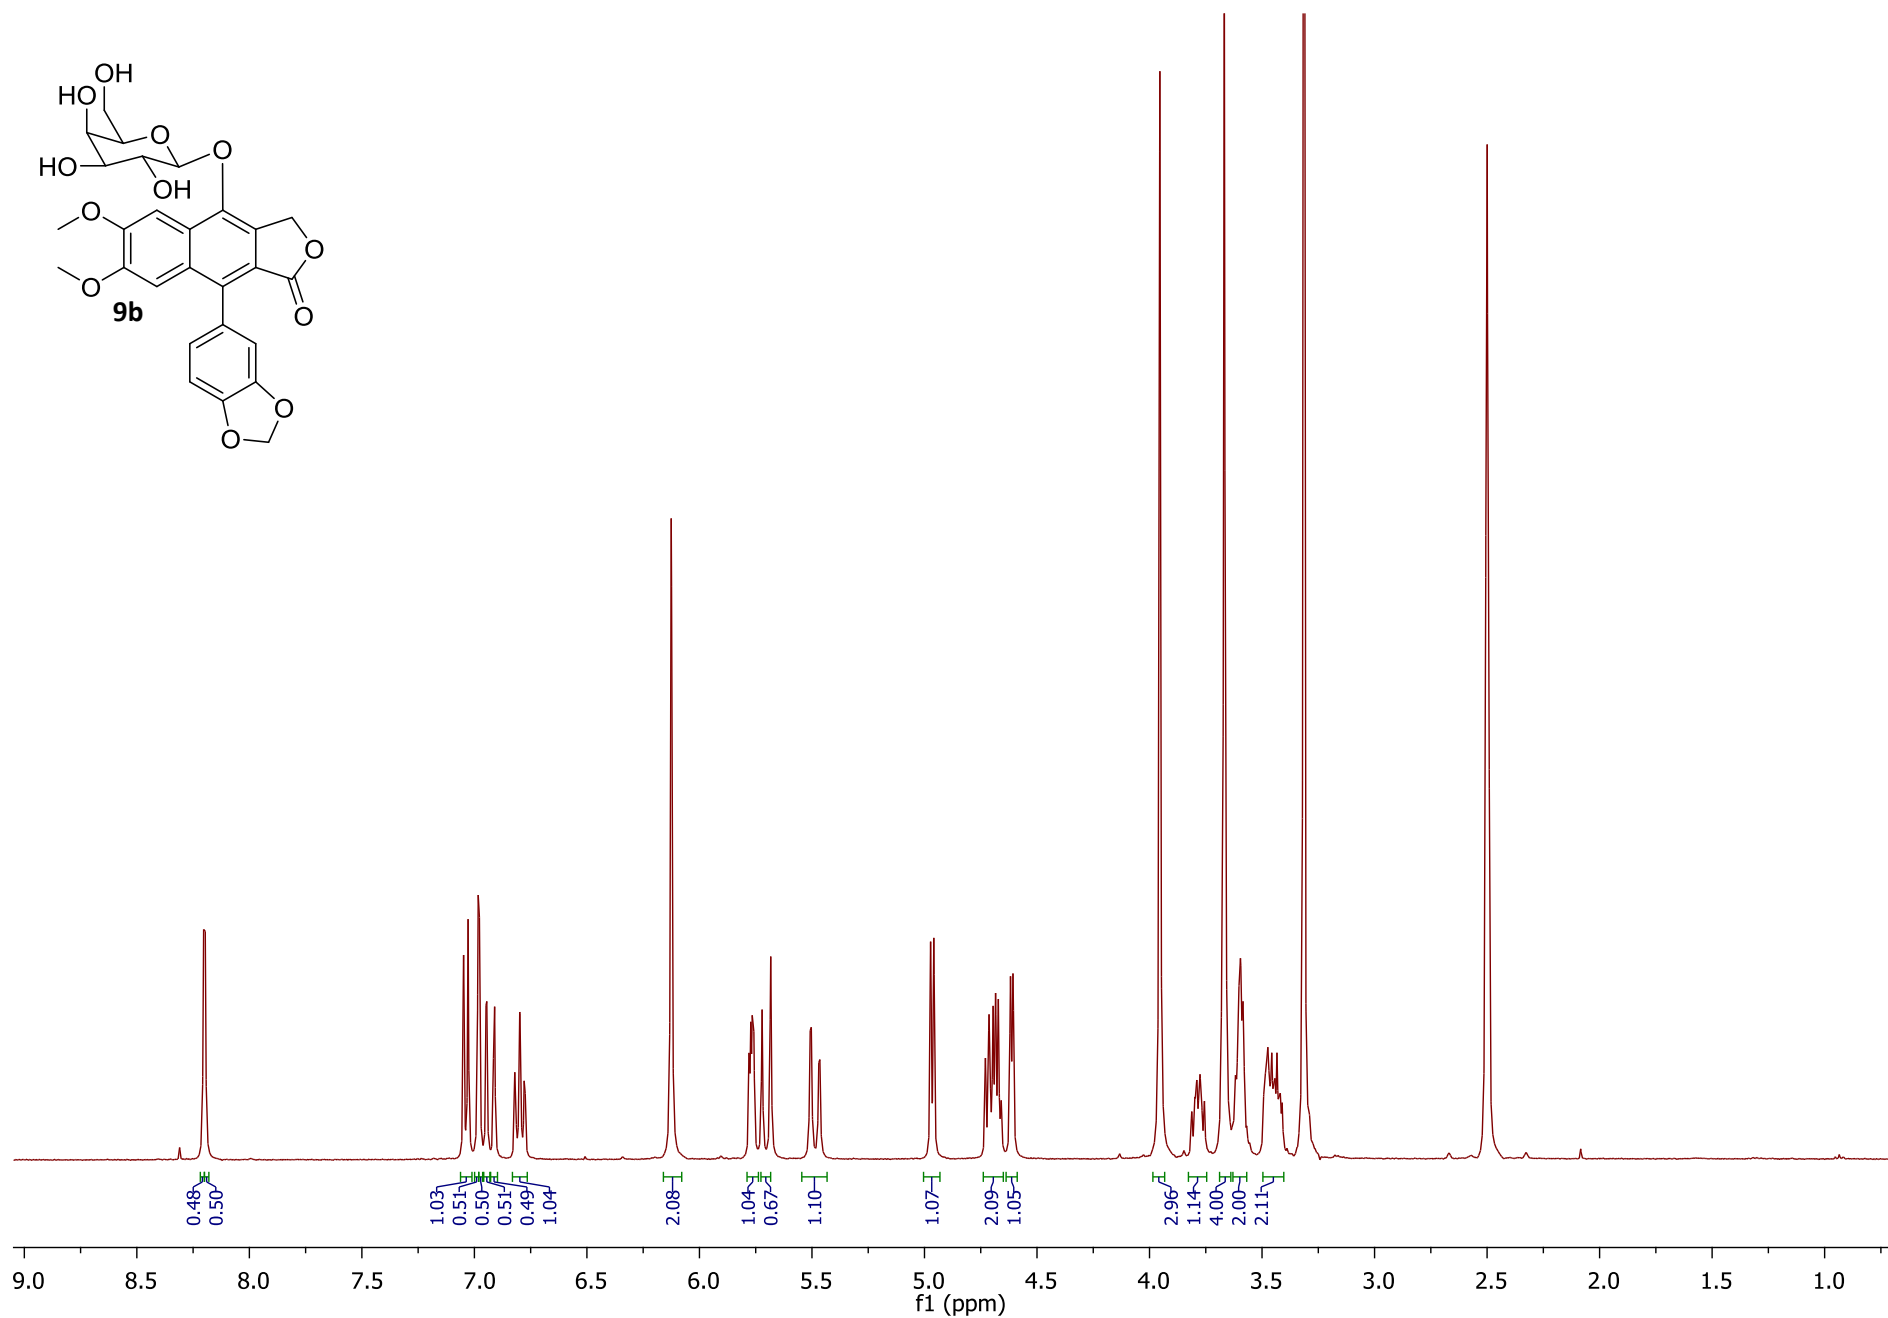

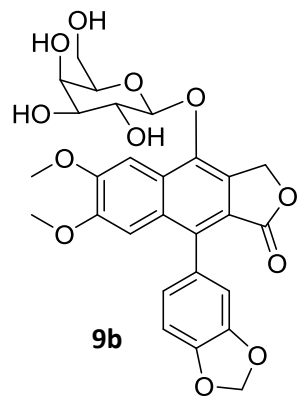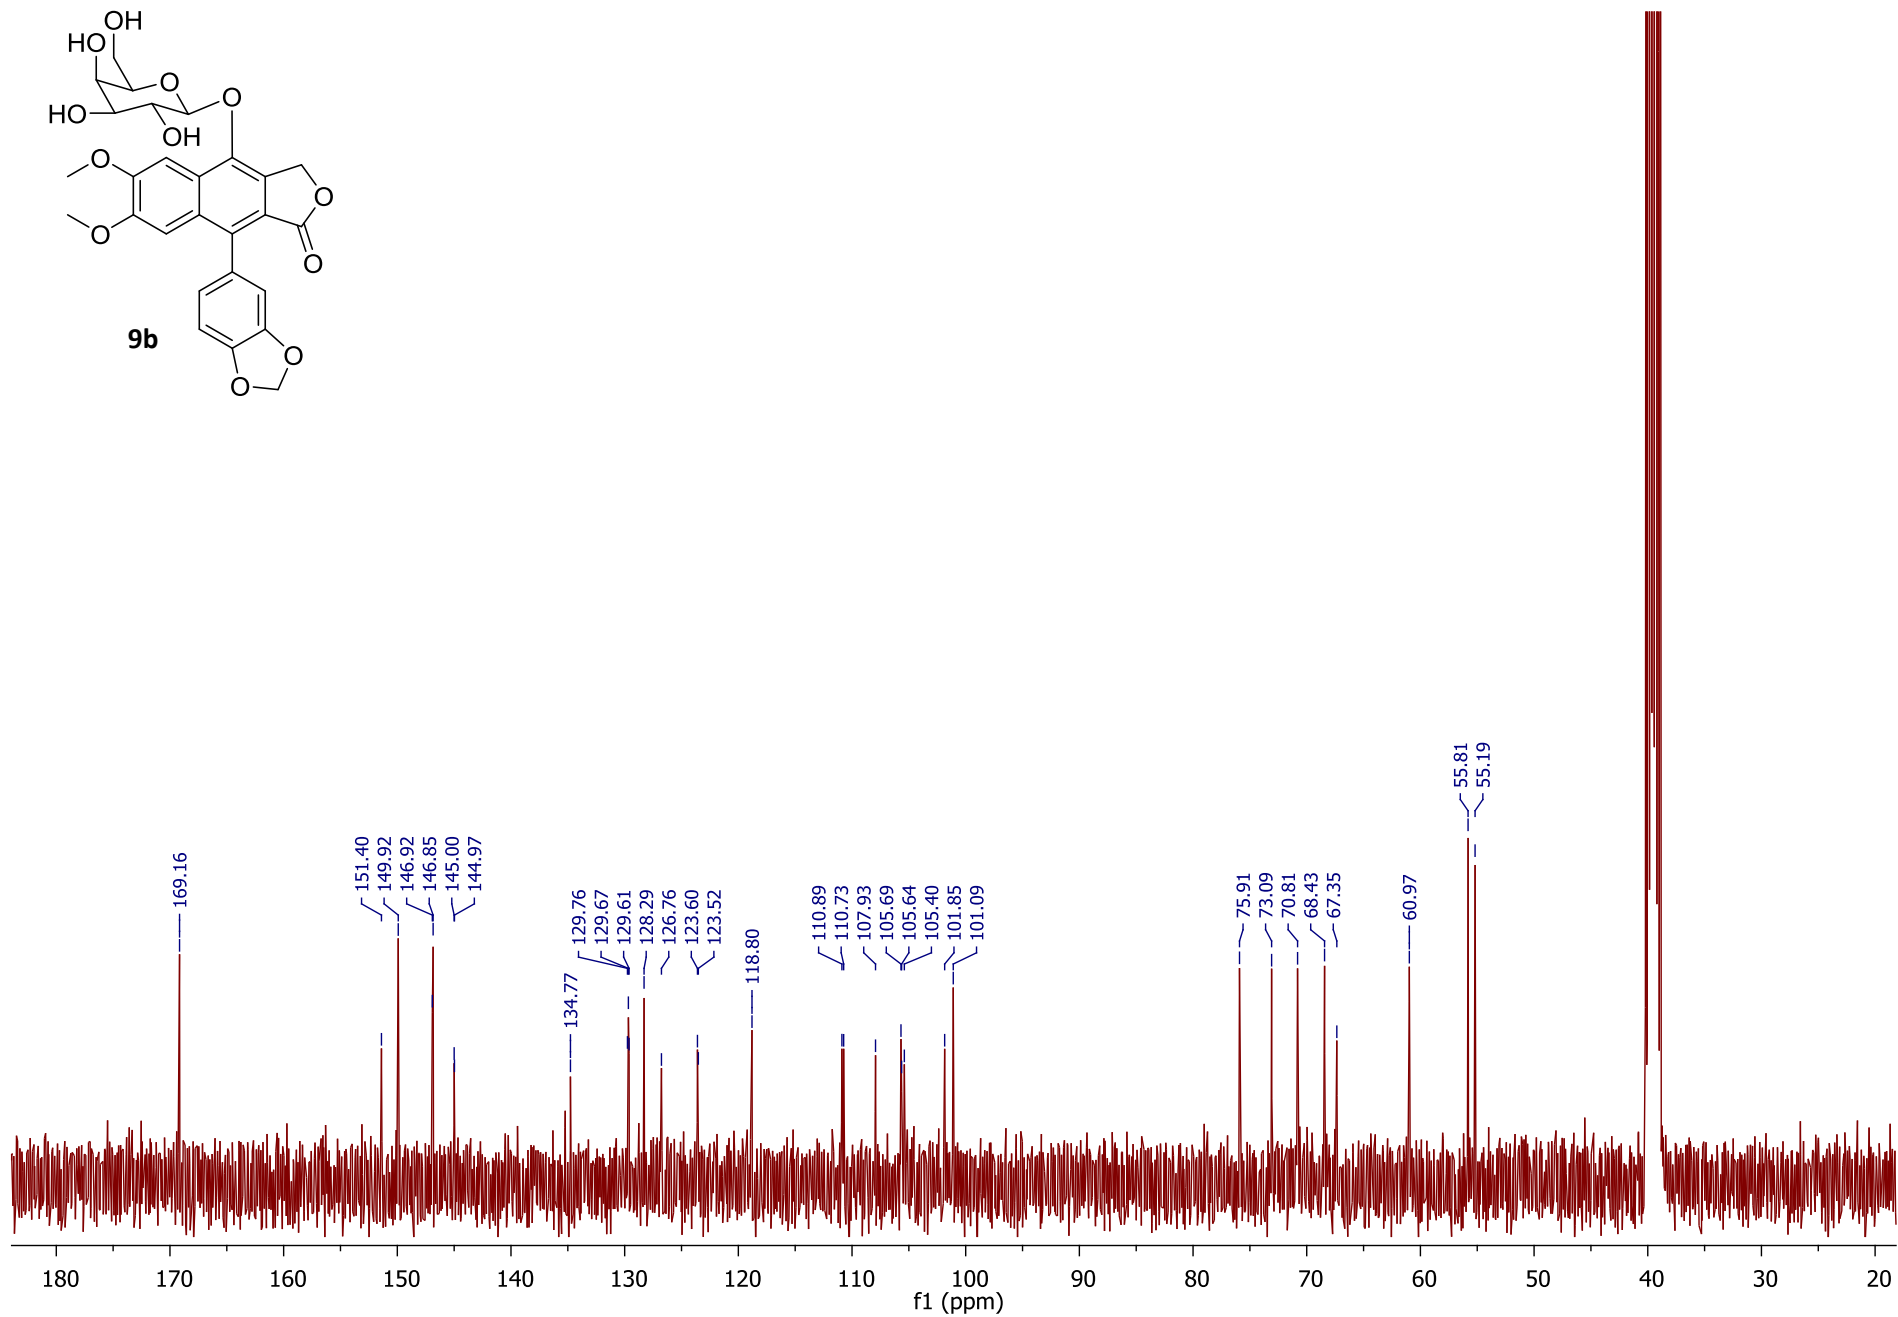

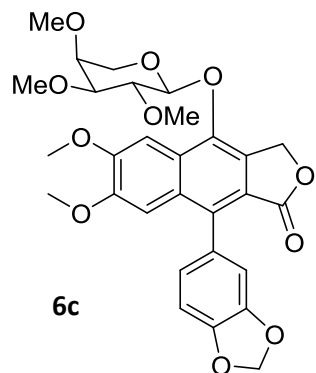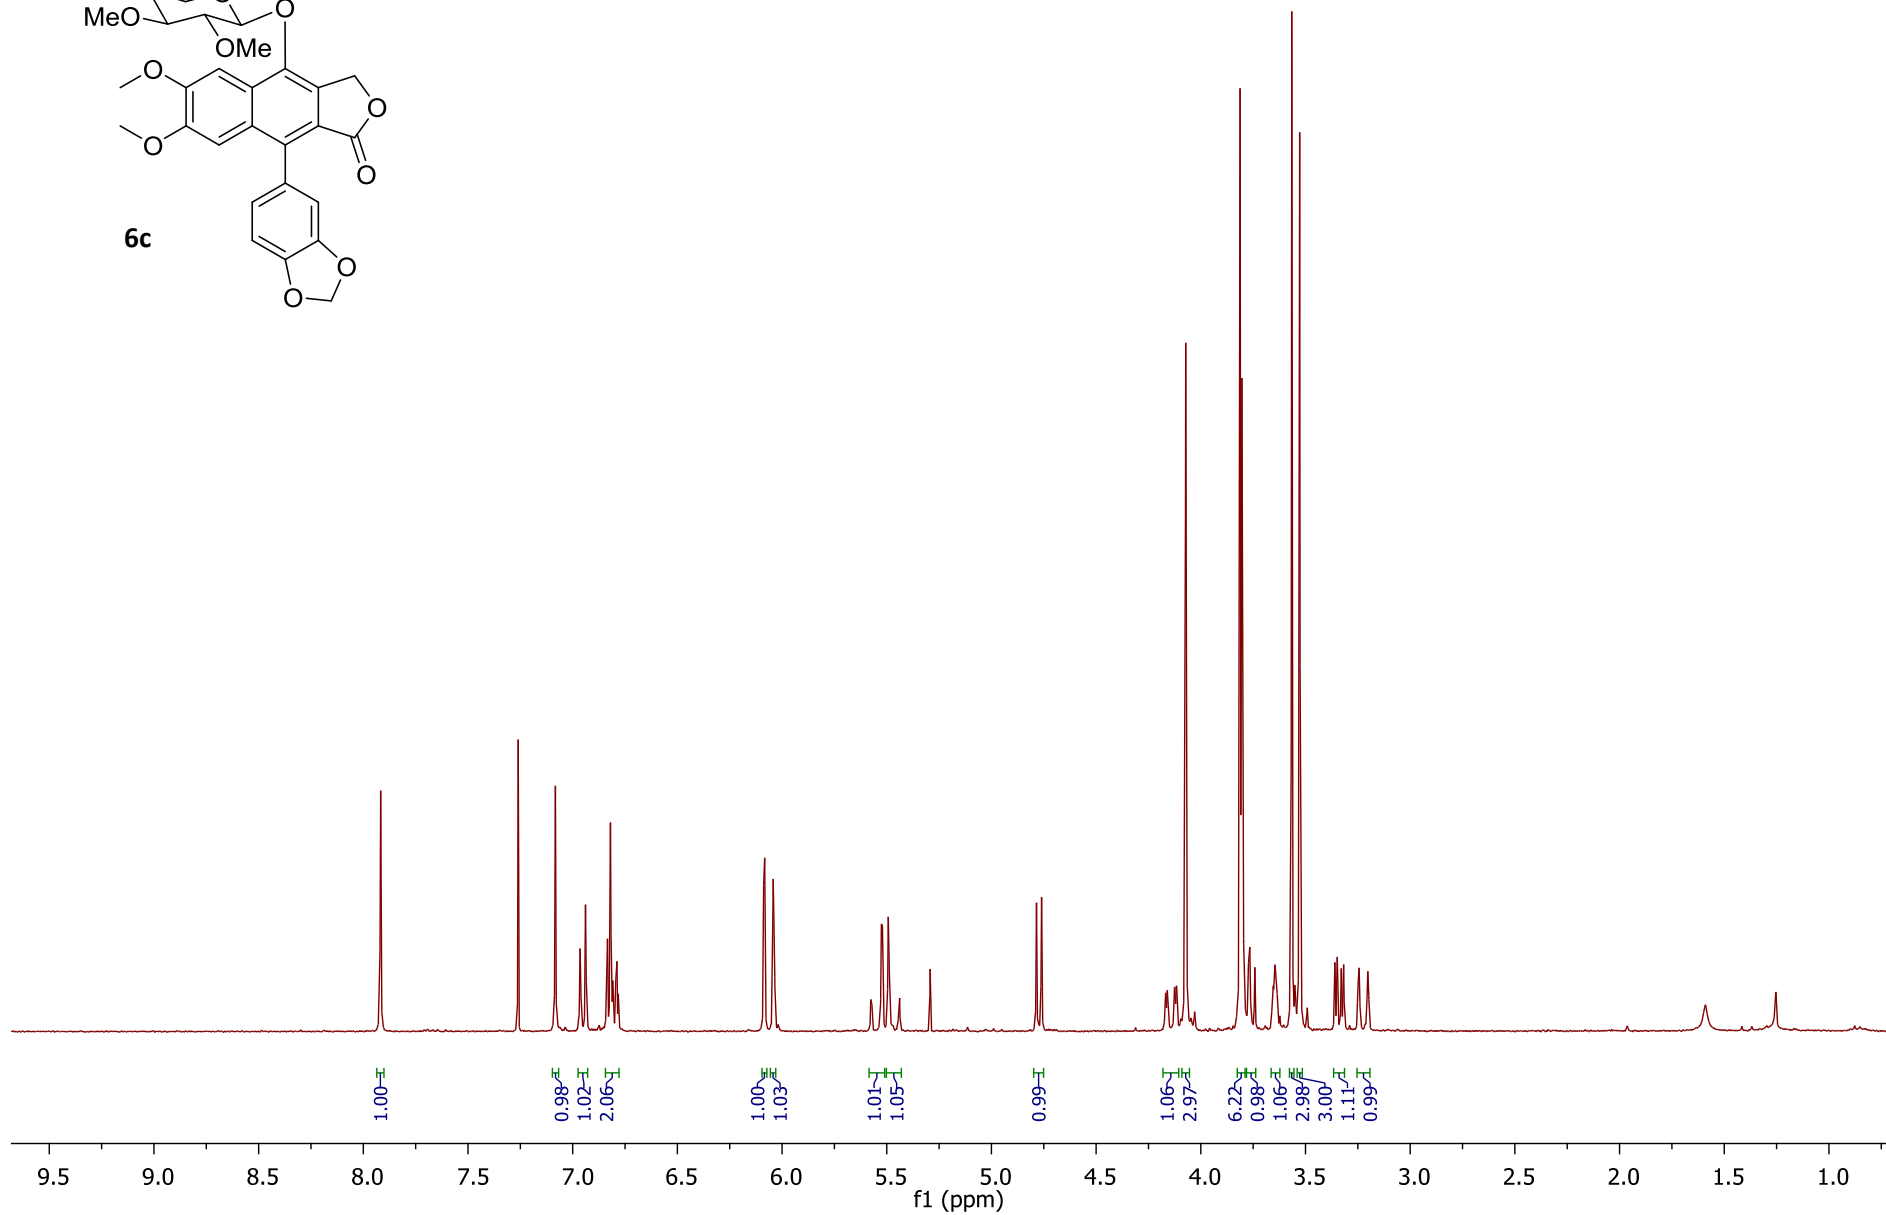





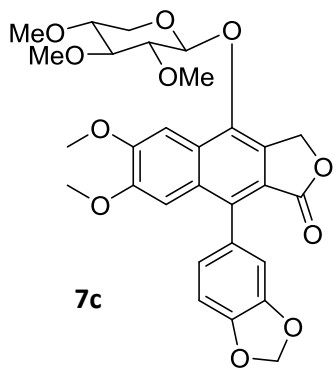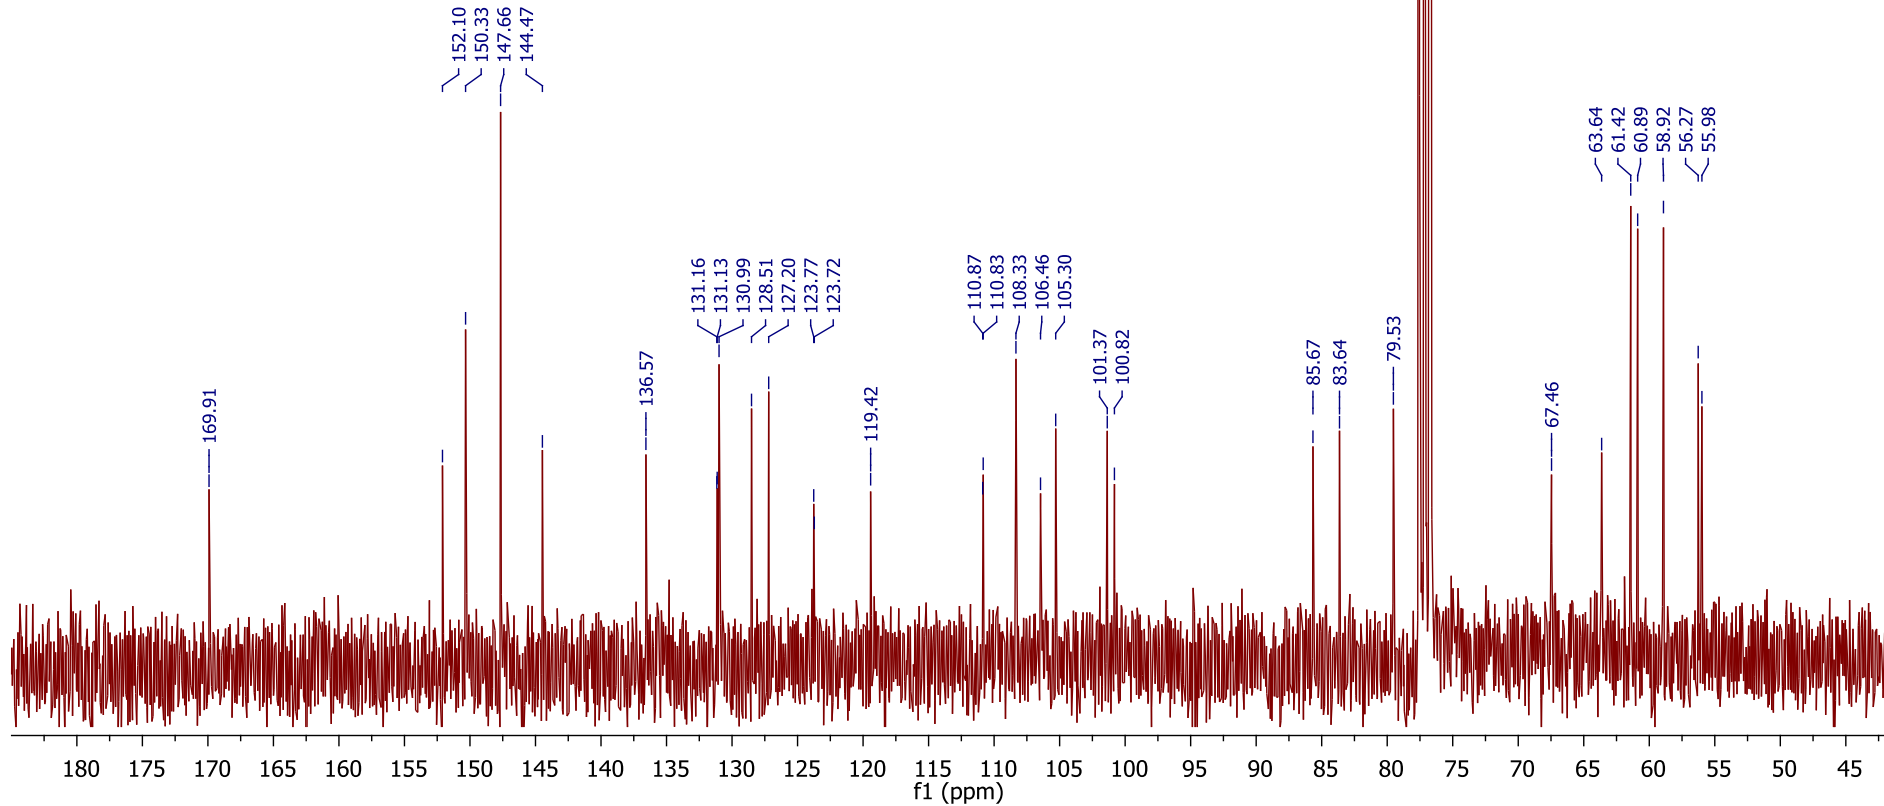

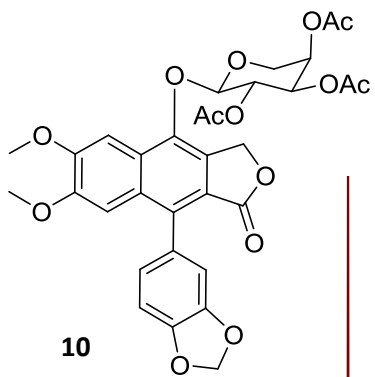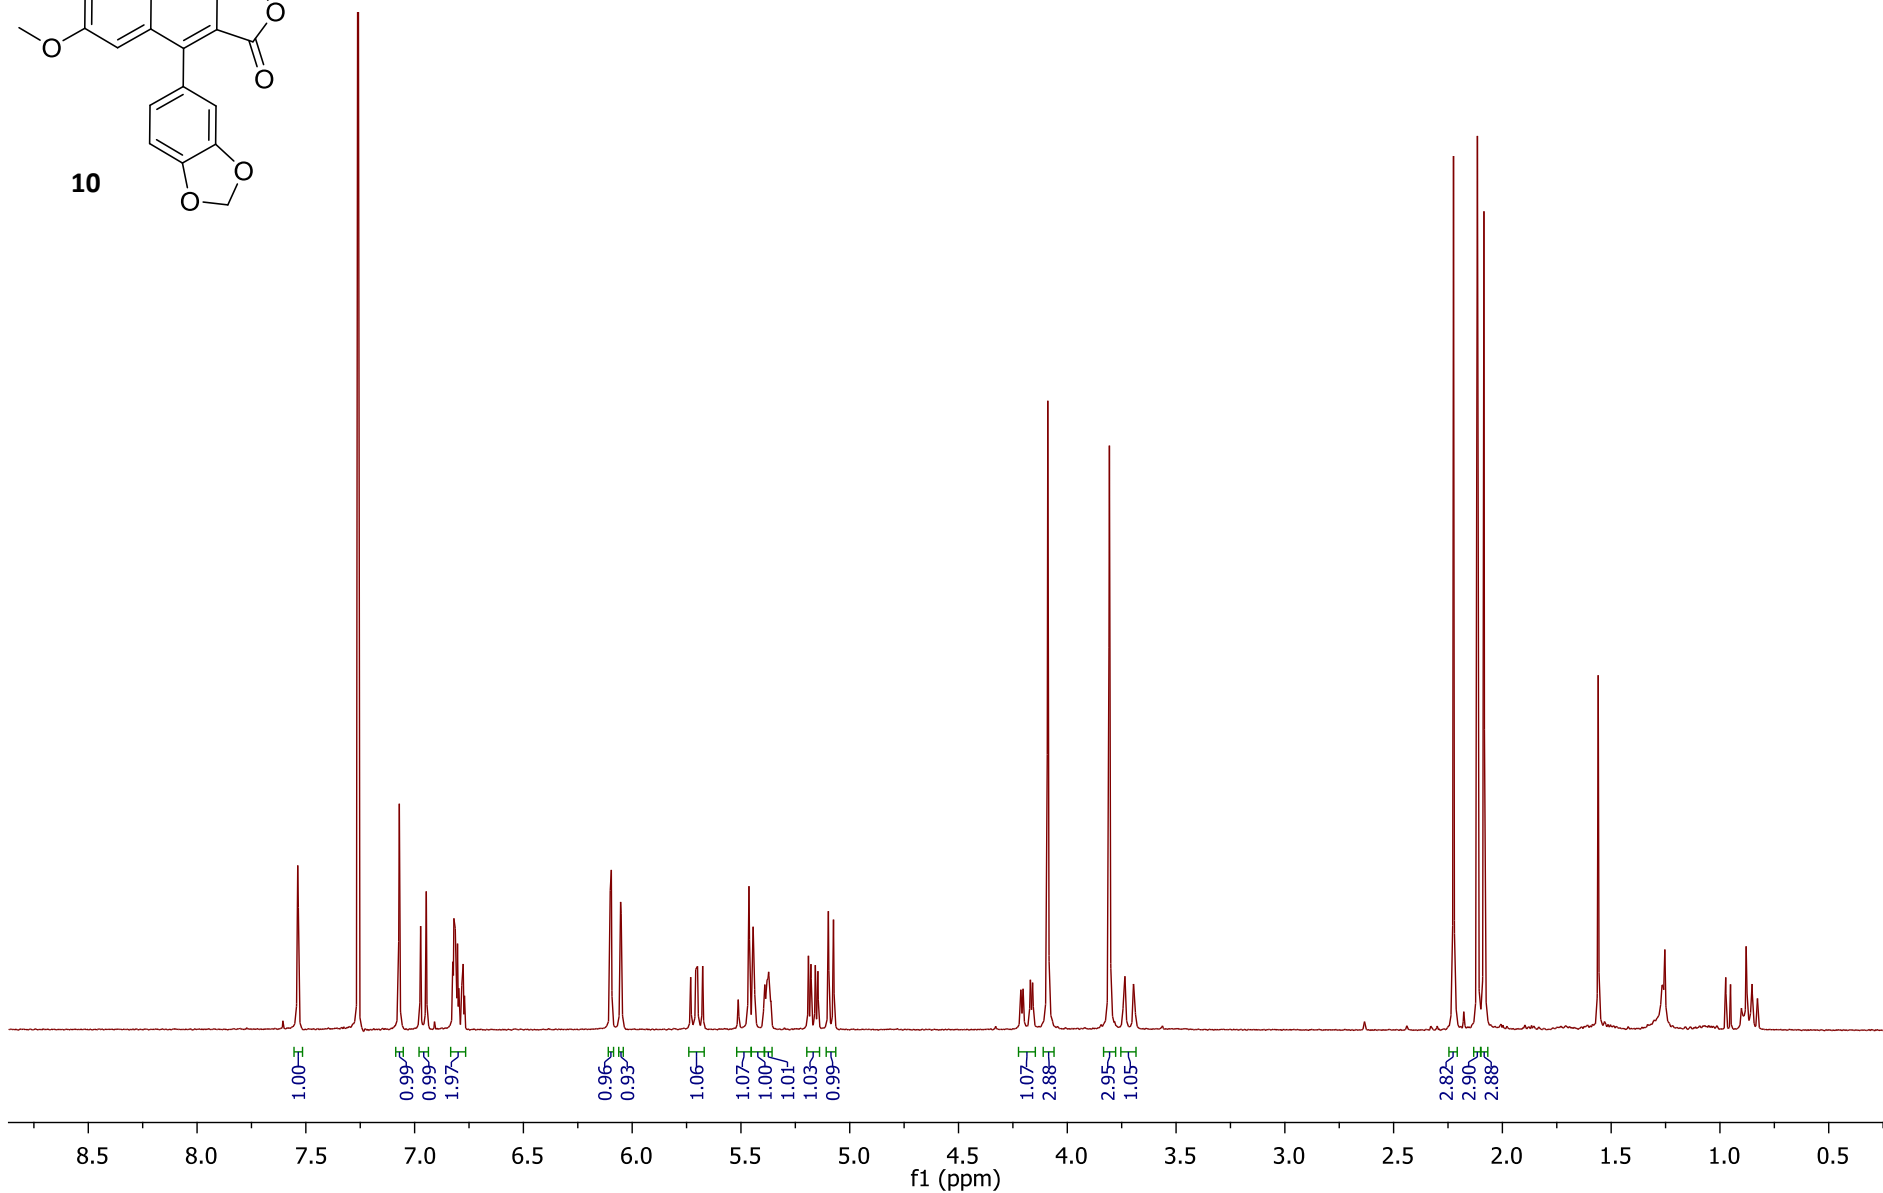



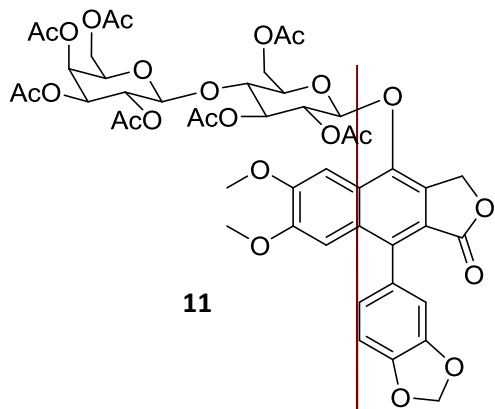

11

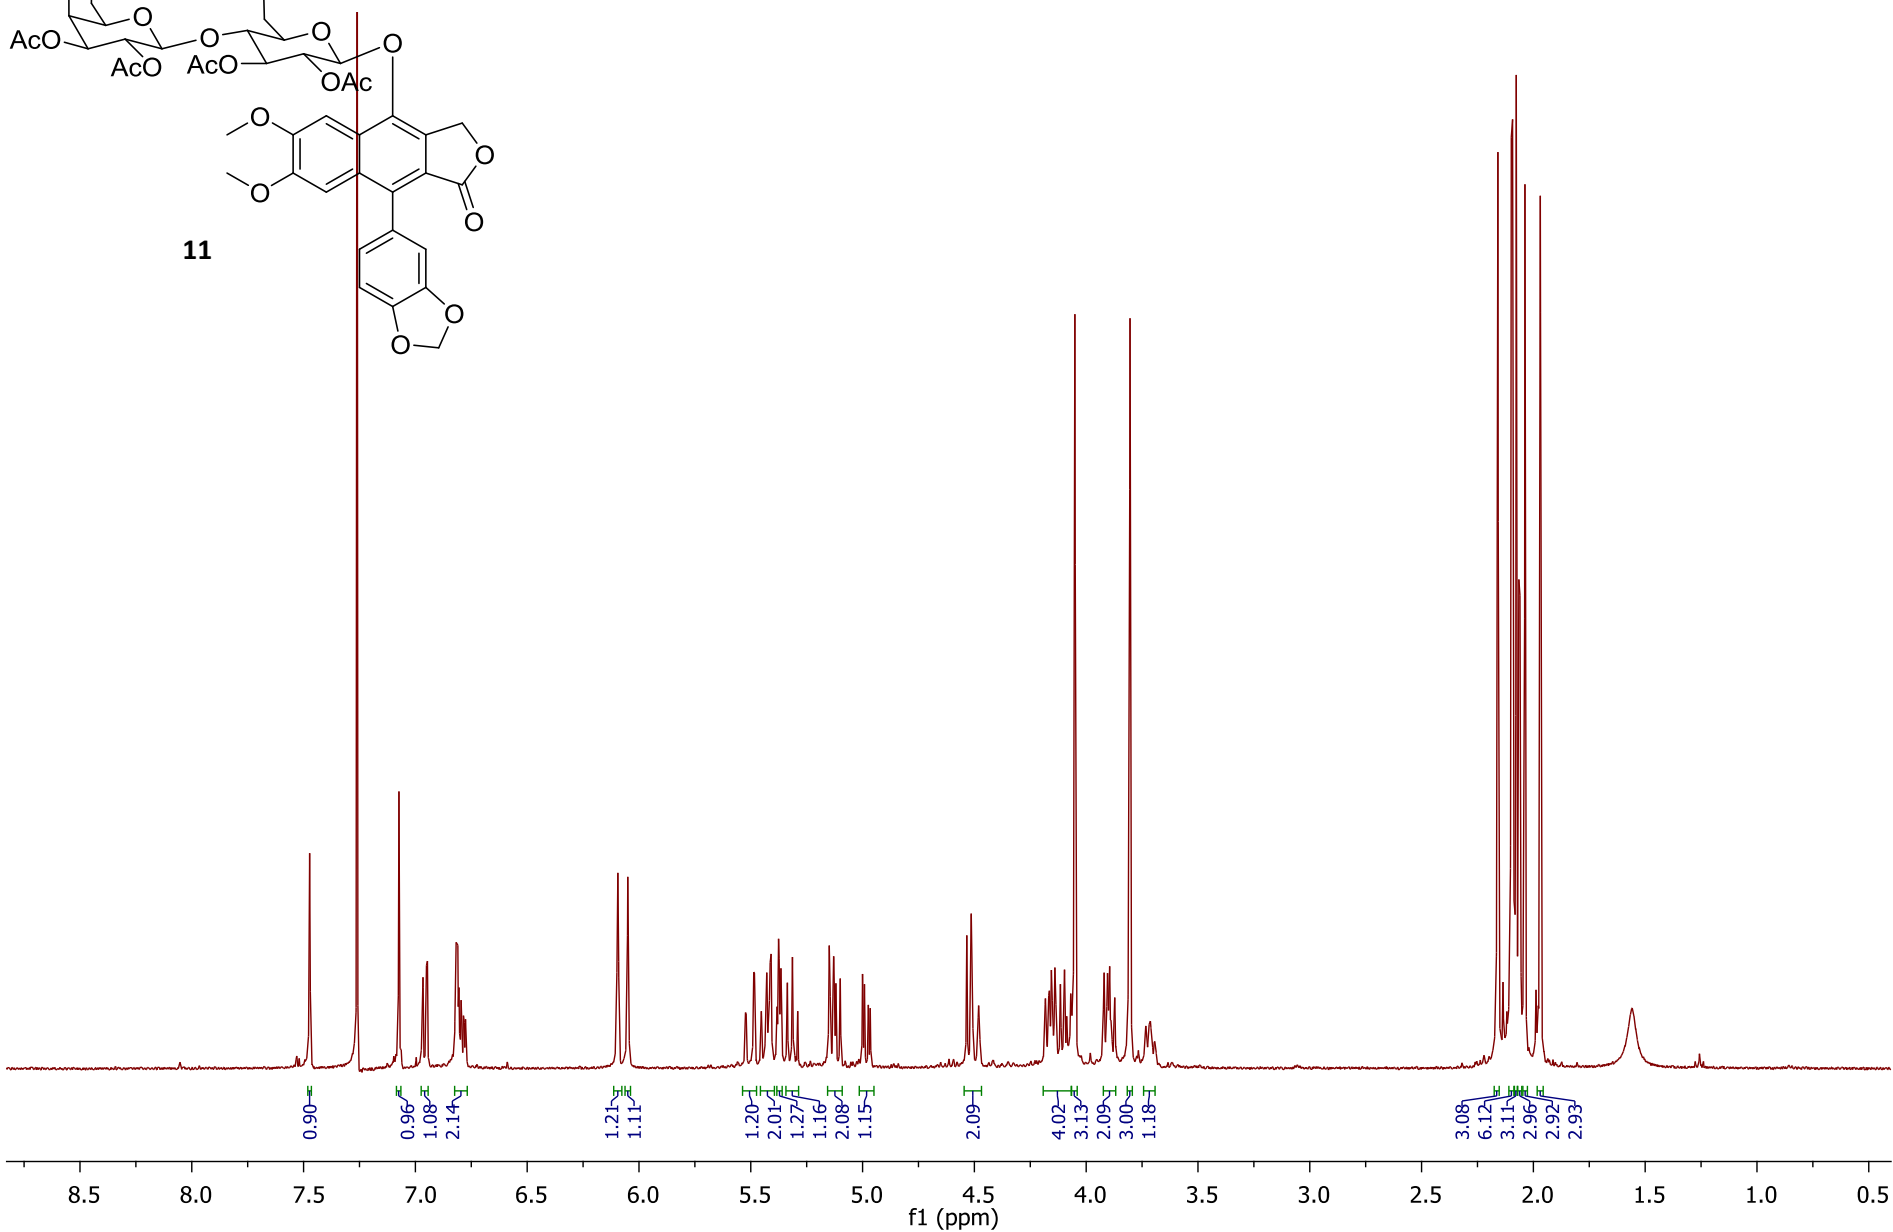

S25

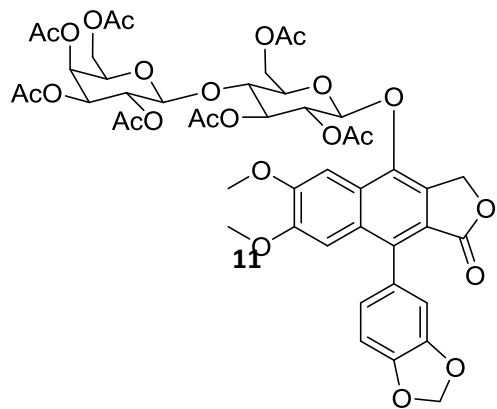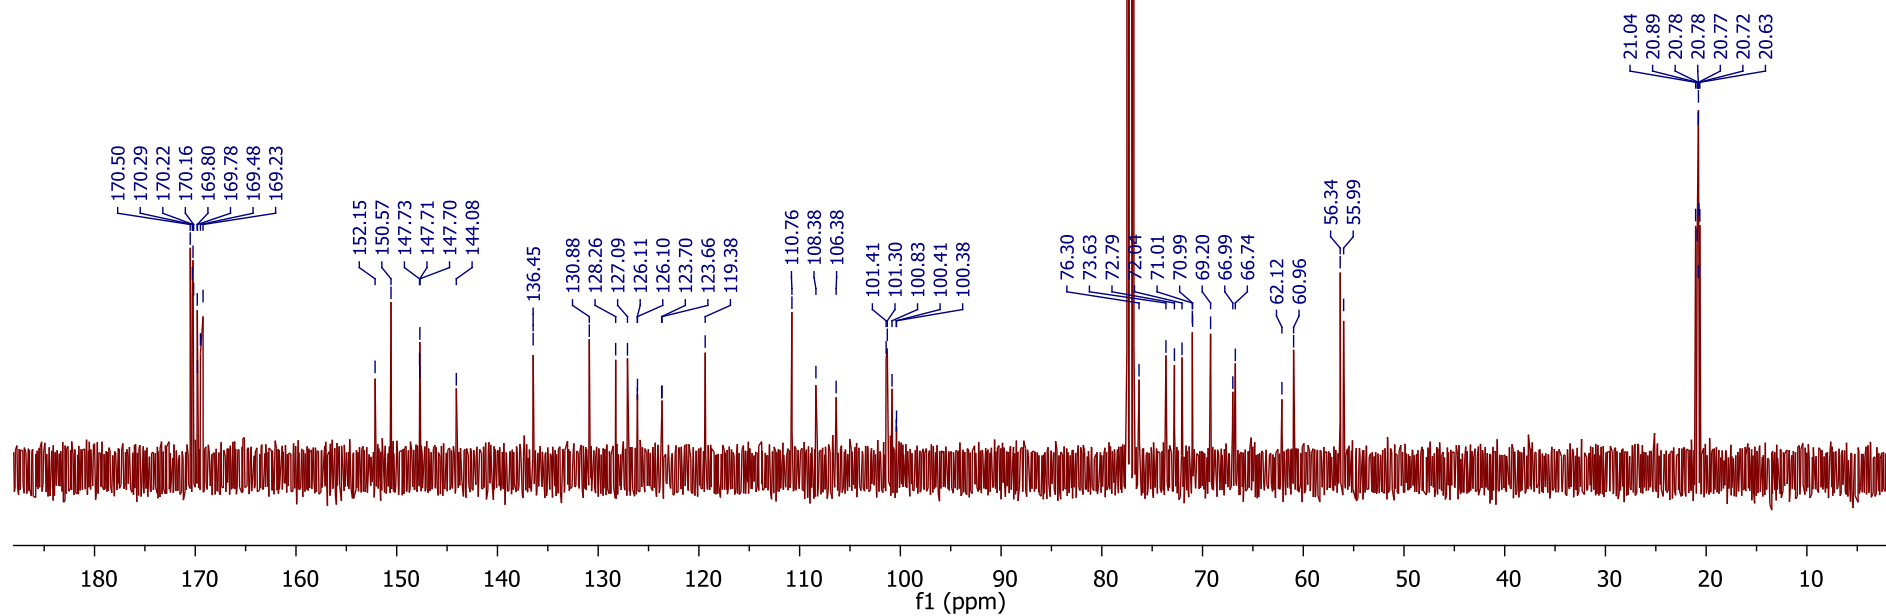





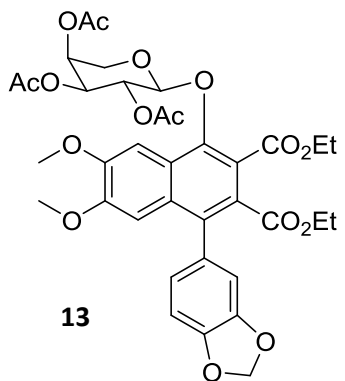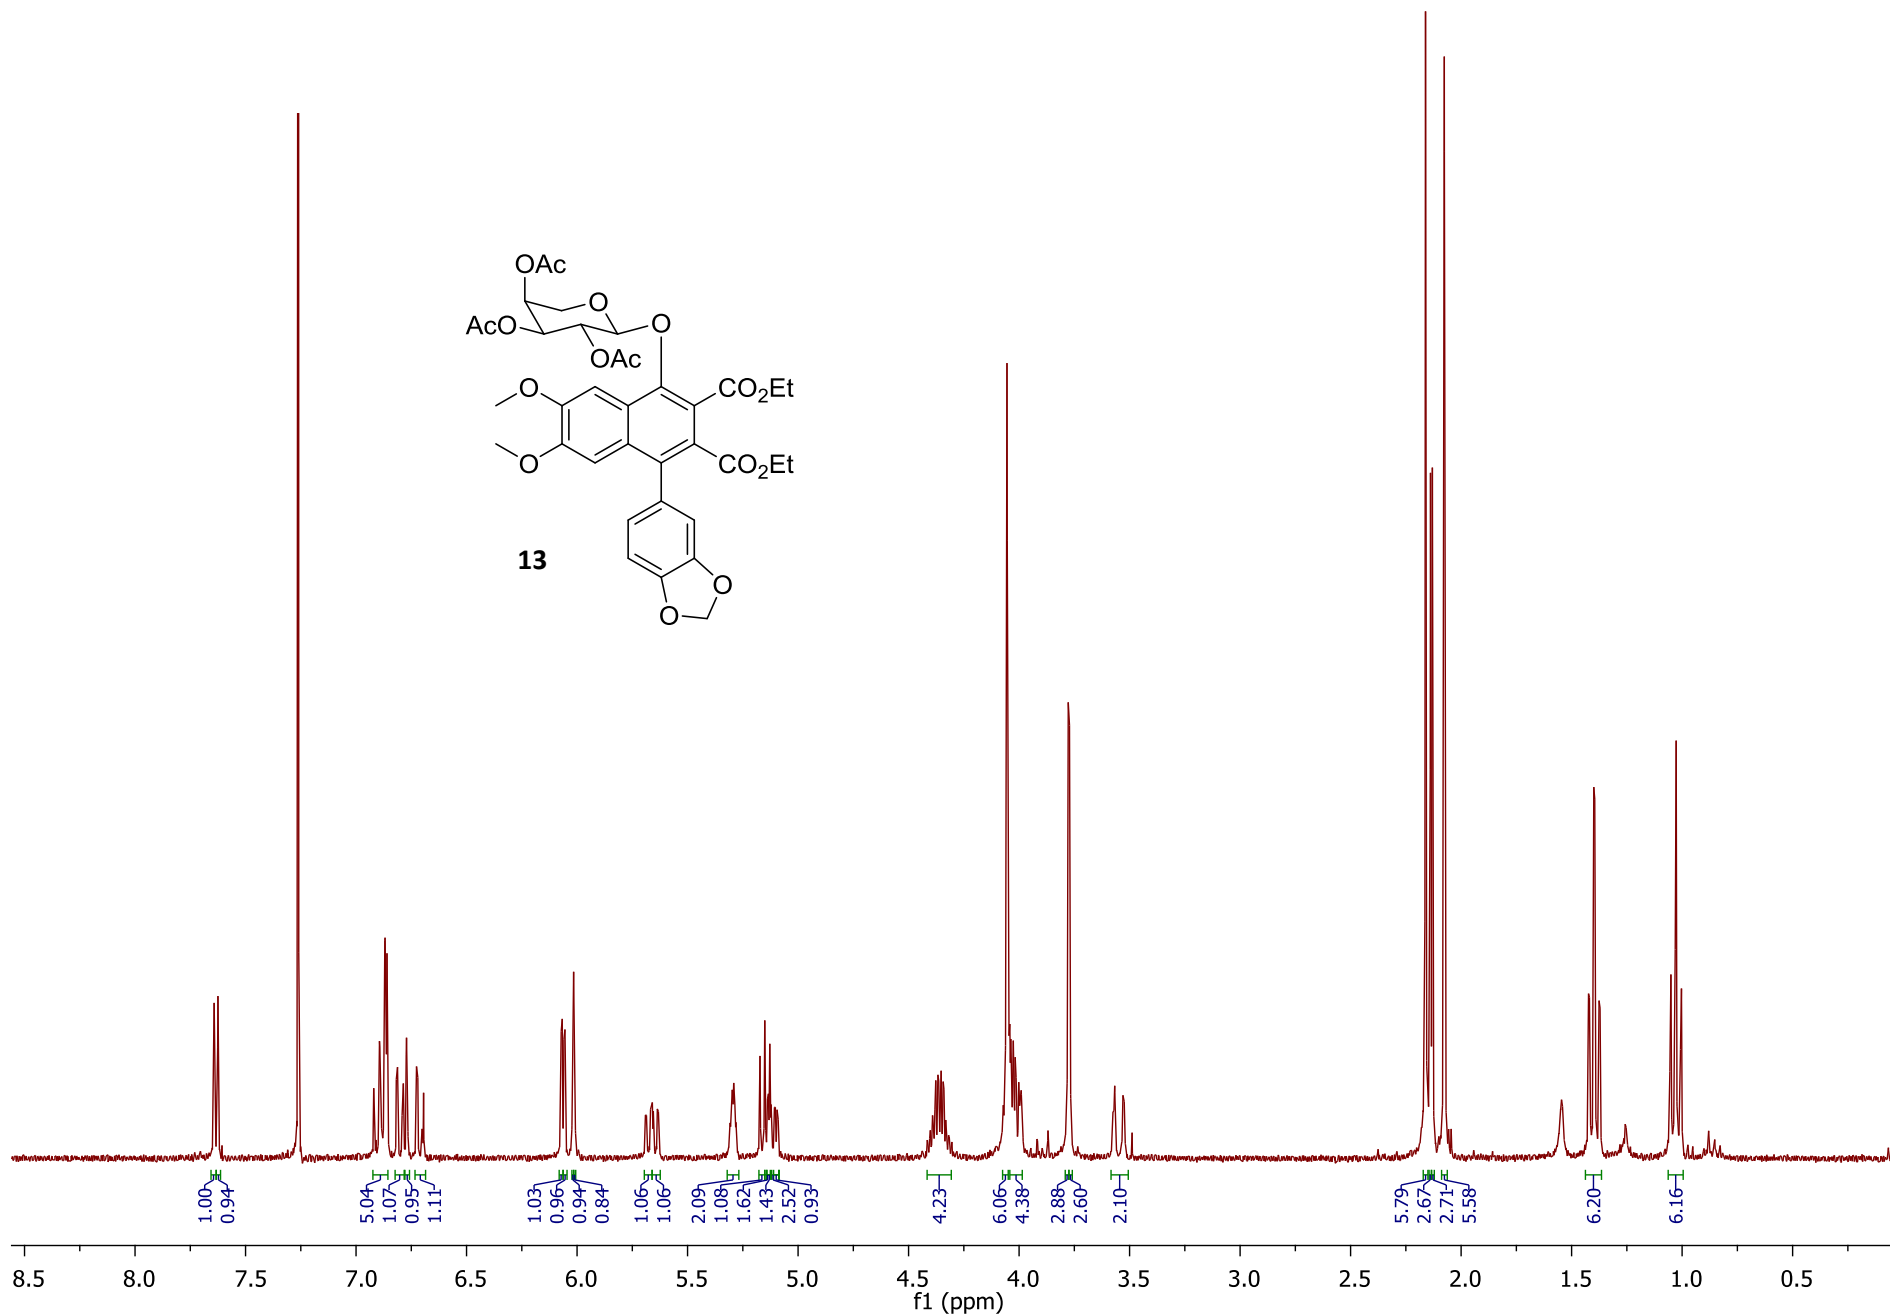

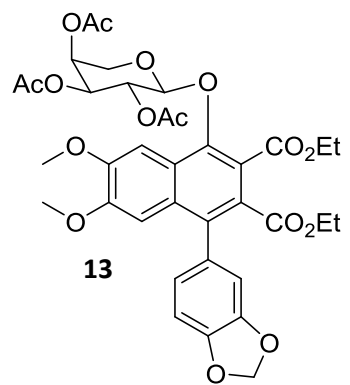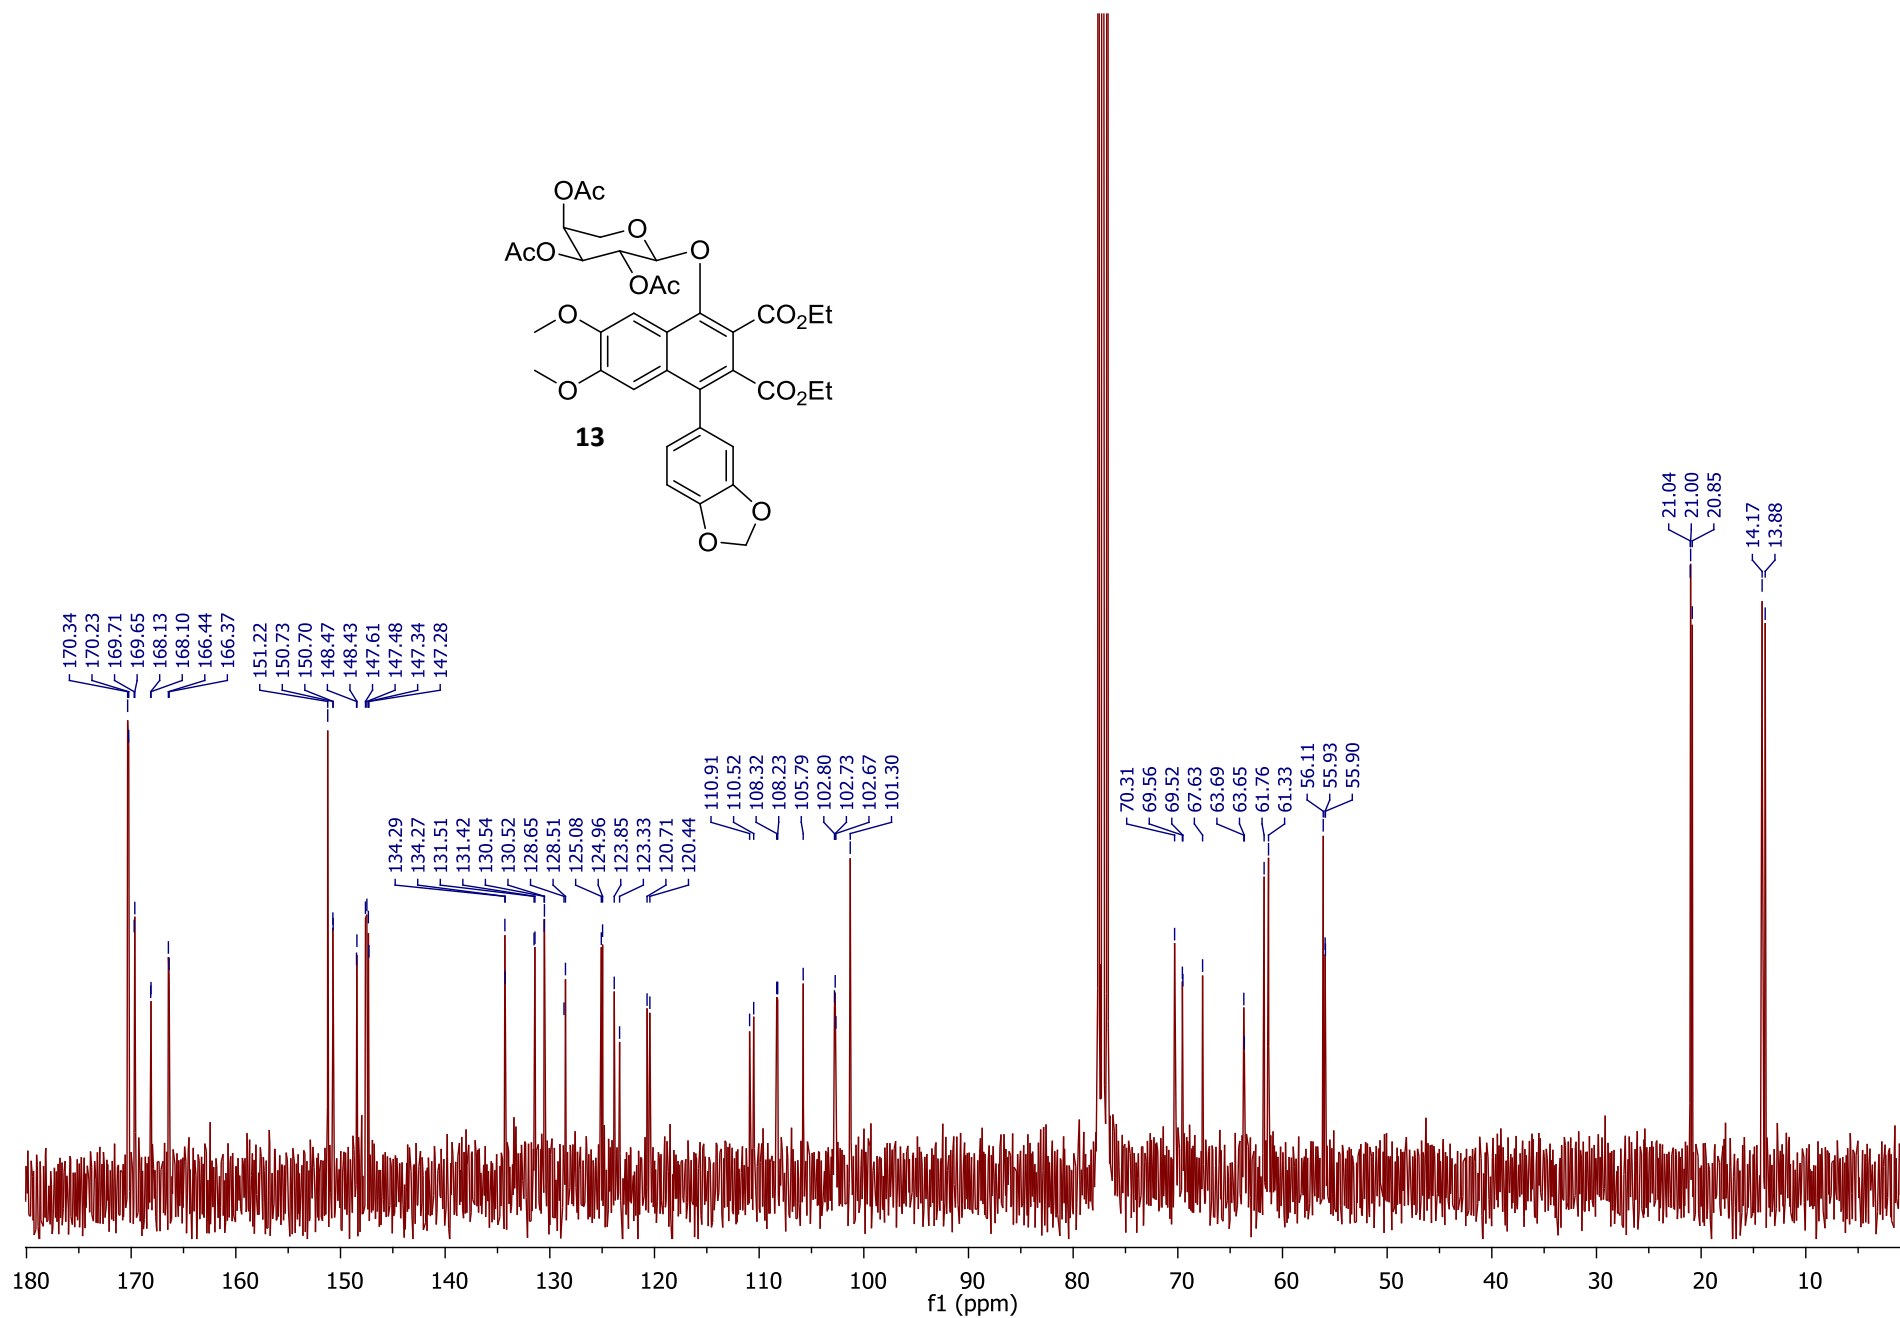

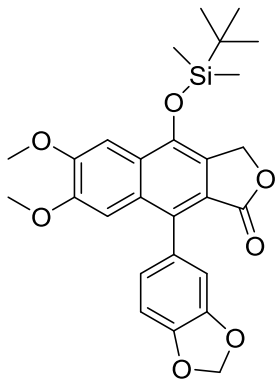

TBS-diphyllin

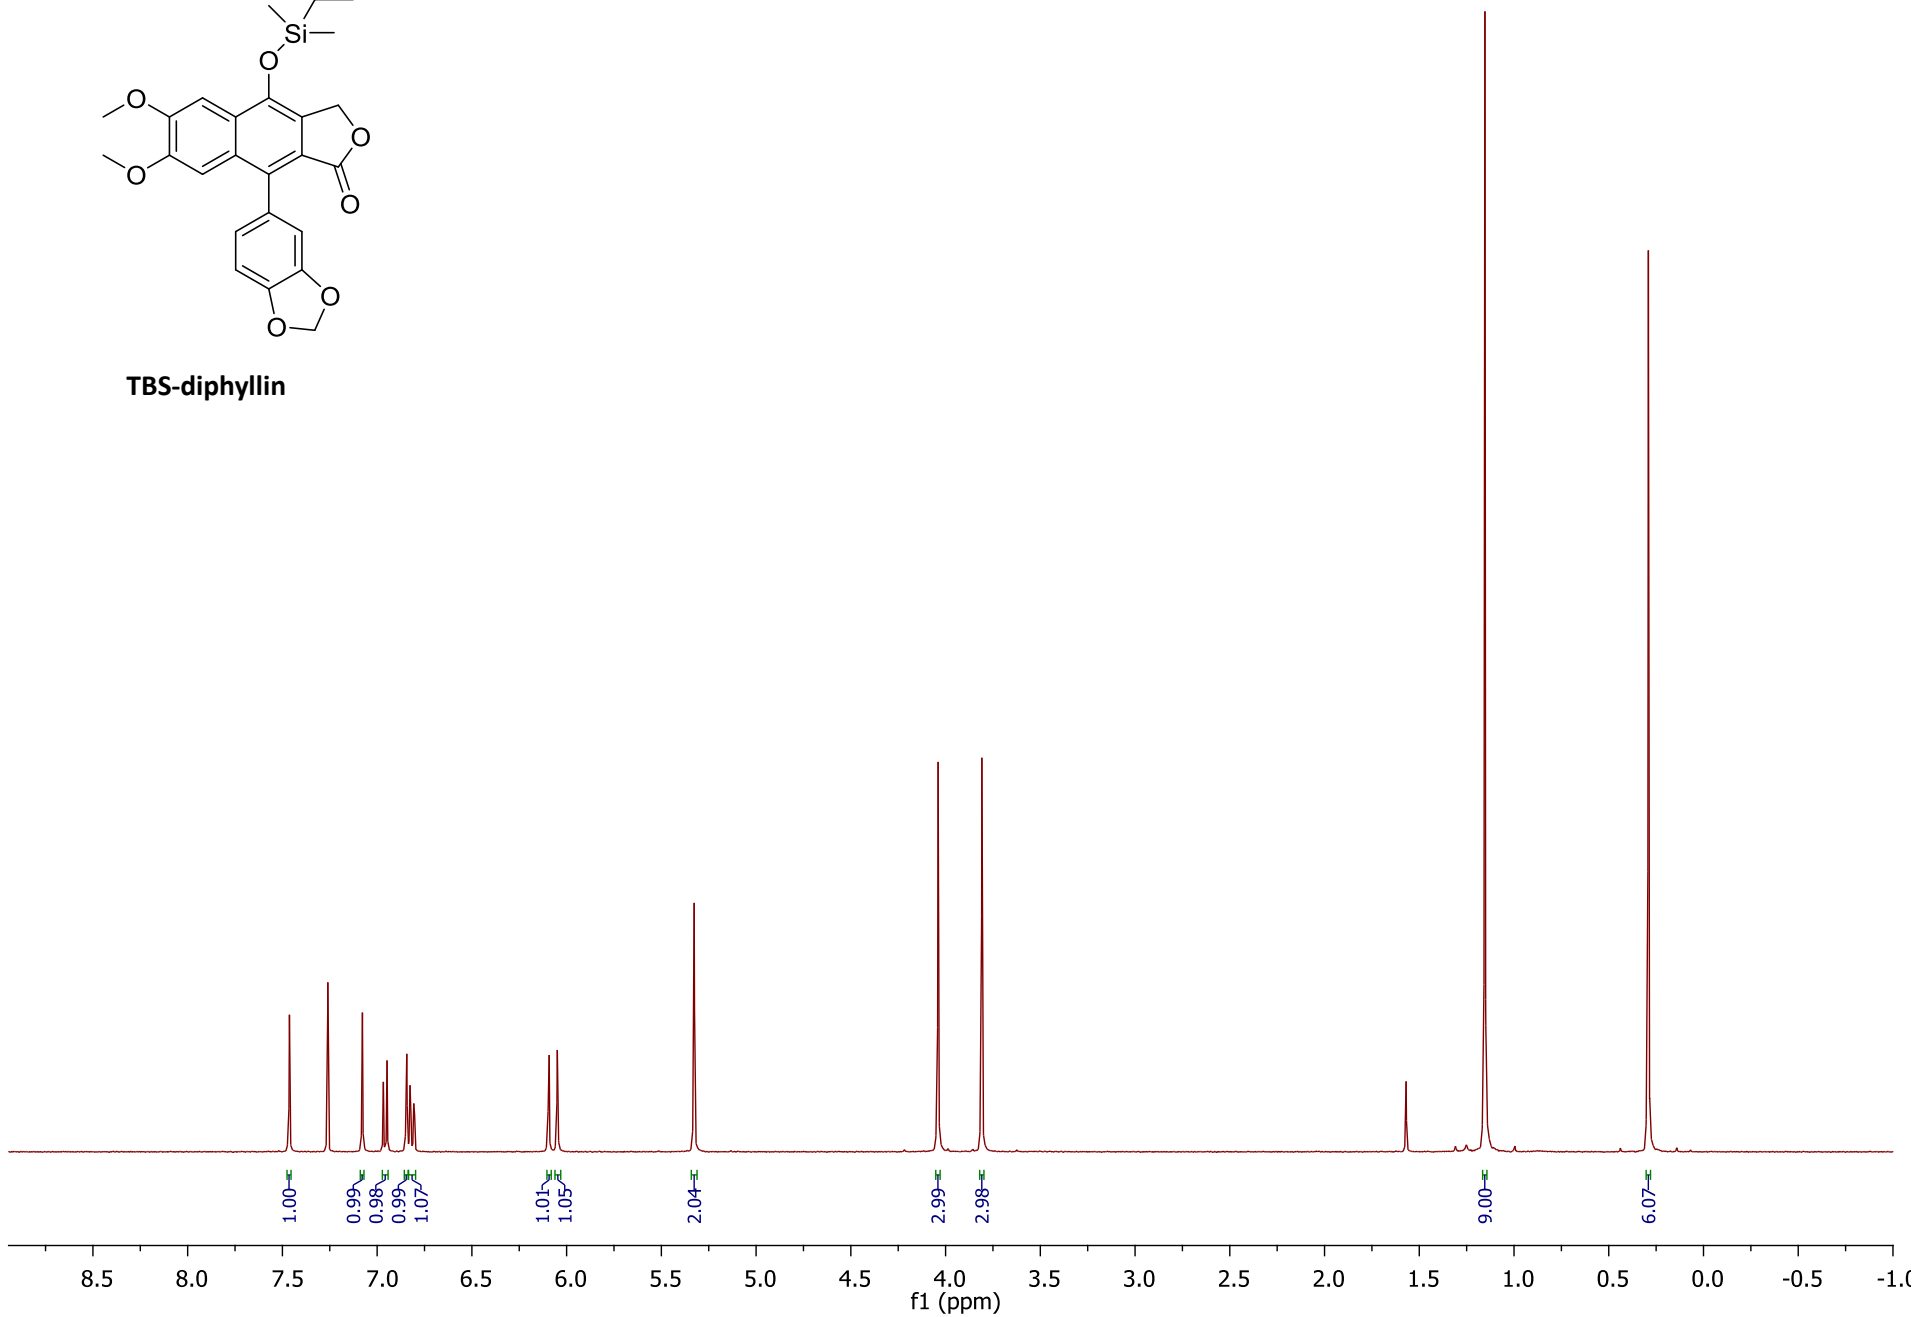

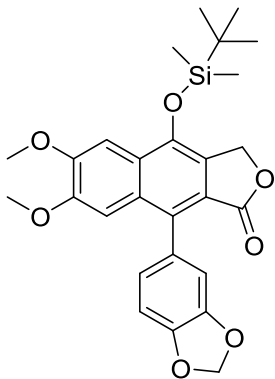

TBS-diphyllin

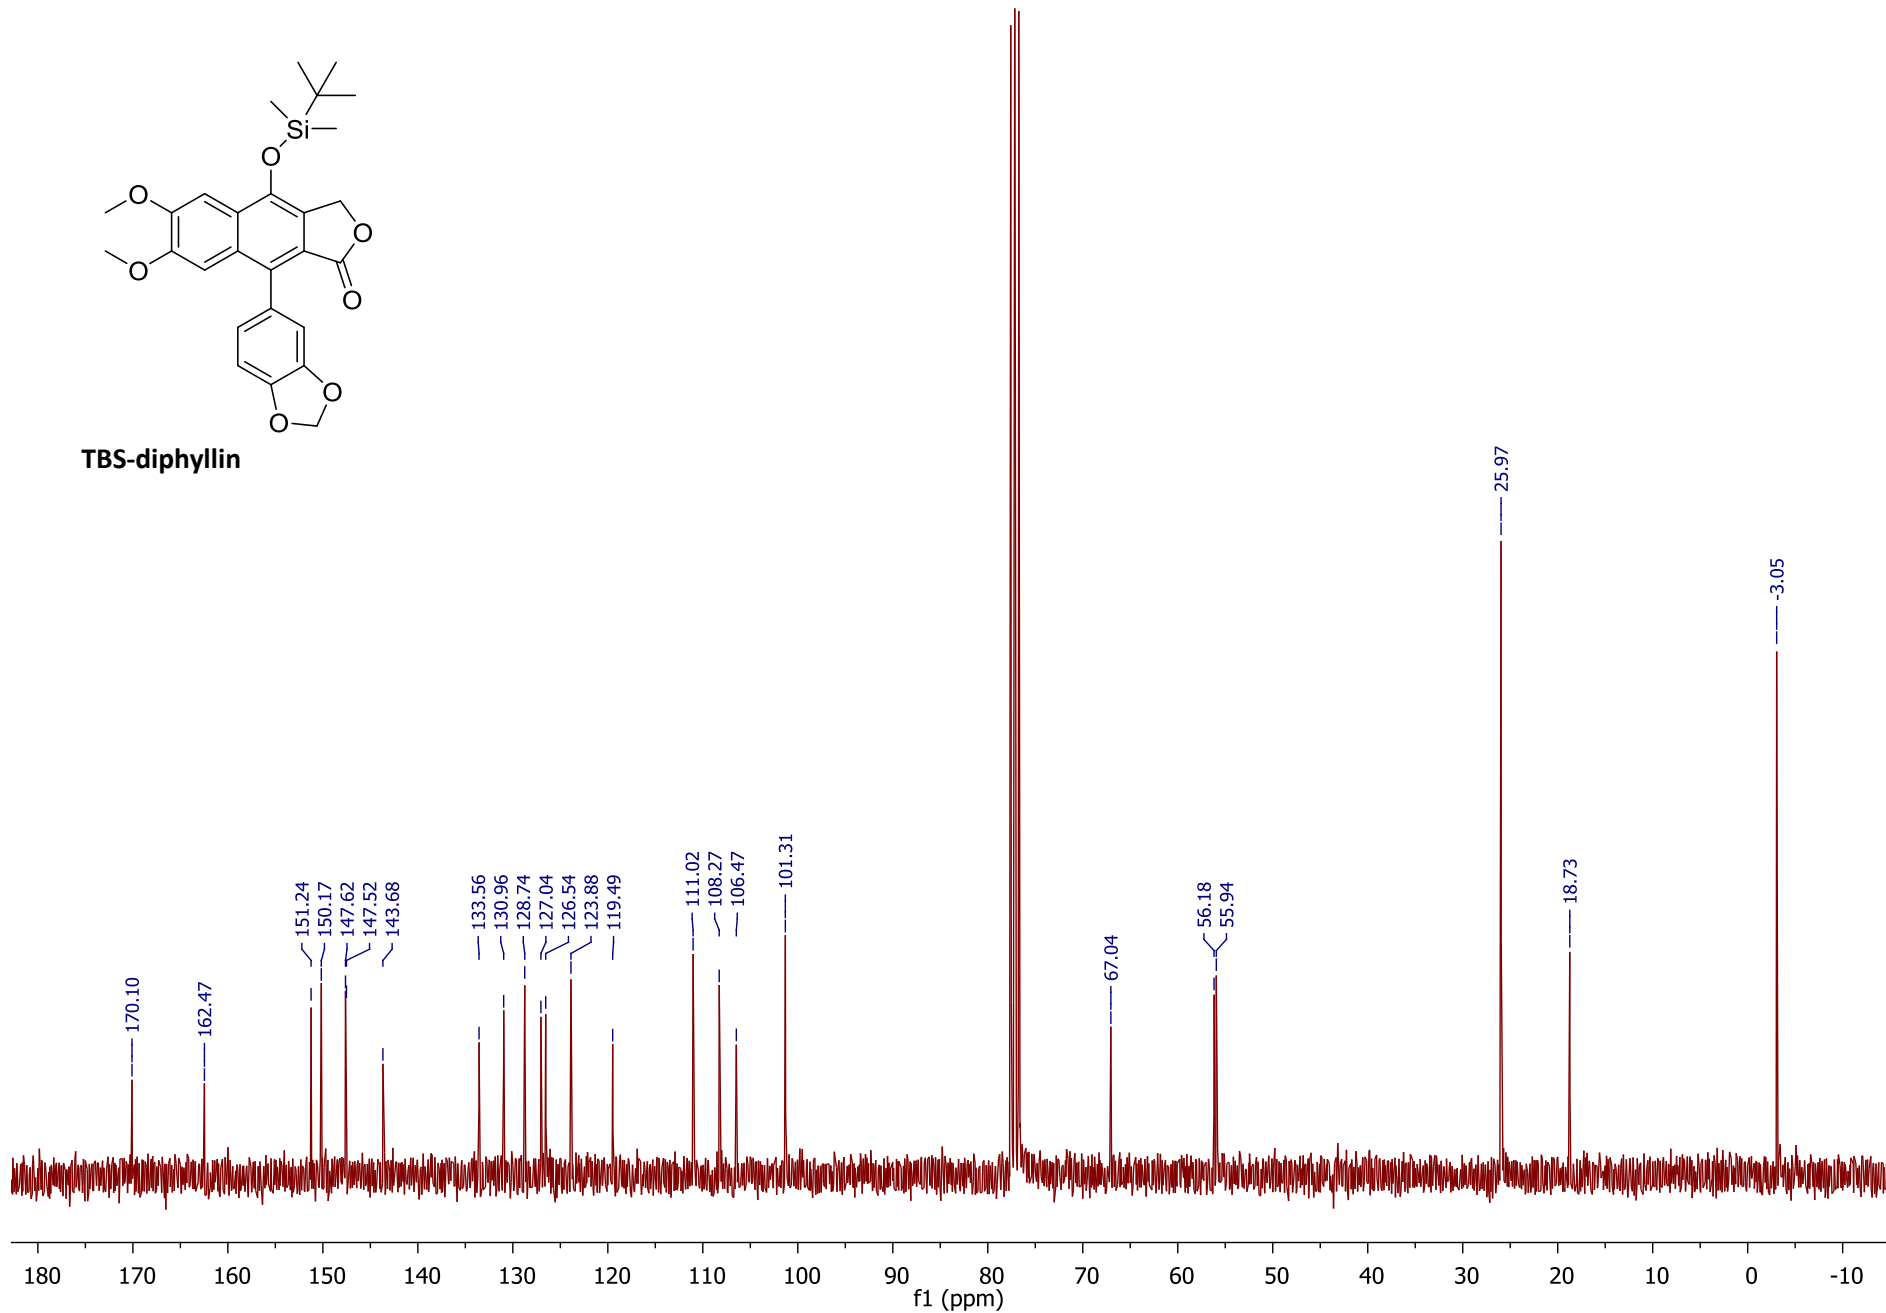



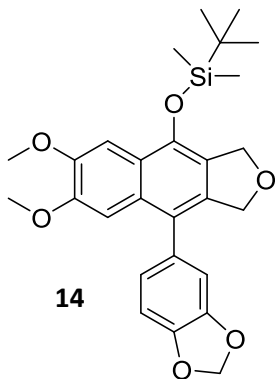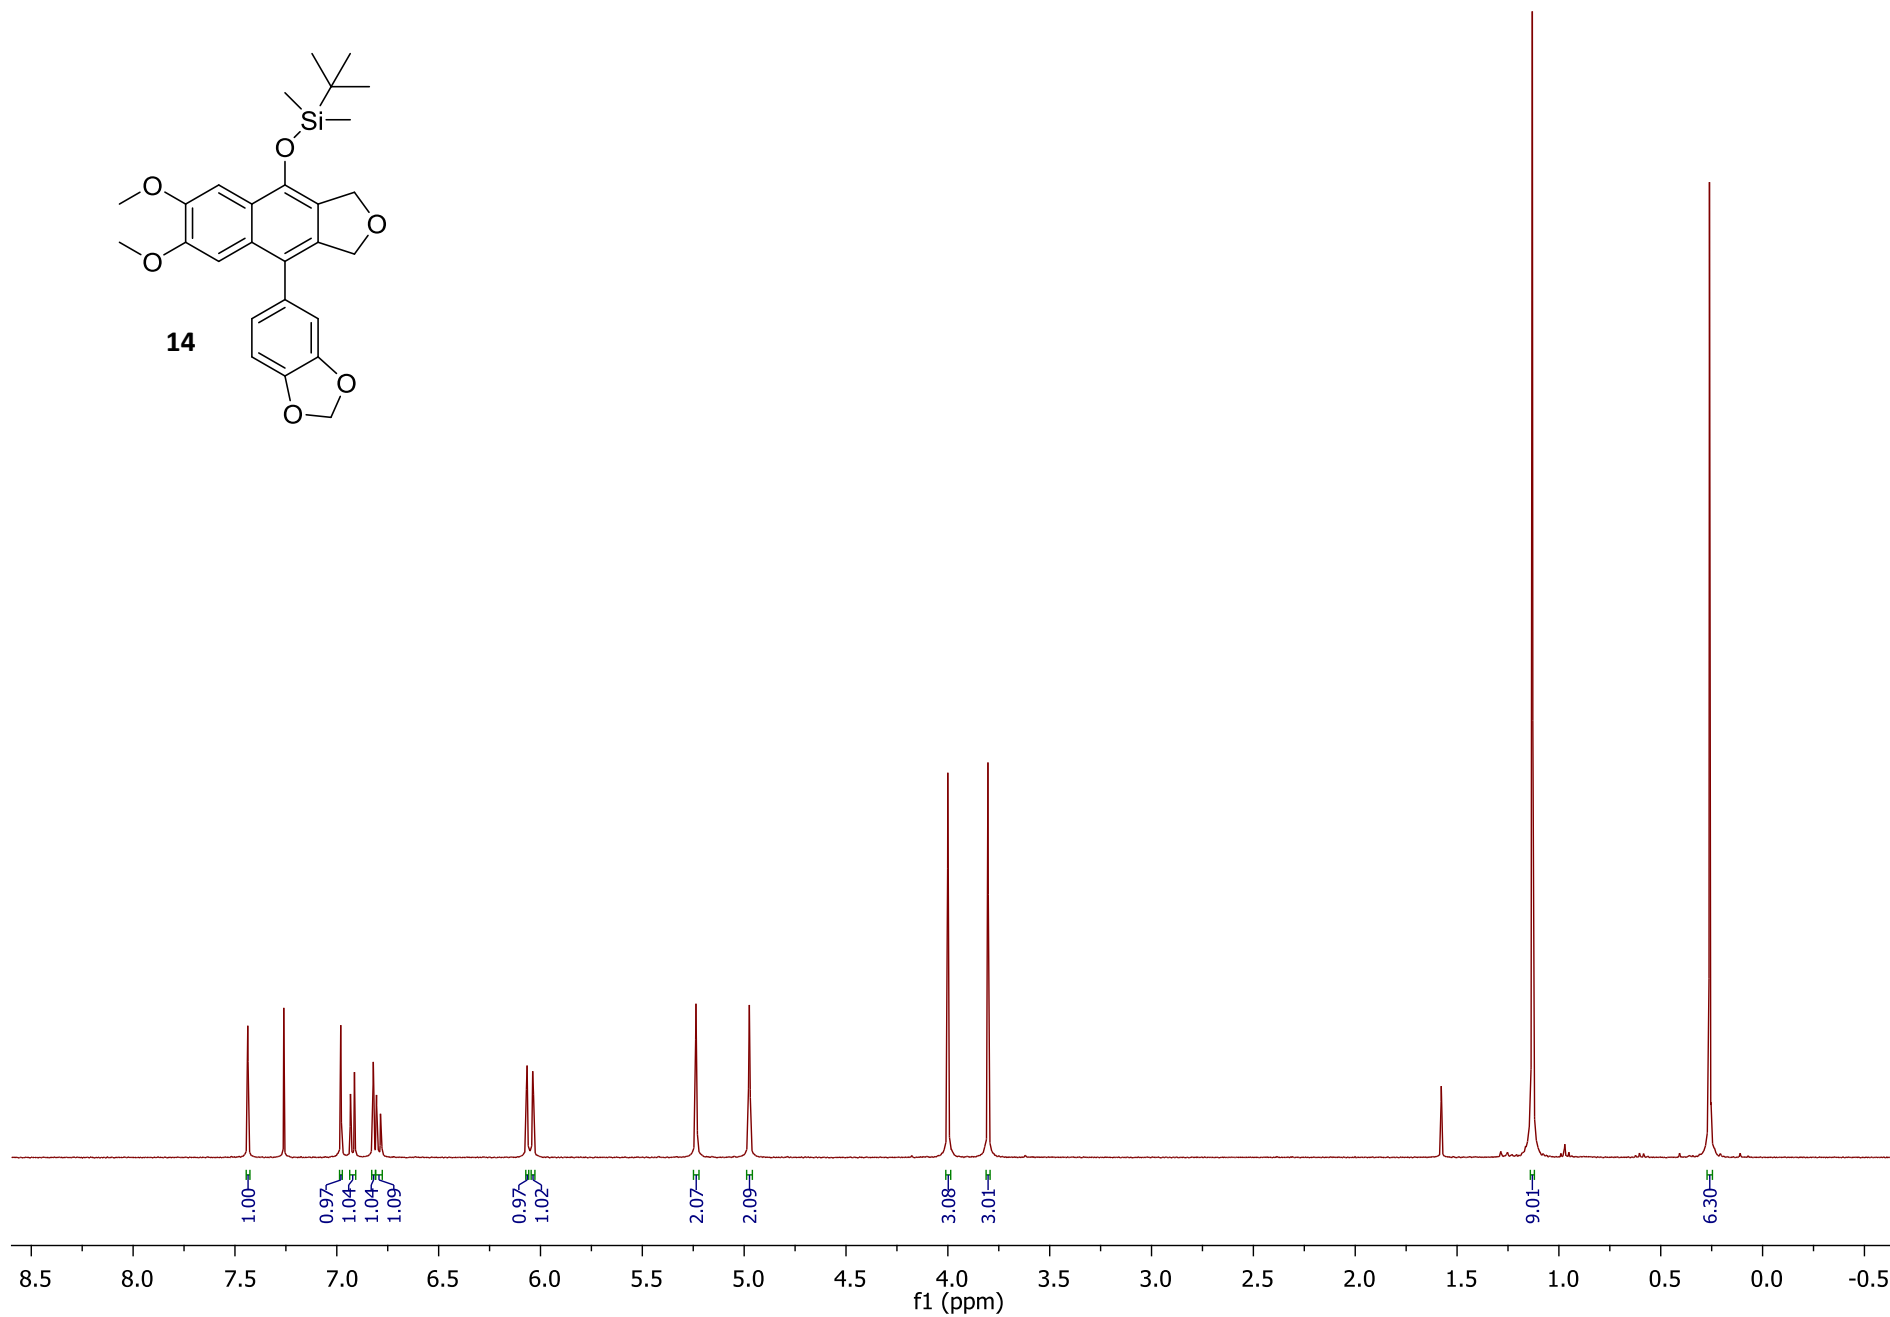

S33

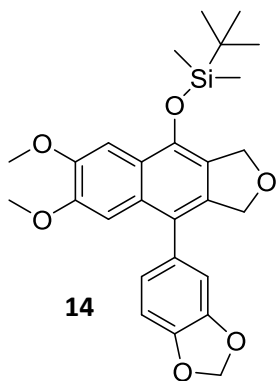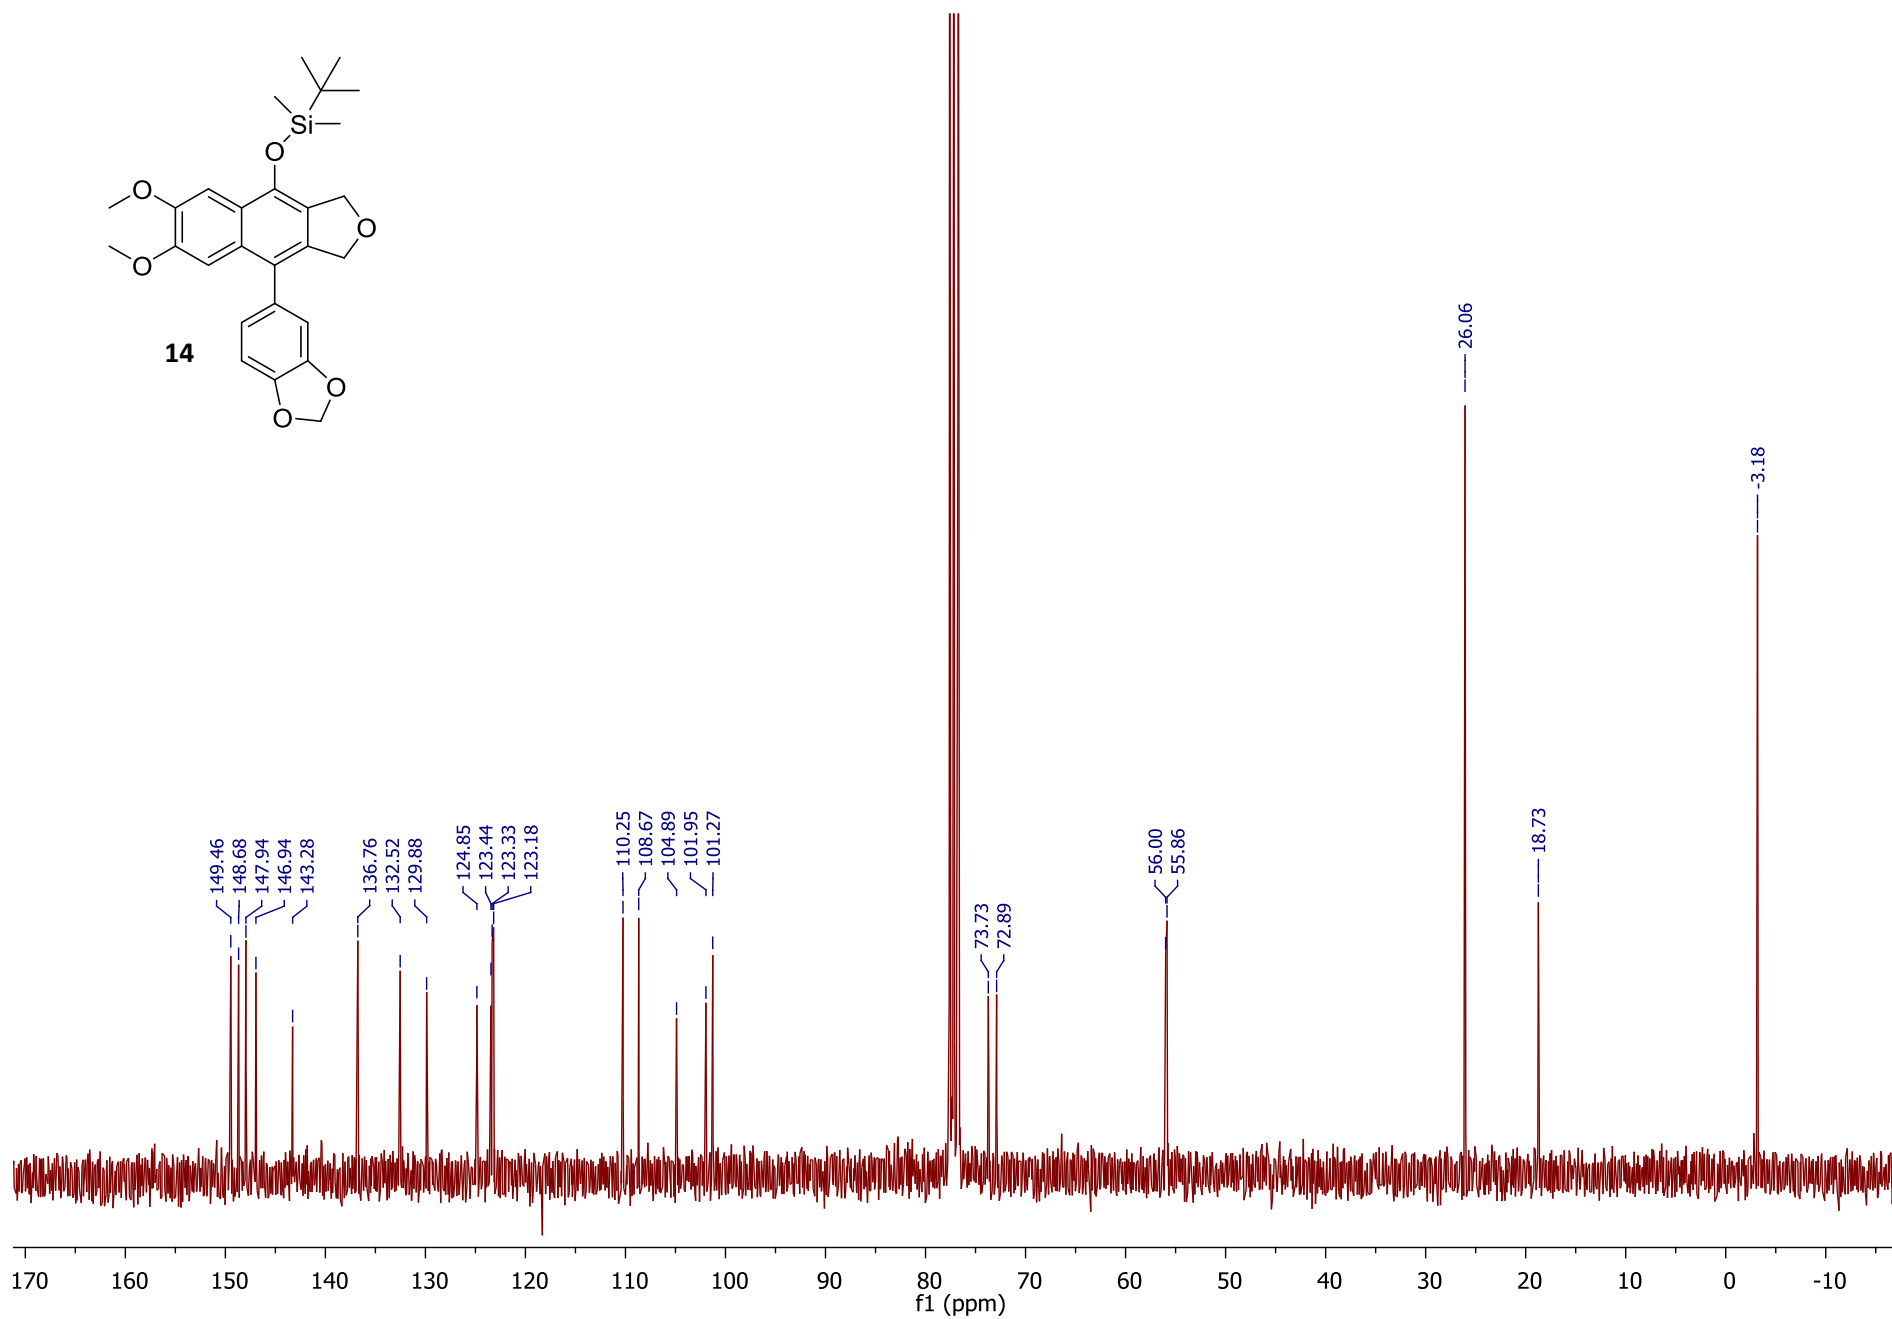

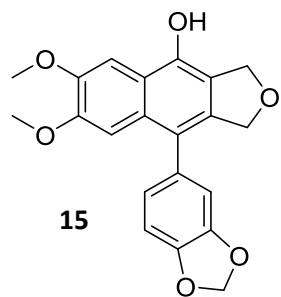

15

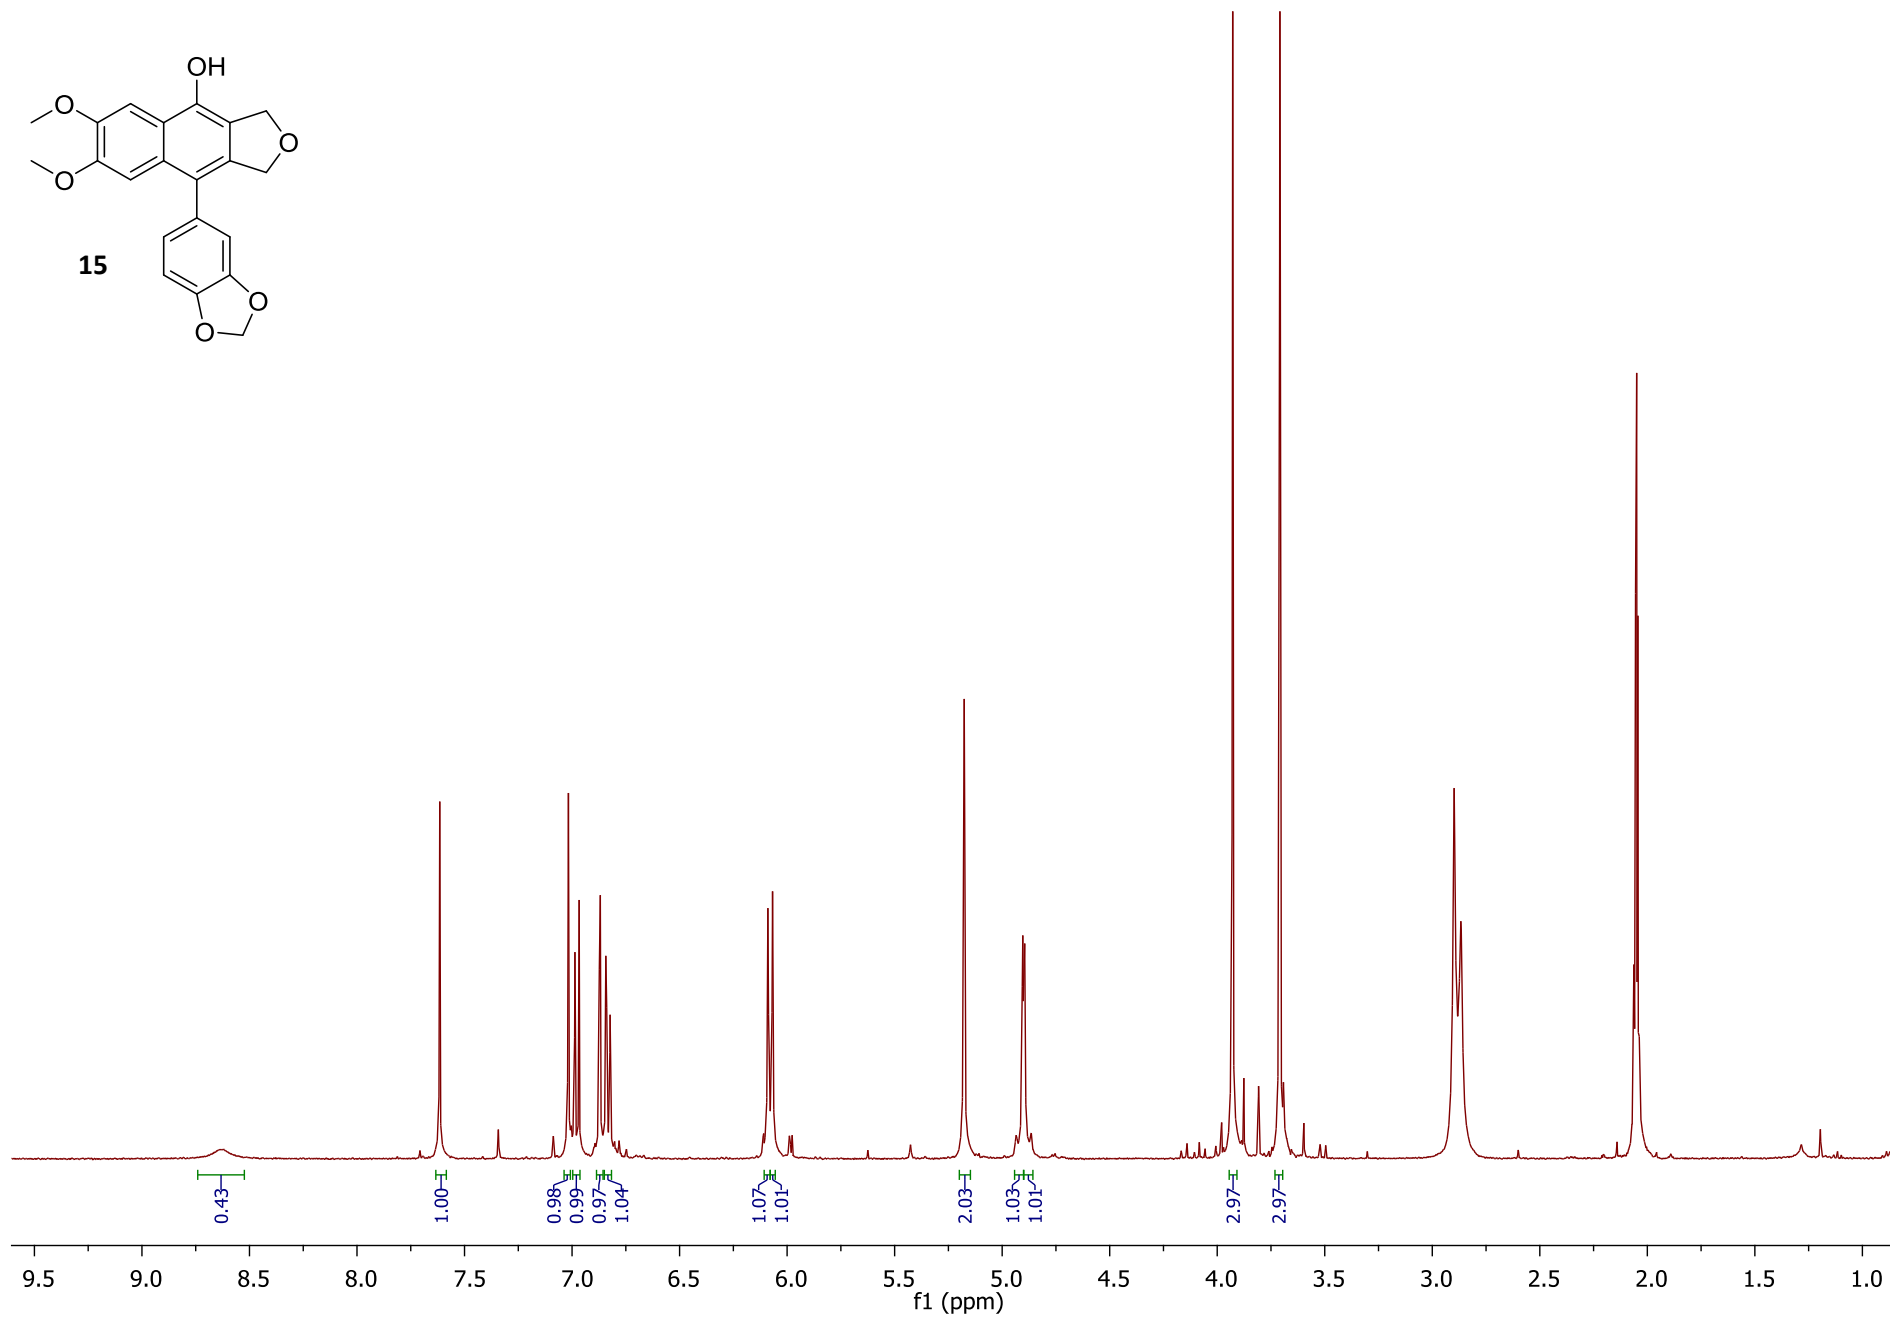

S35

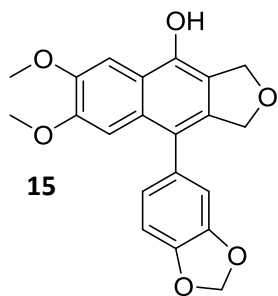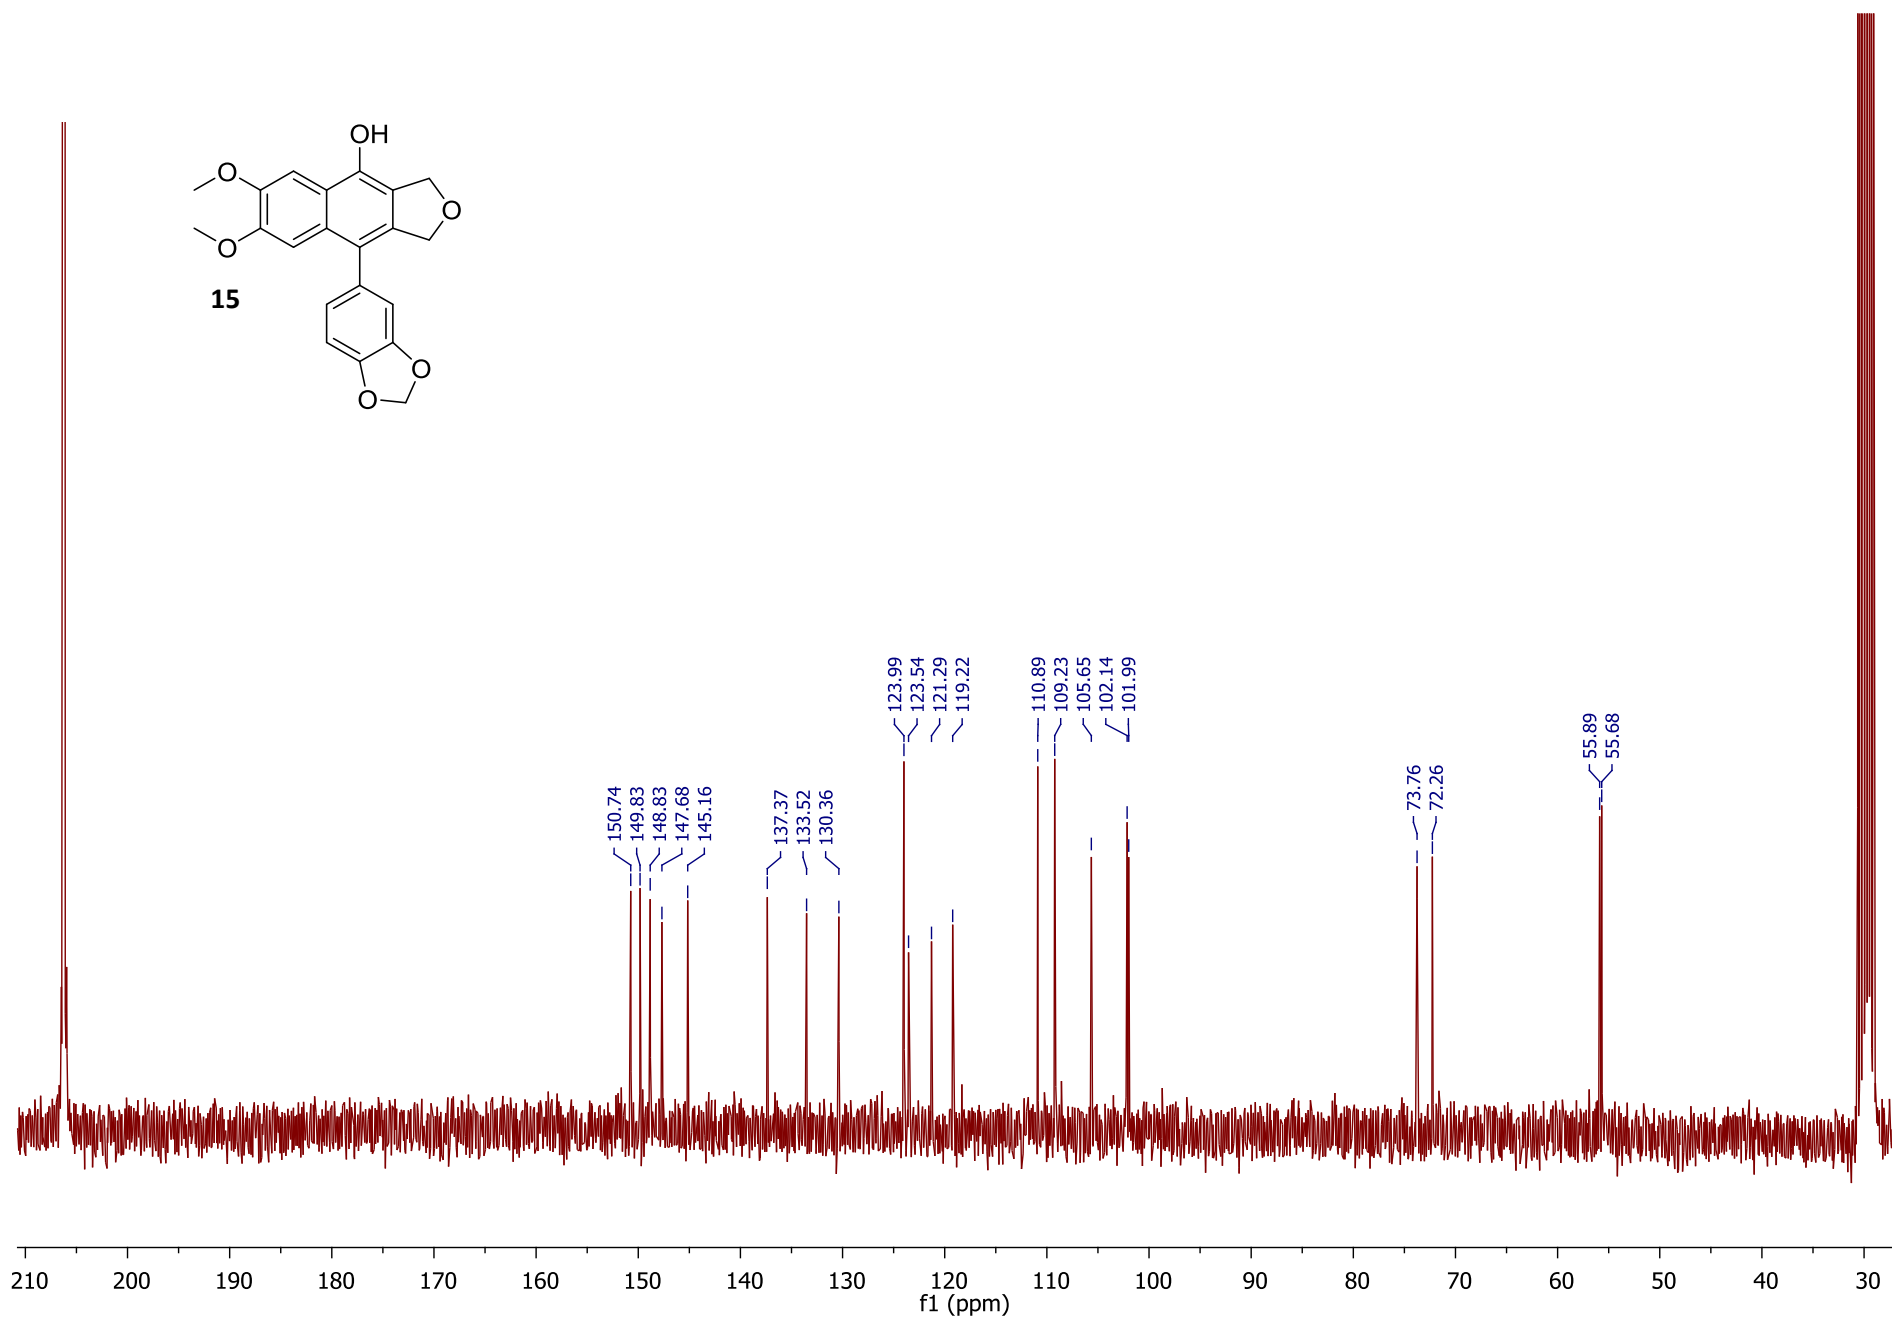

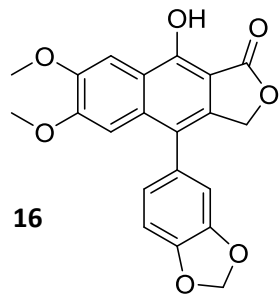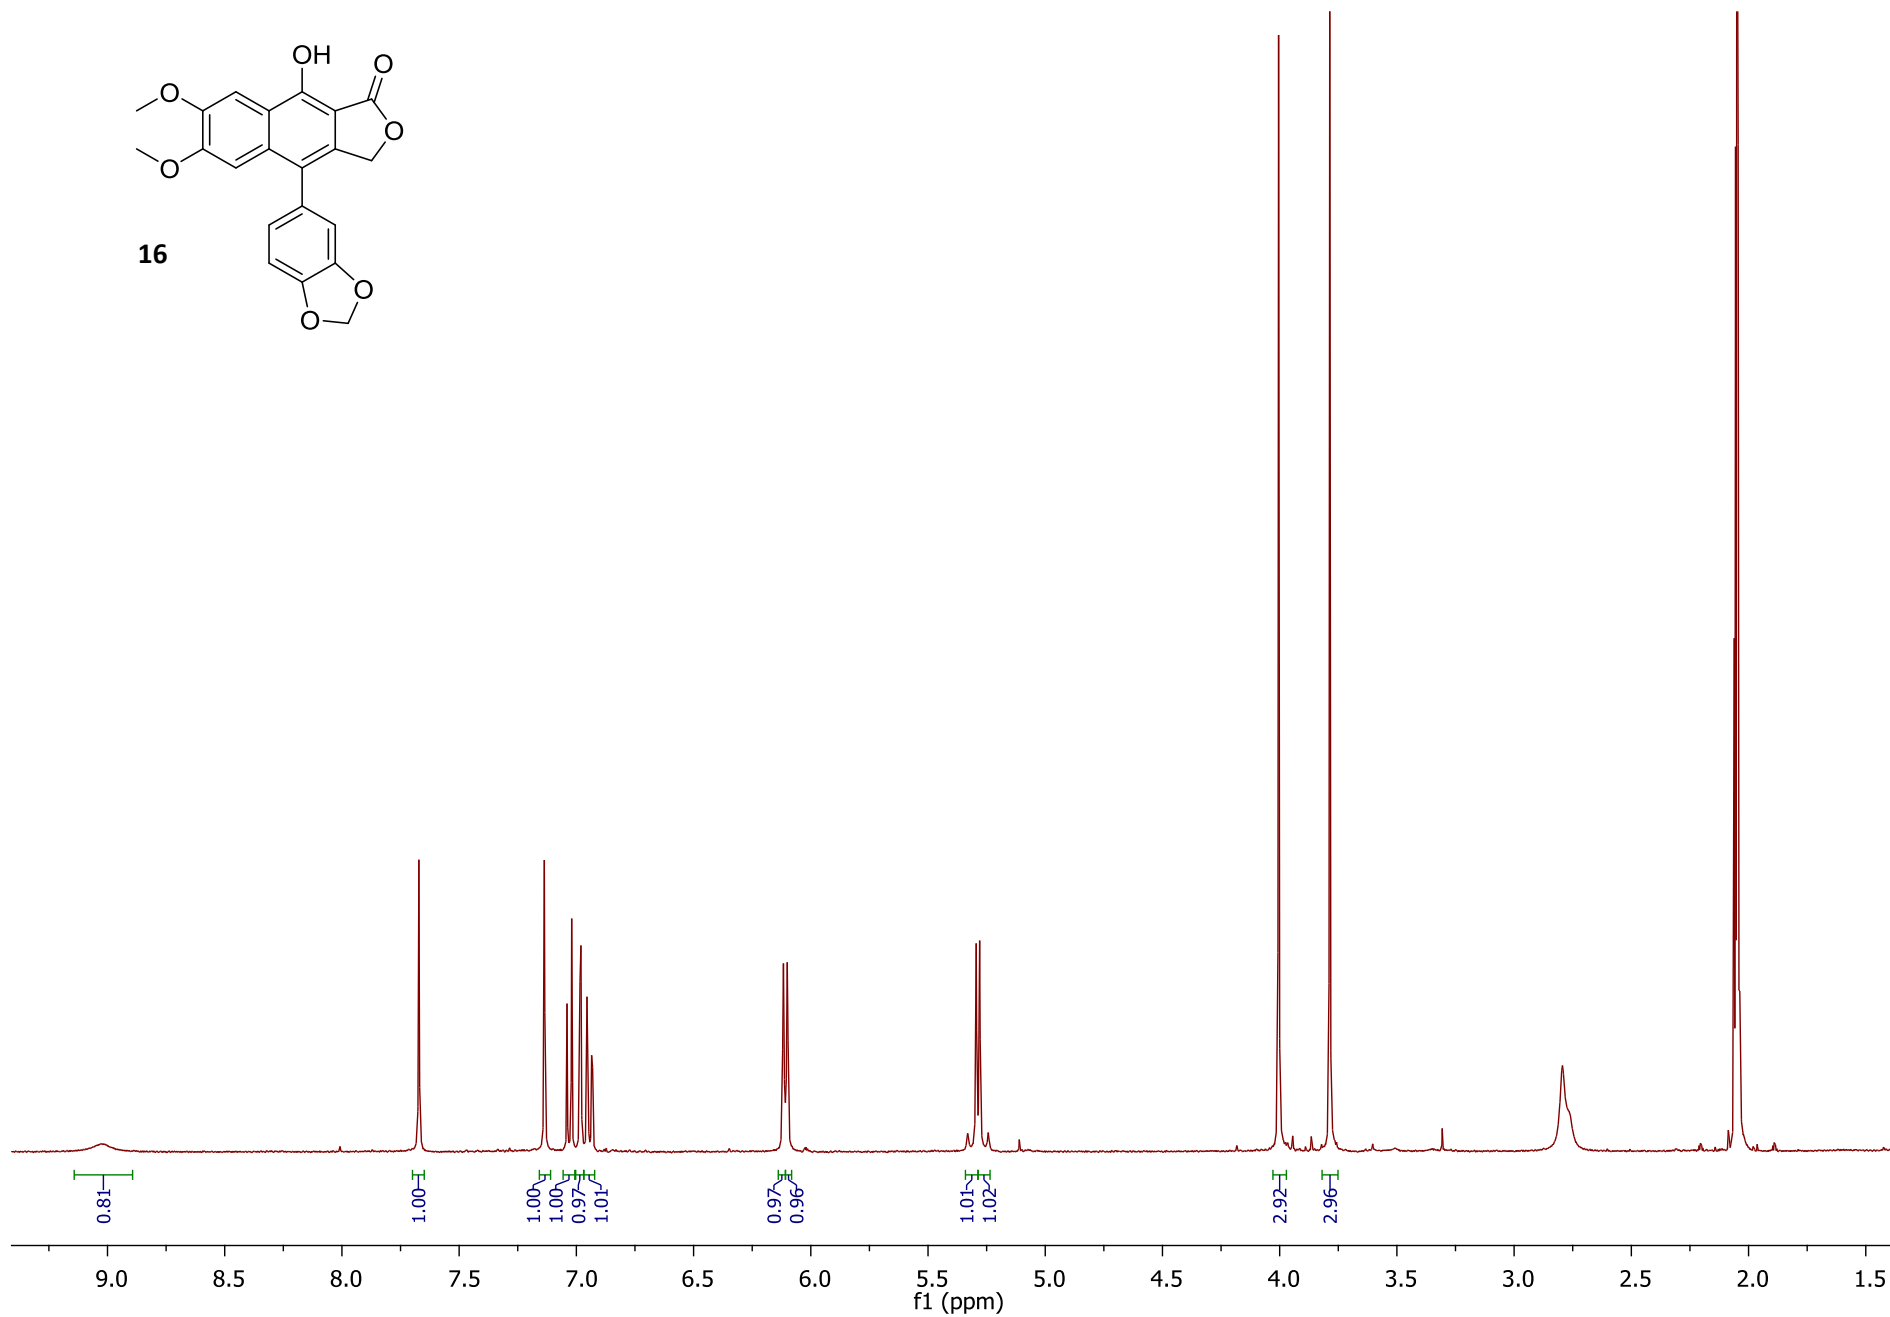

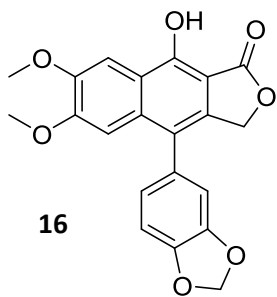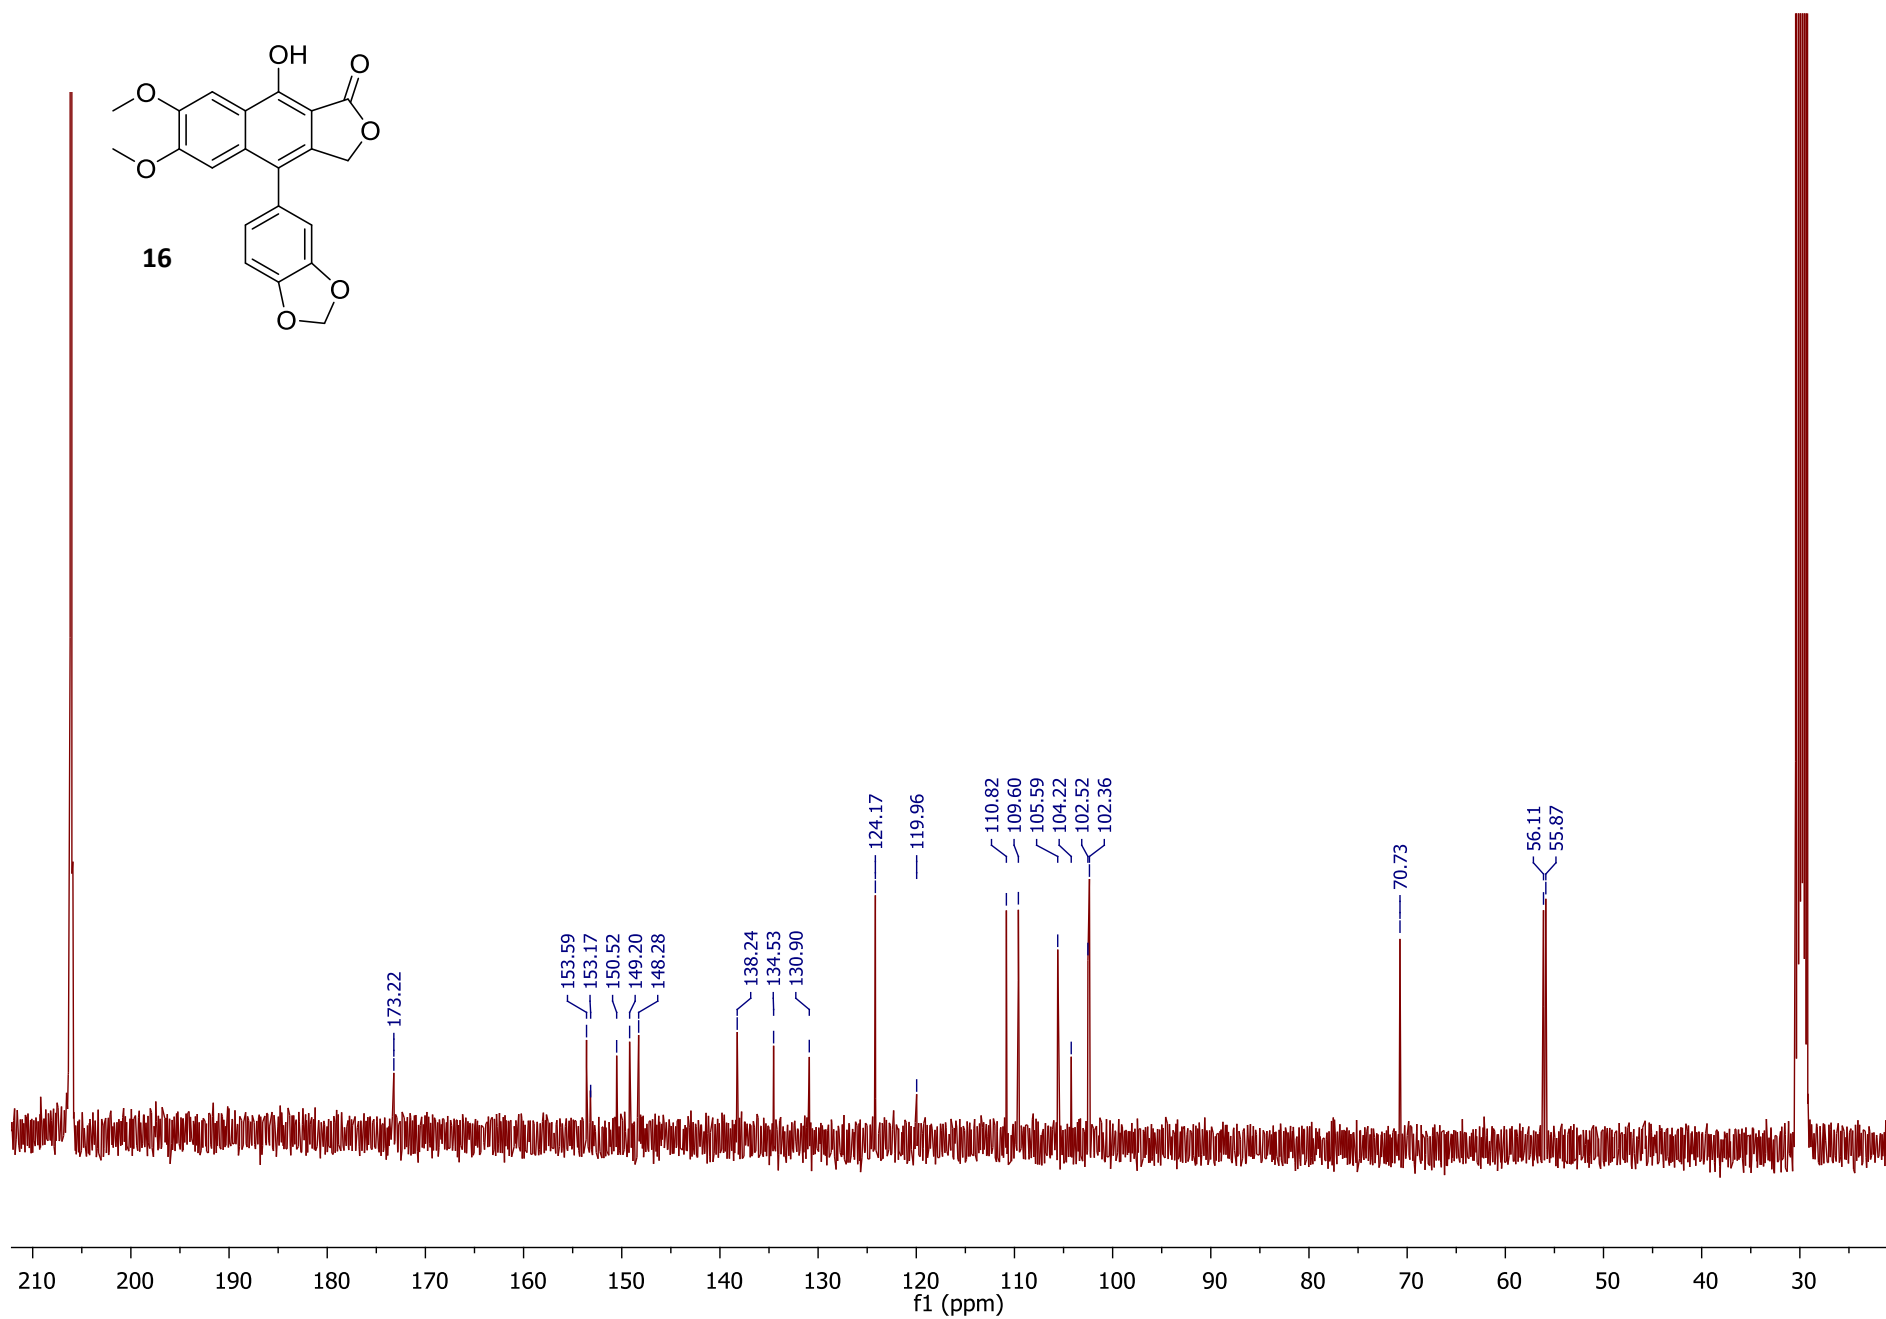

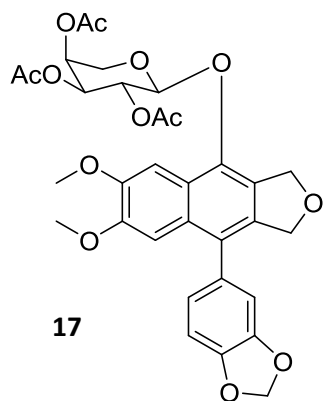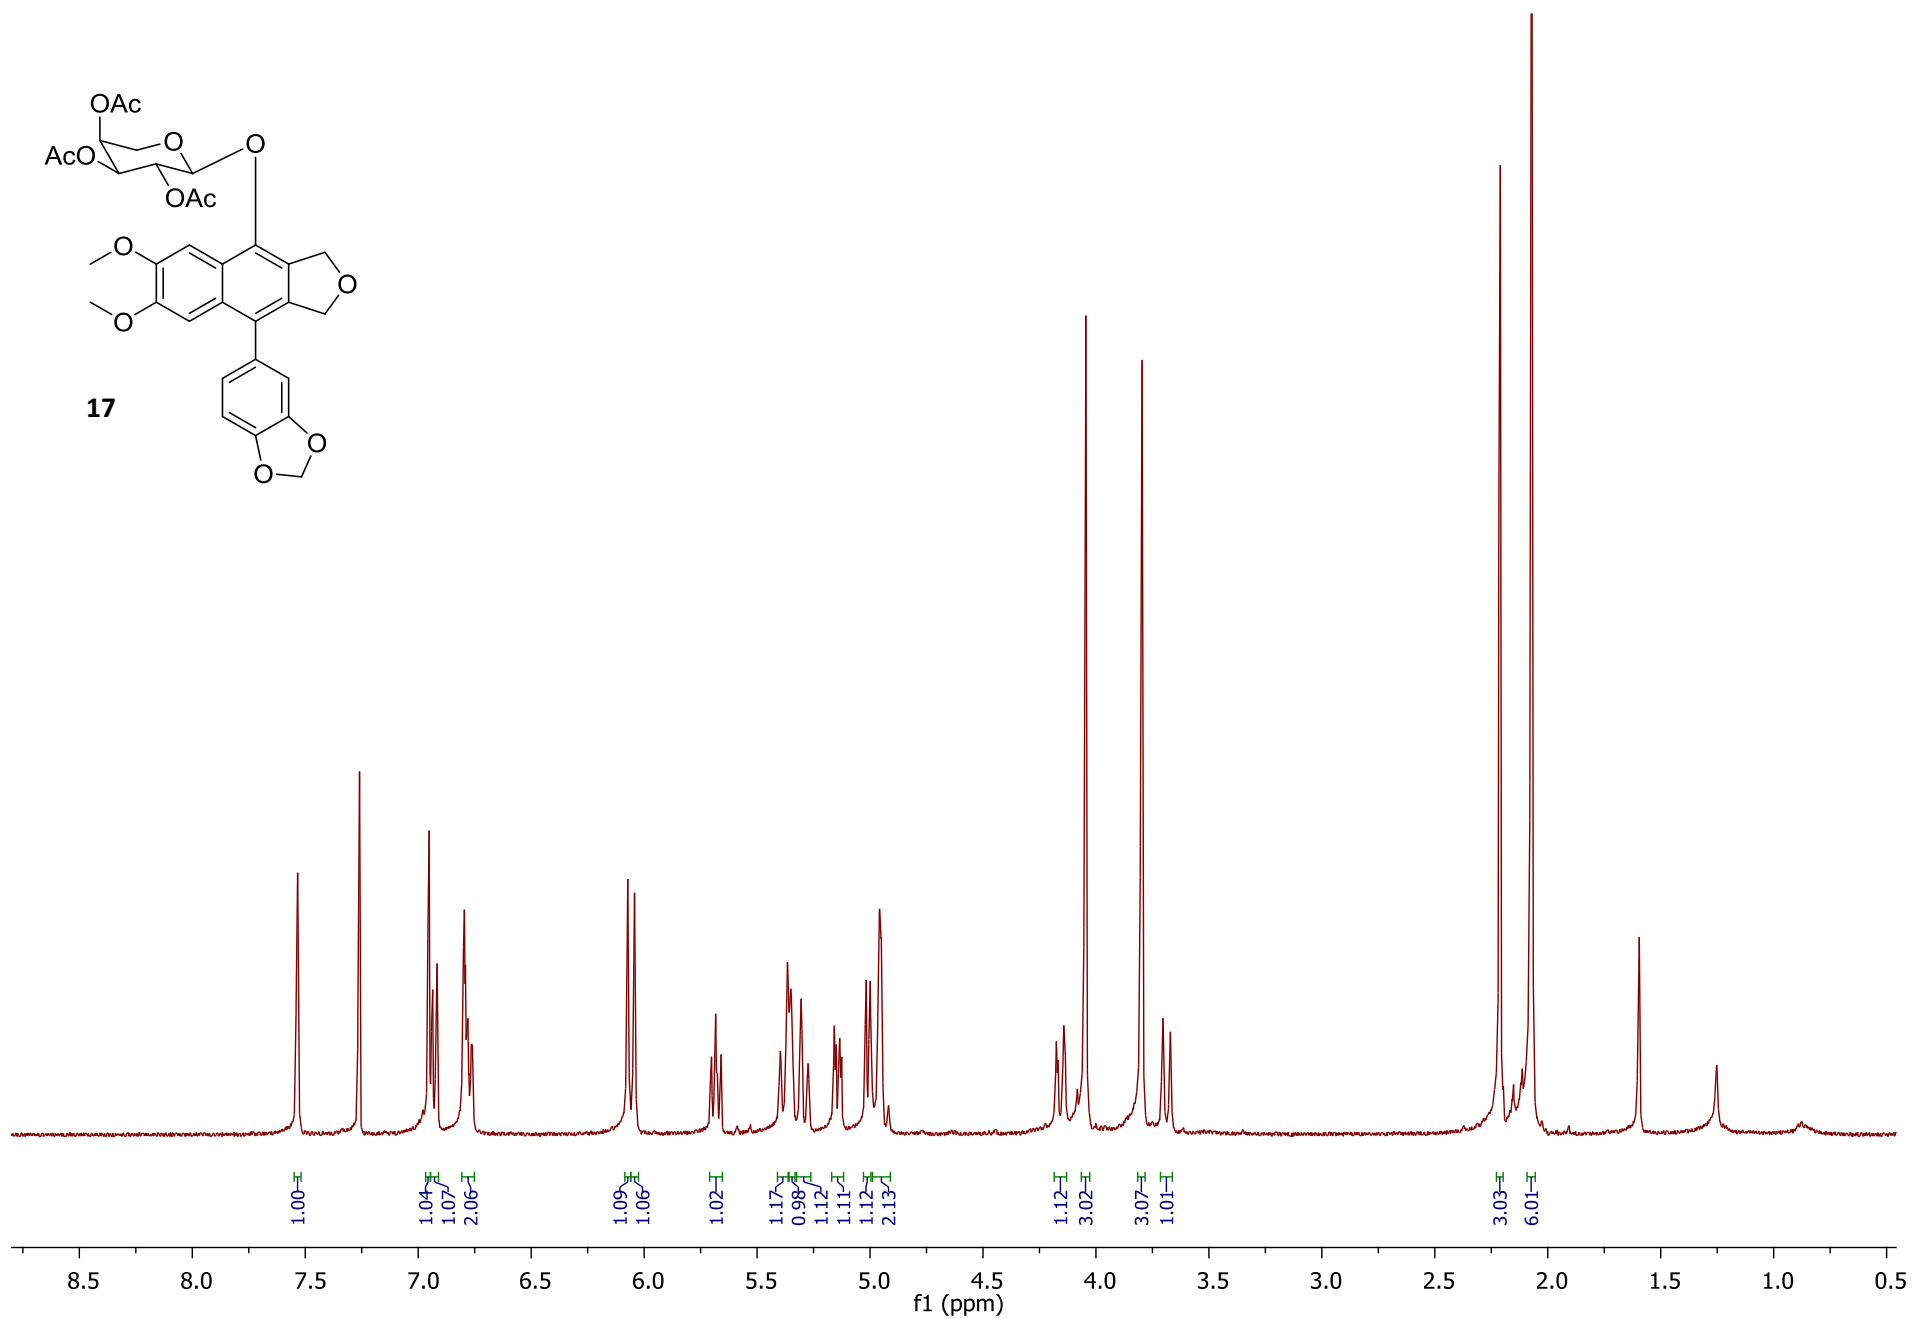

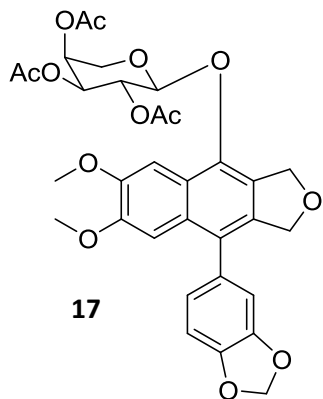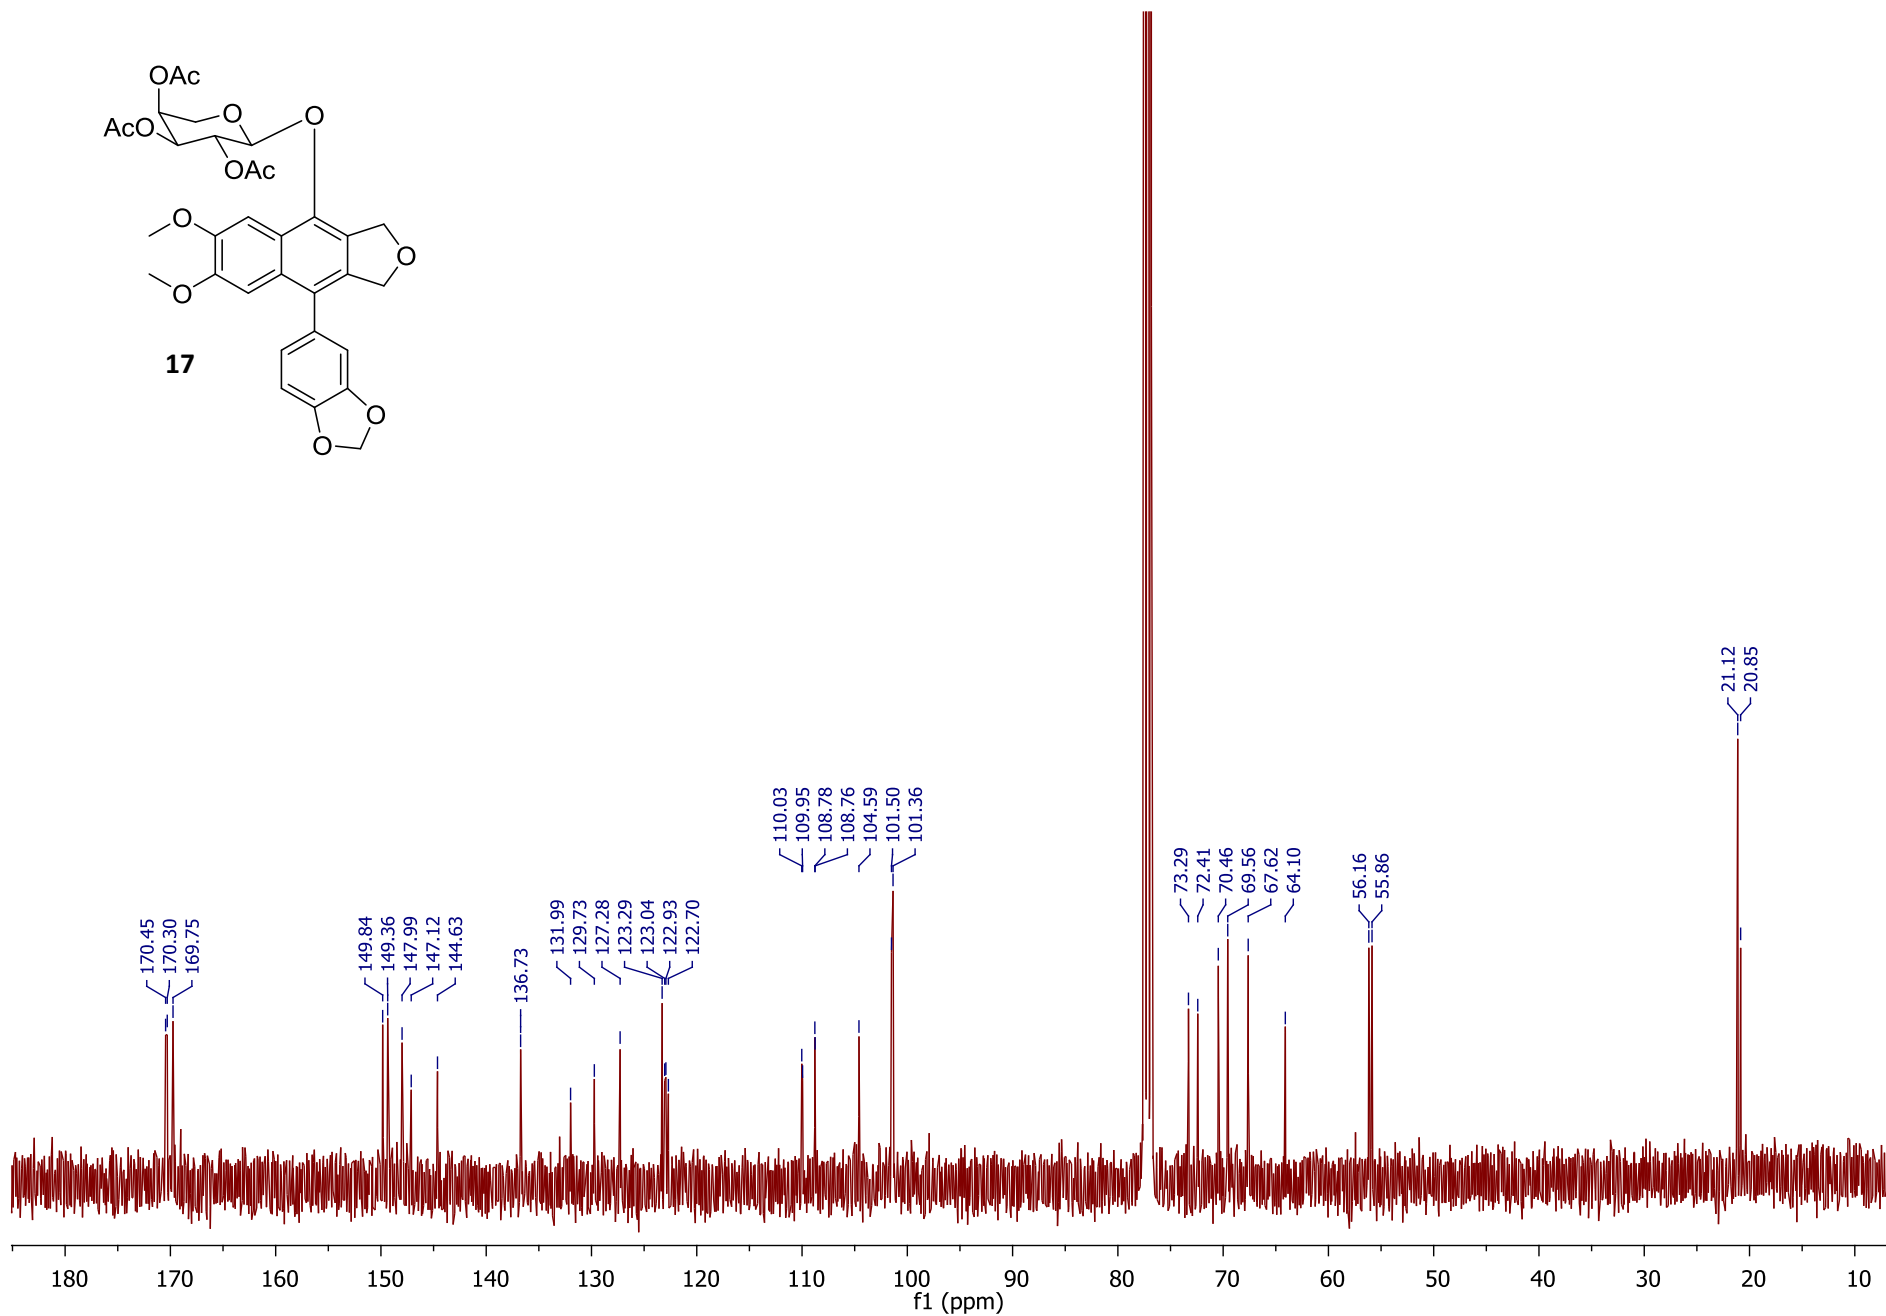



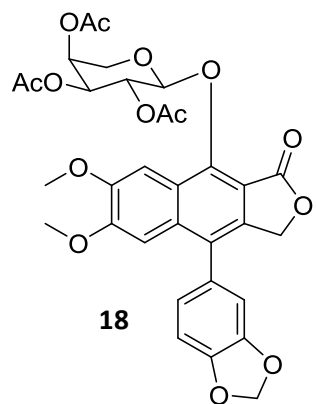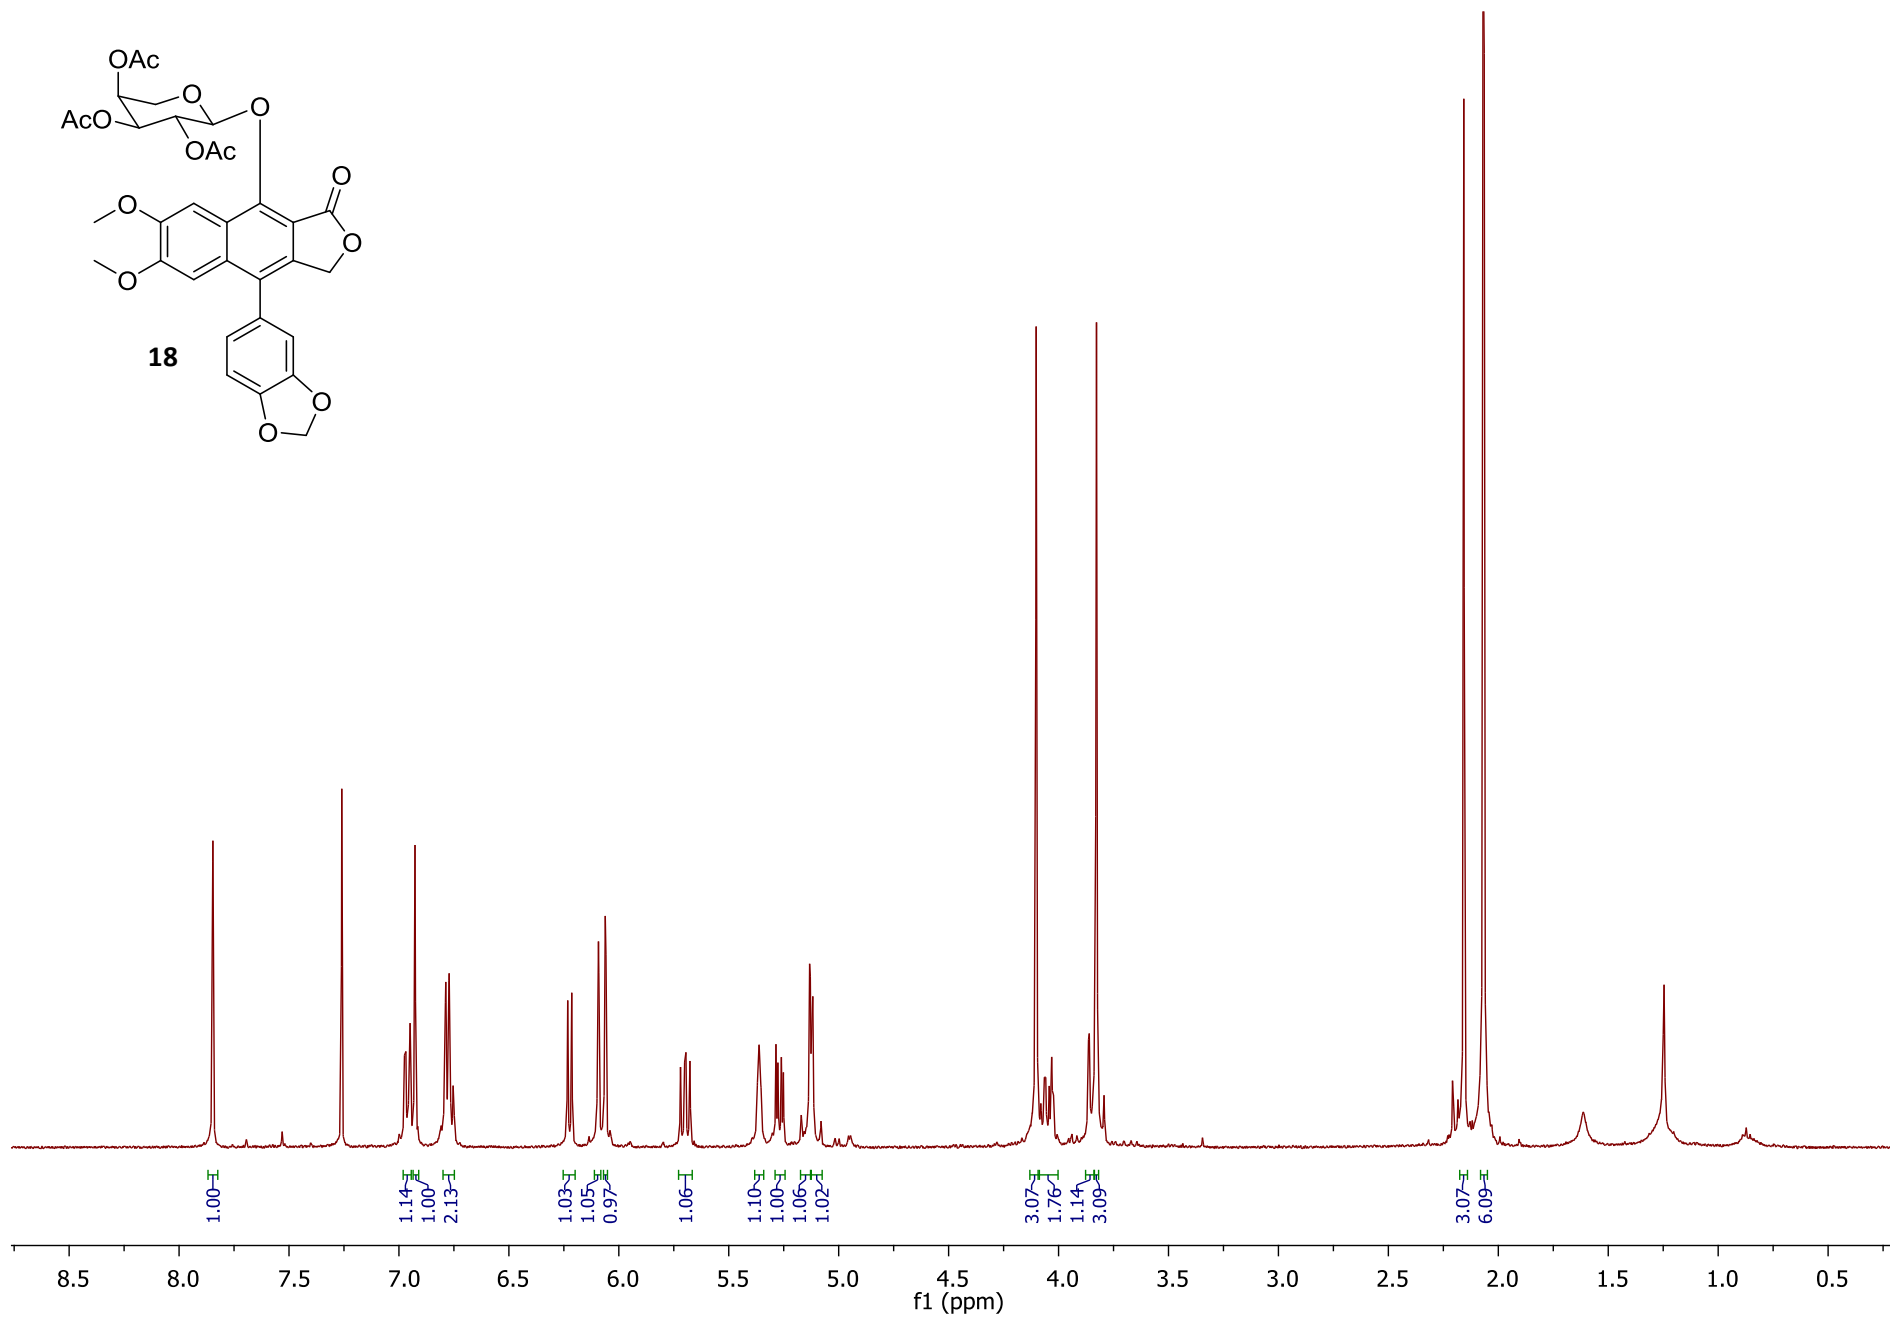



## **Additional NMR Spectra of 5 and 16**

**1D Selective Gradient NOESY, freq: 5.385 ppm (400 MHz, Acetone)**

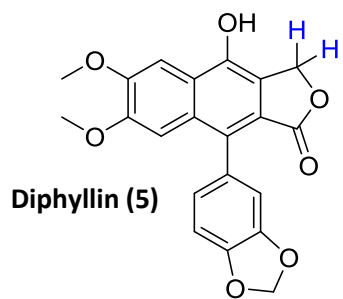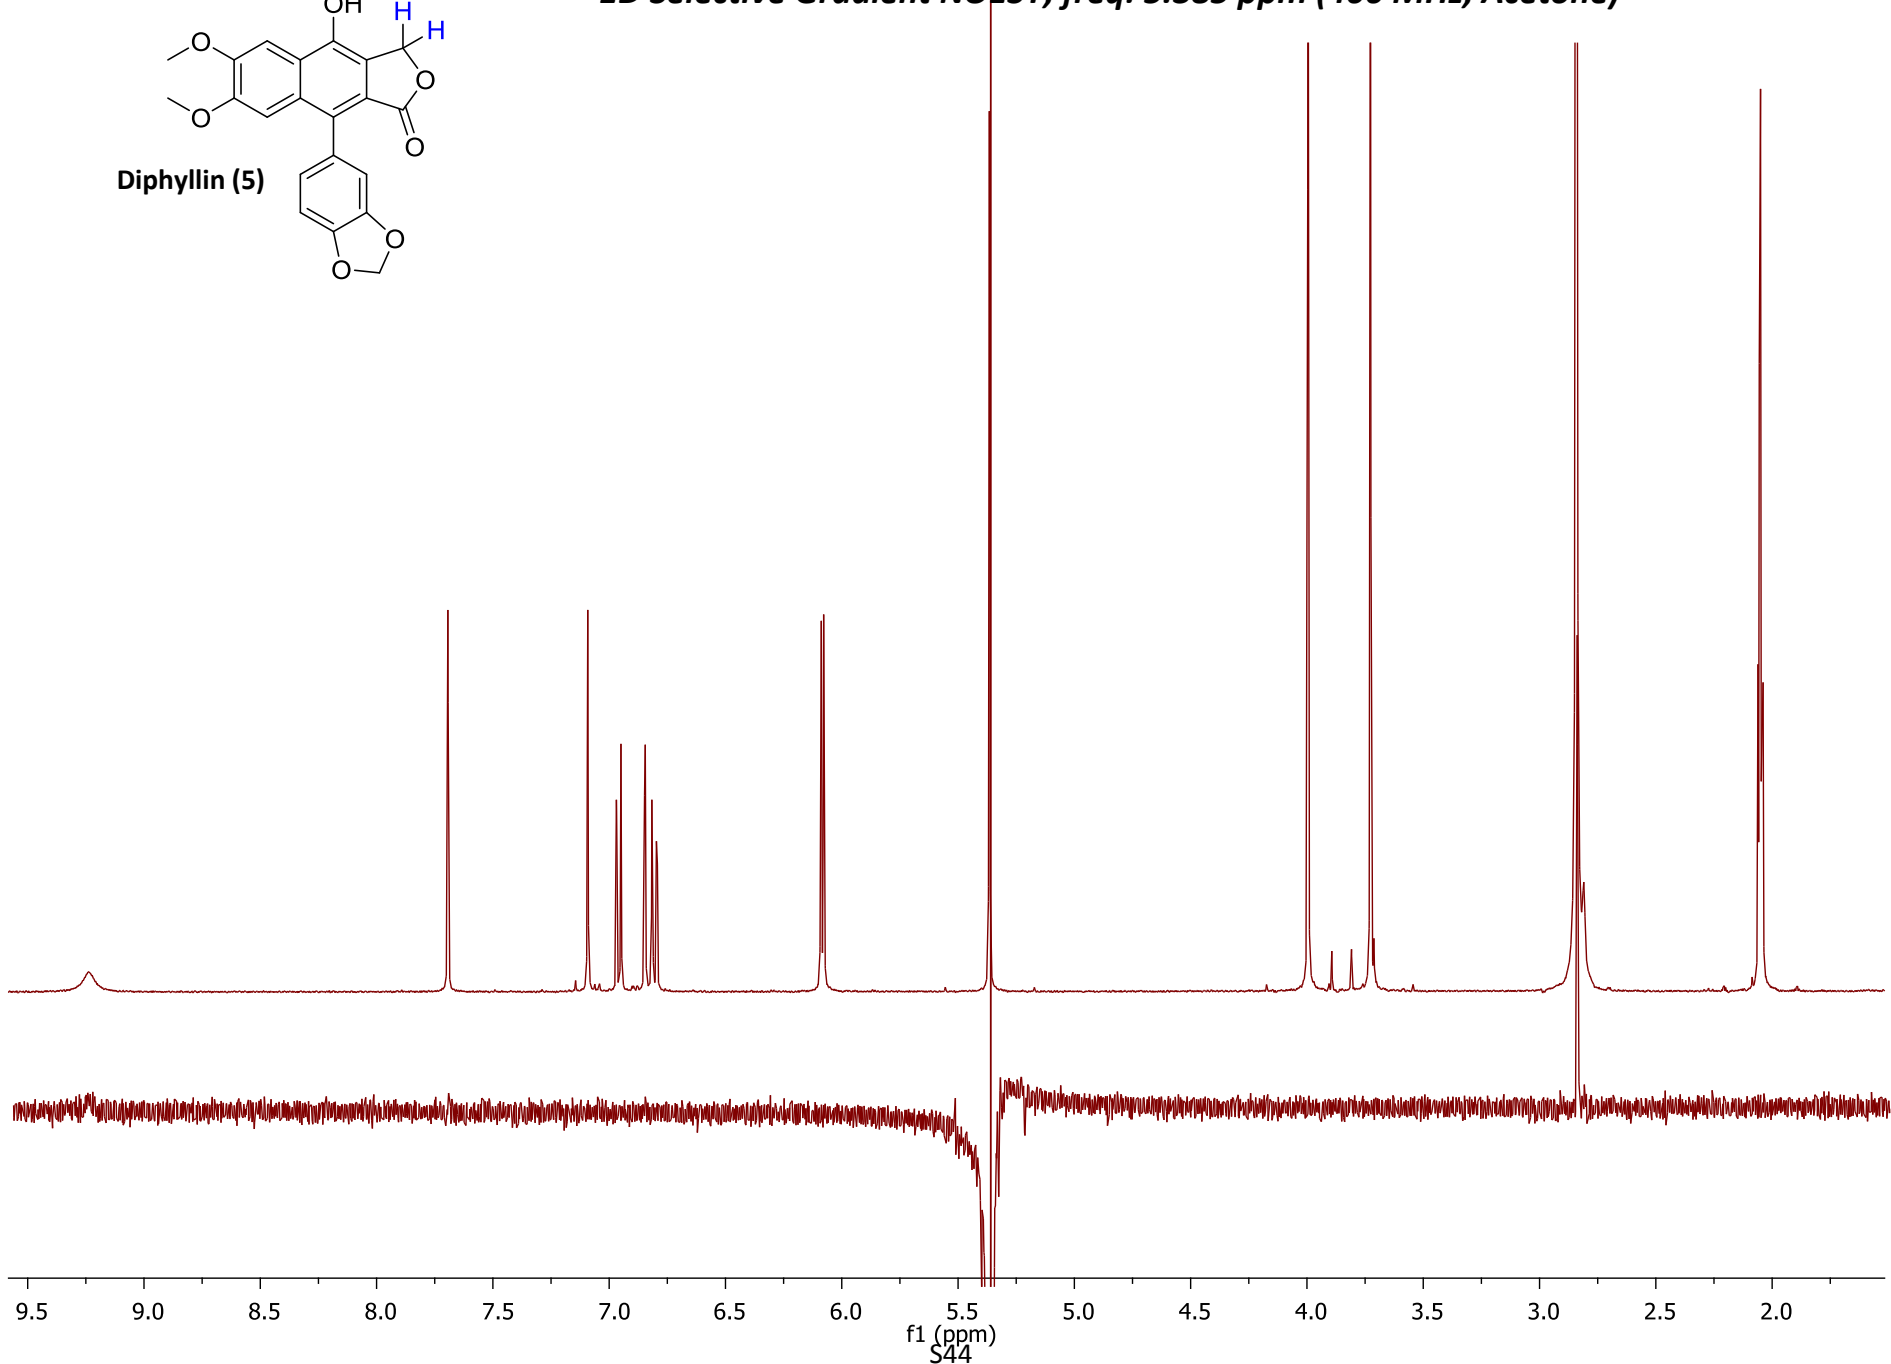

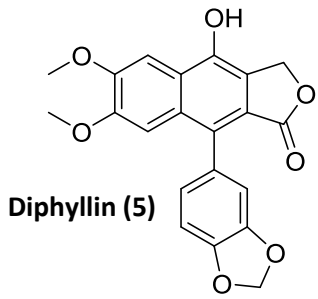

HSQC (400 MHz, Acetone)

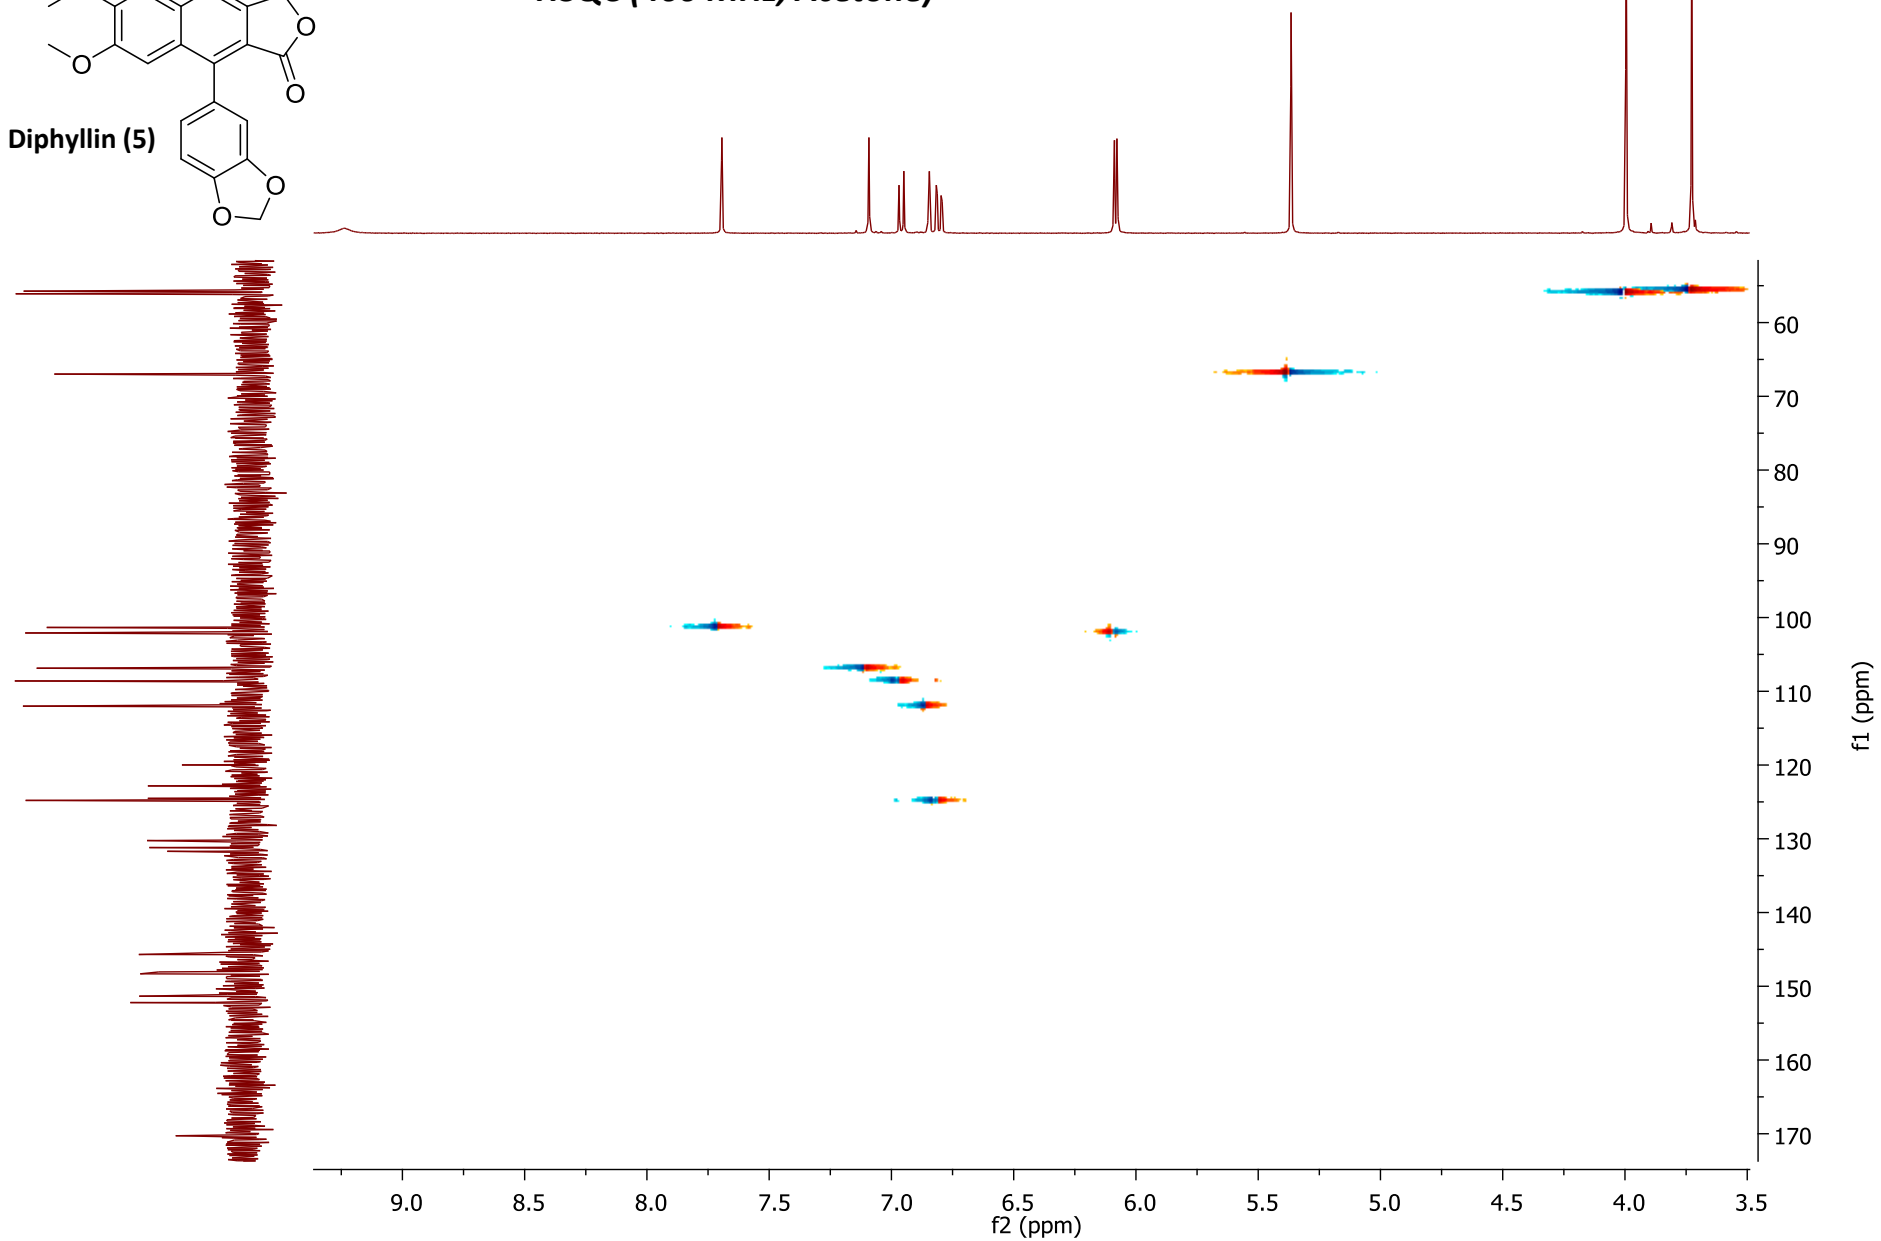

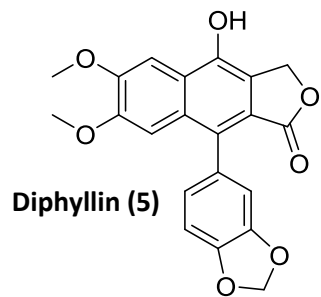

**HMBC (400 MHz, Acetone)**

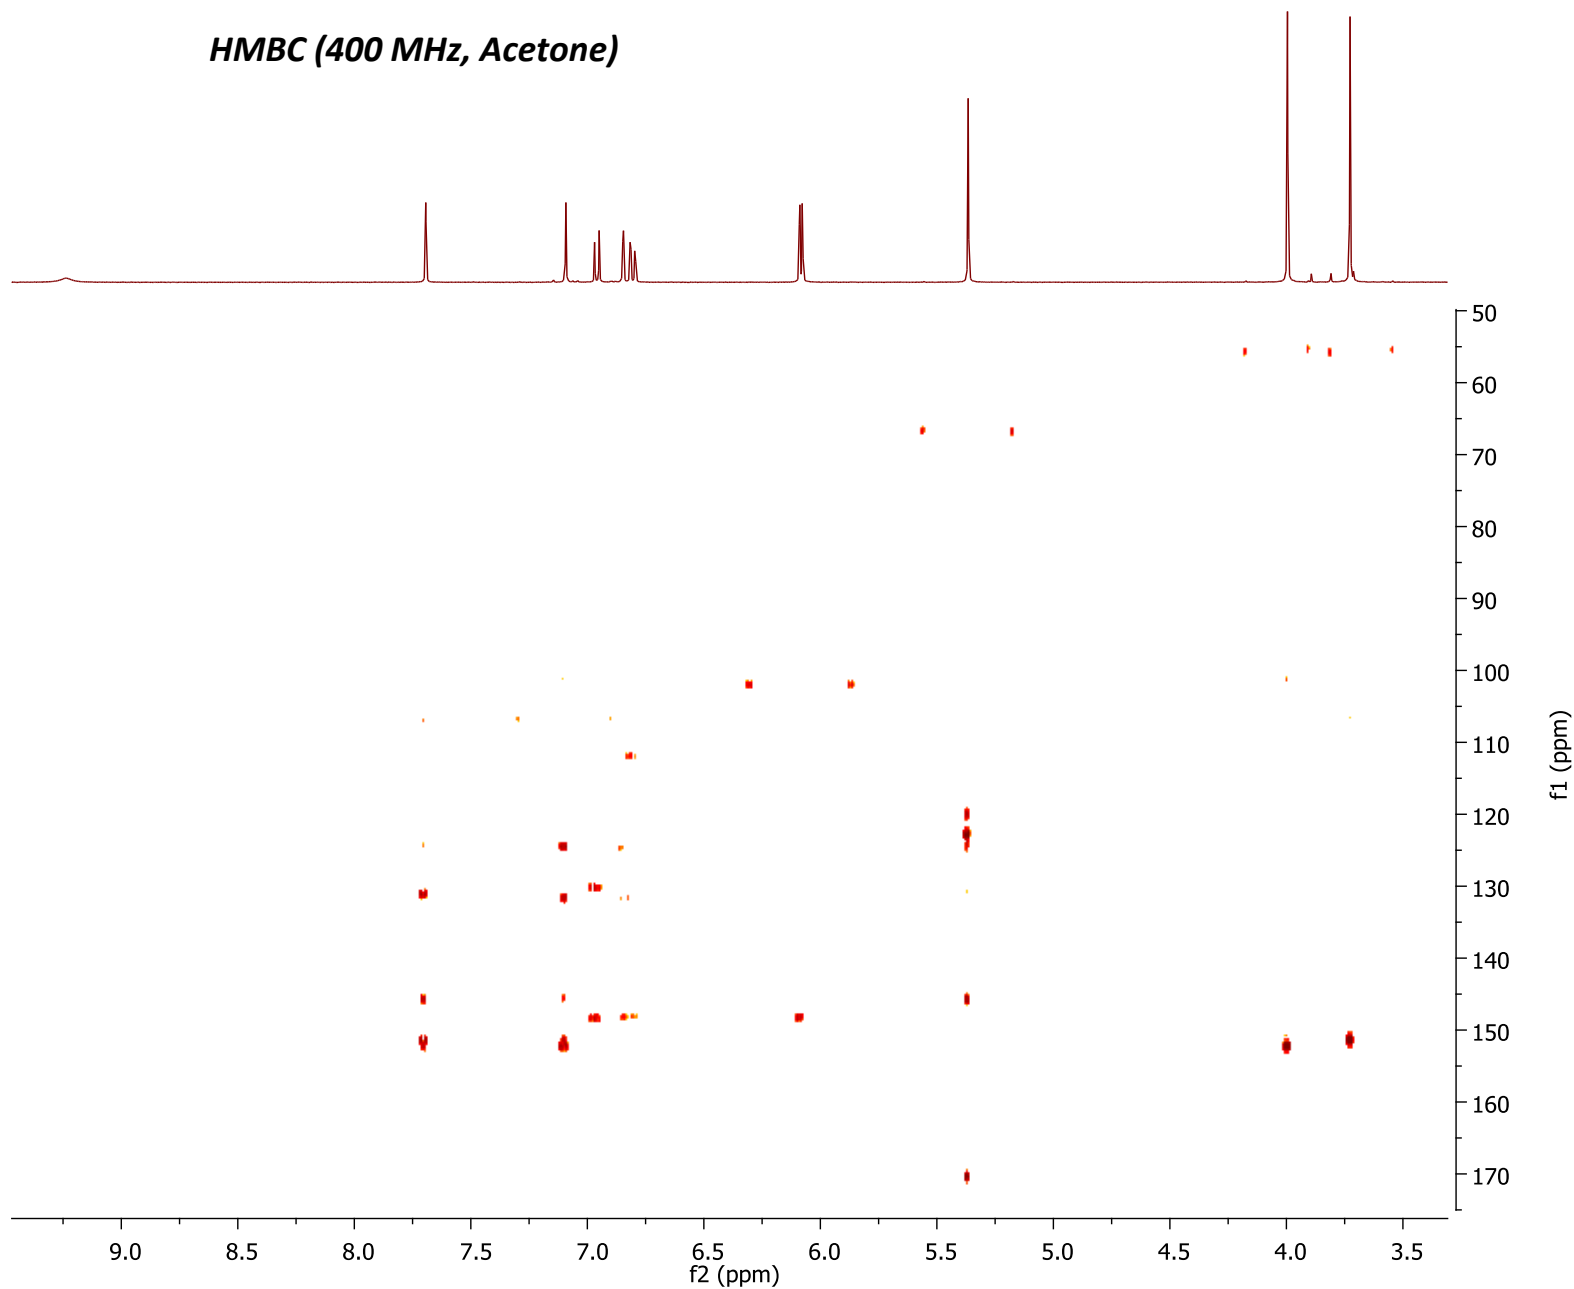

1D Selective Gradient NOESY, freq: 5.303 ppm (400 MHz, Acetone)

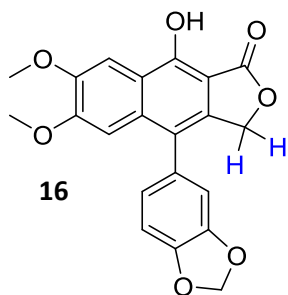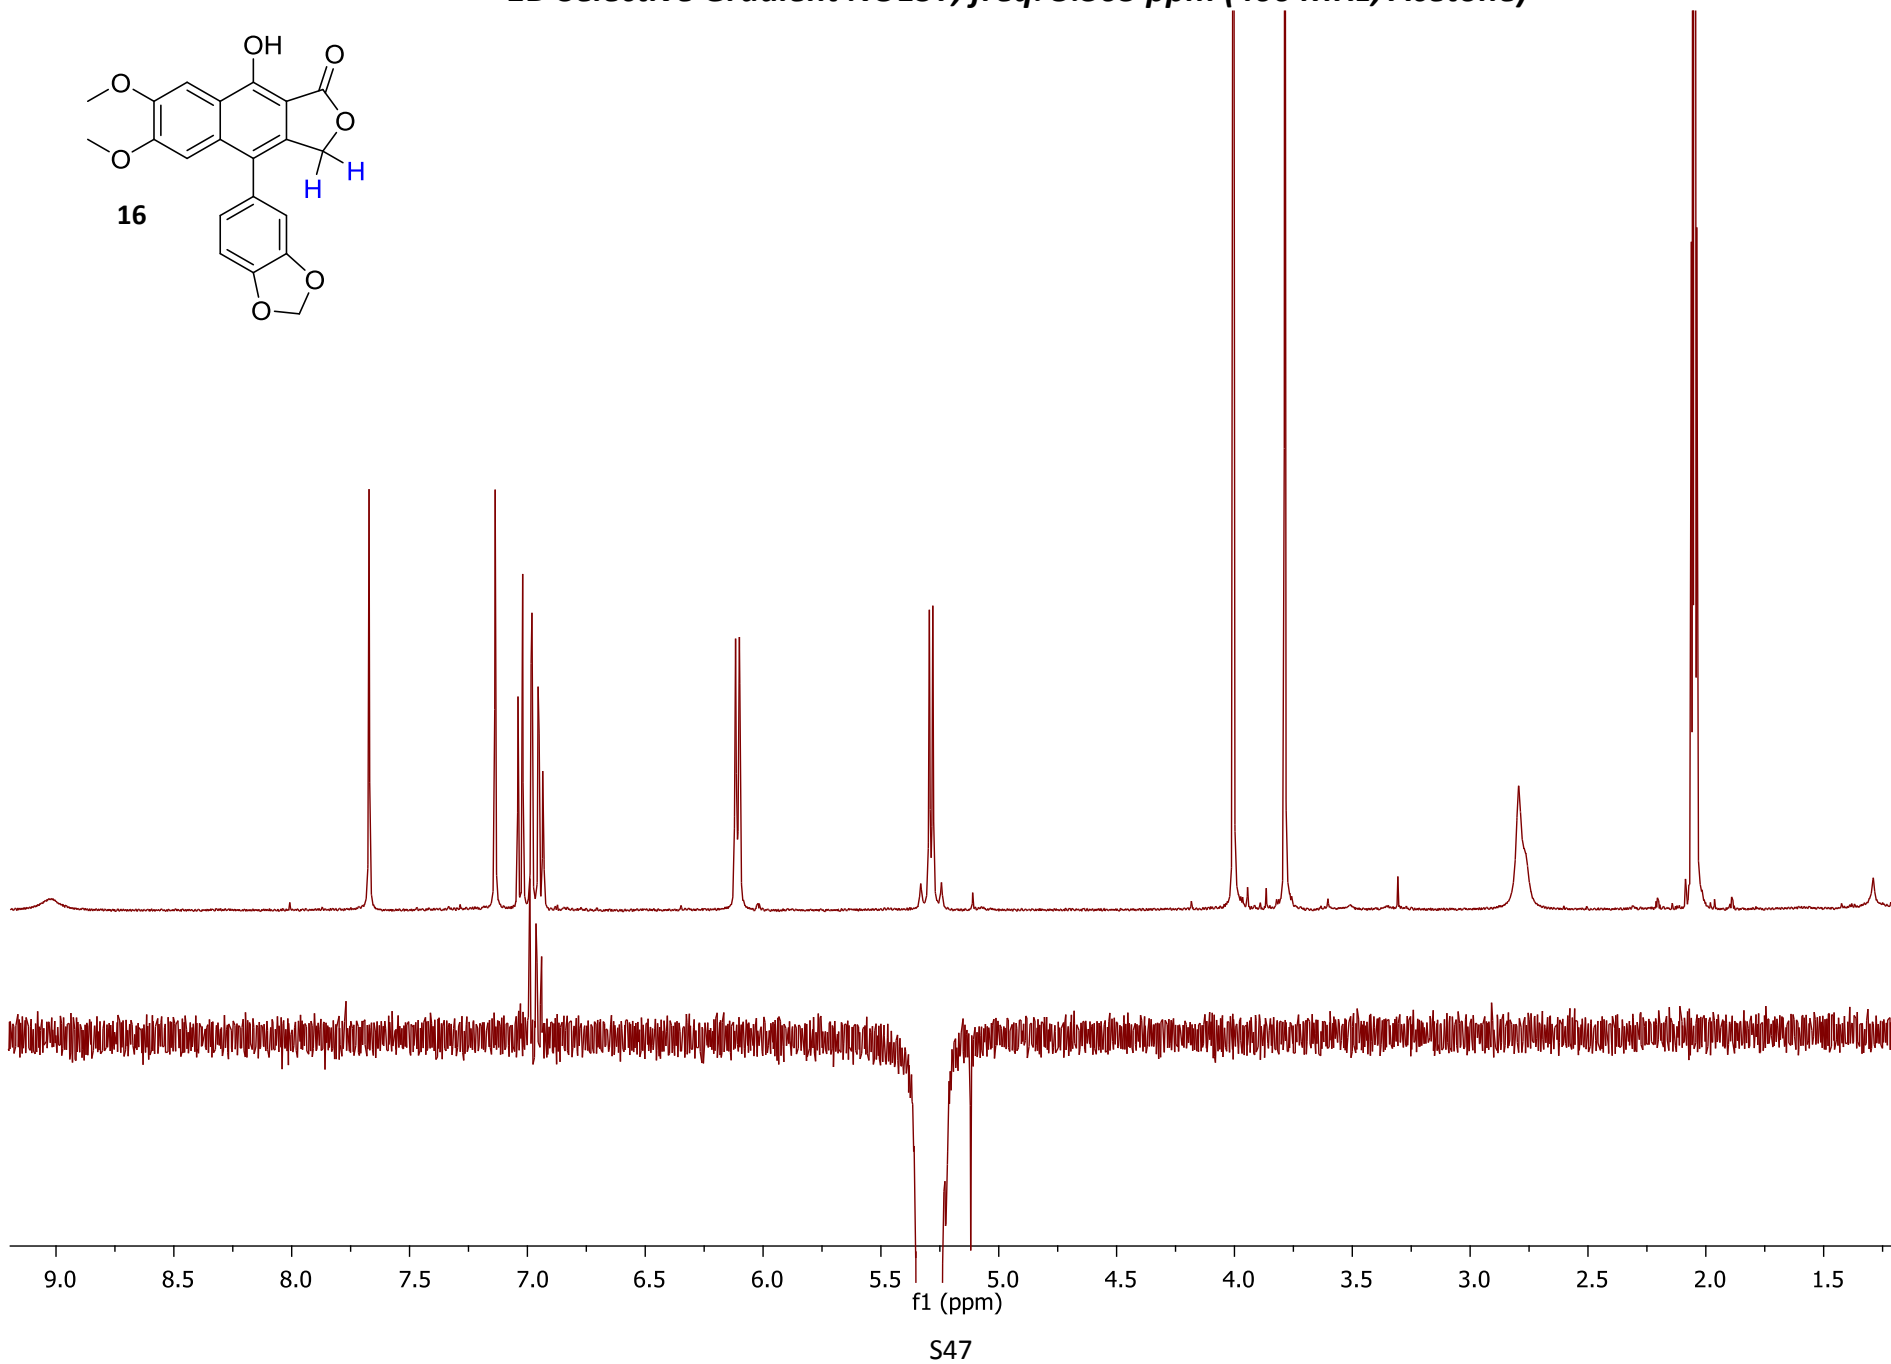

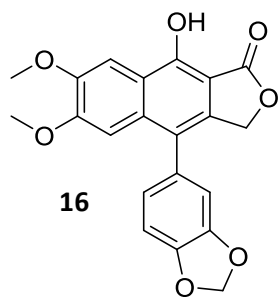

**COSY (400 MHz, Acetone)**

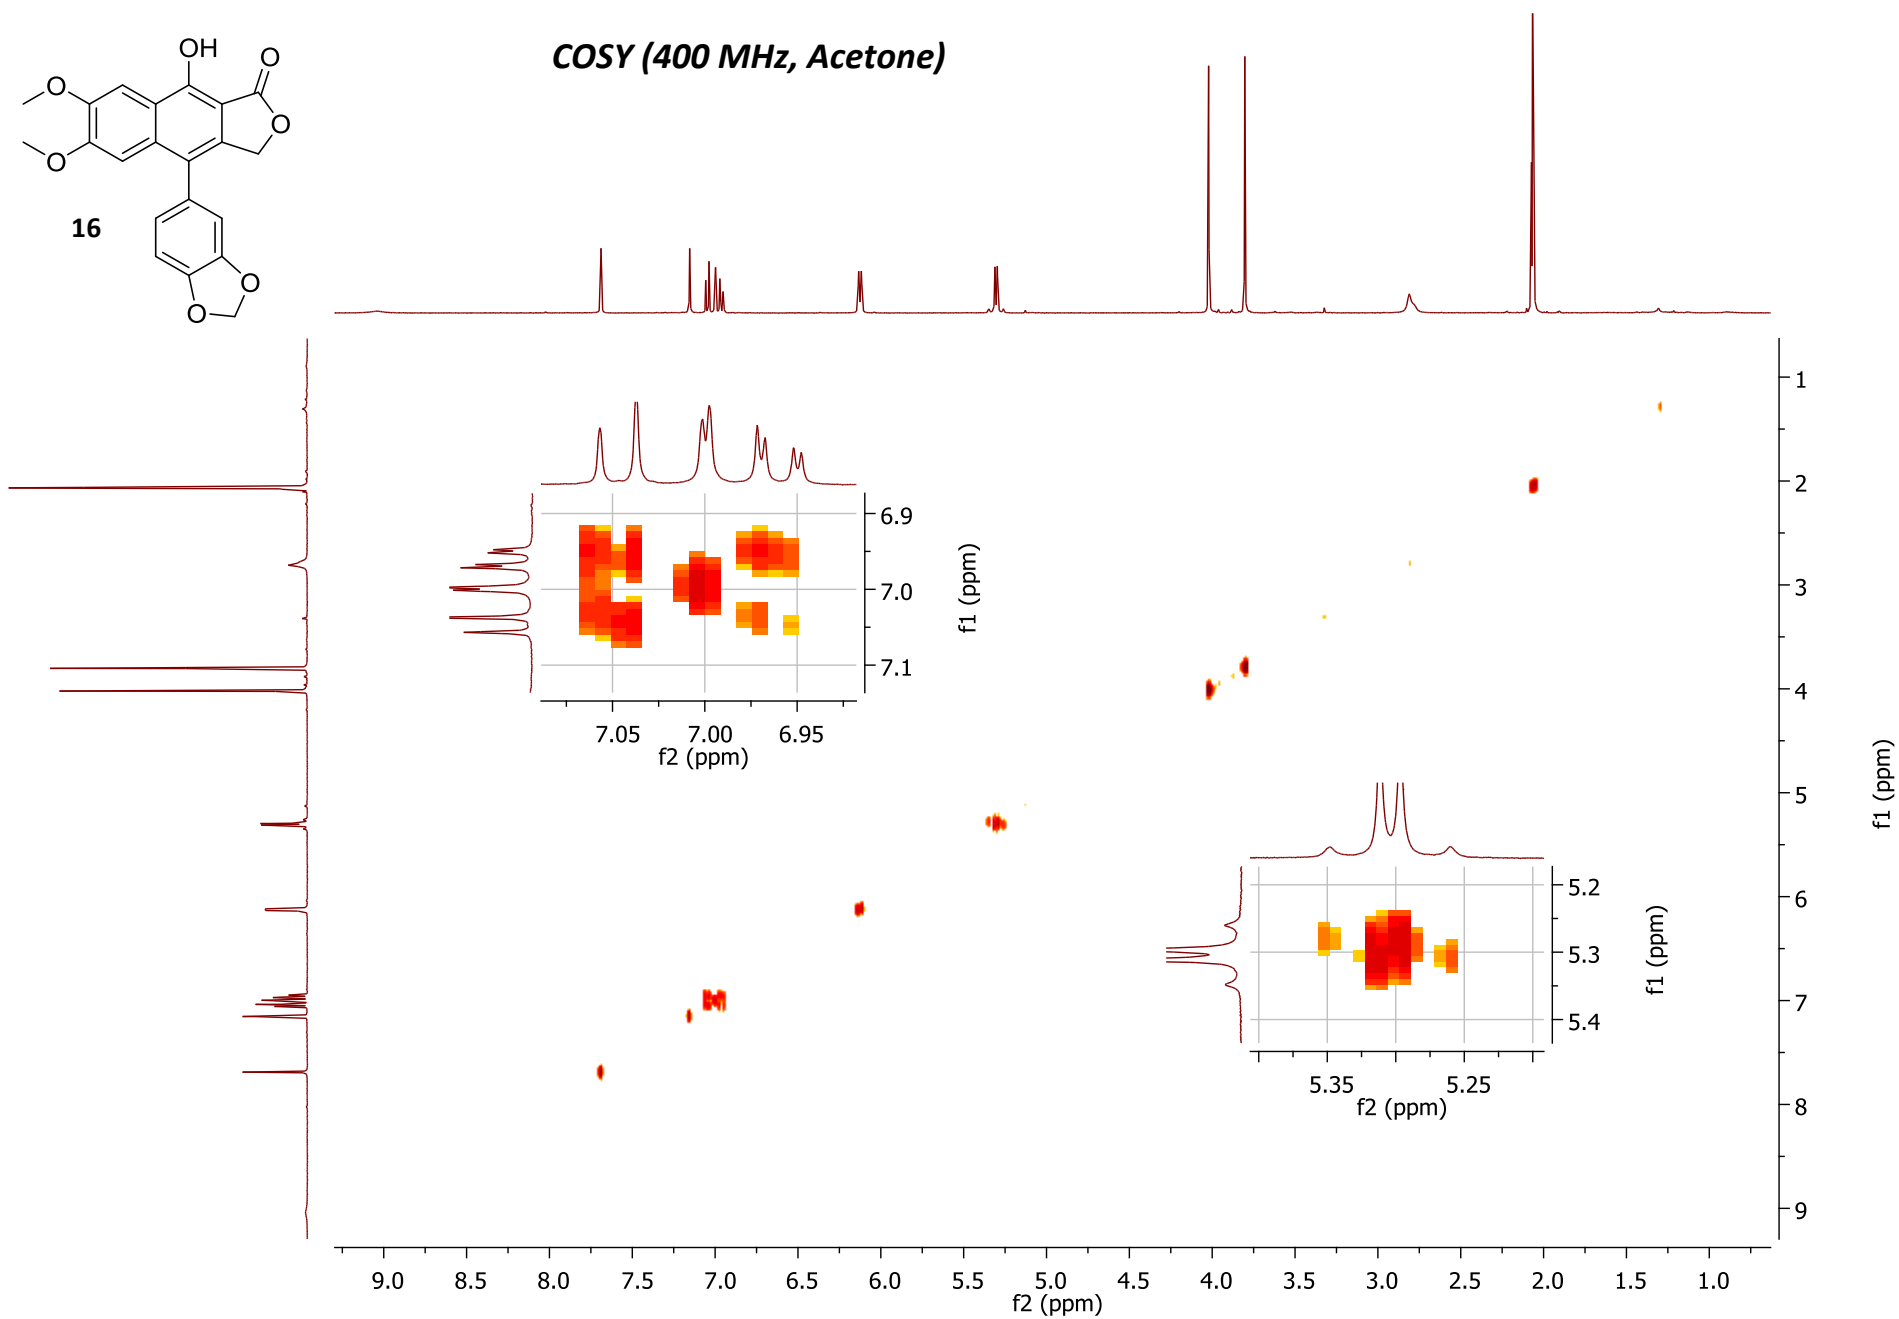



HSQC (400 MHz, Acetone)

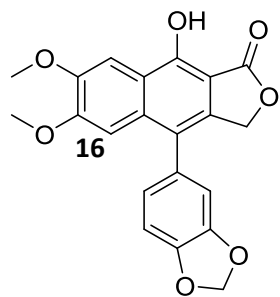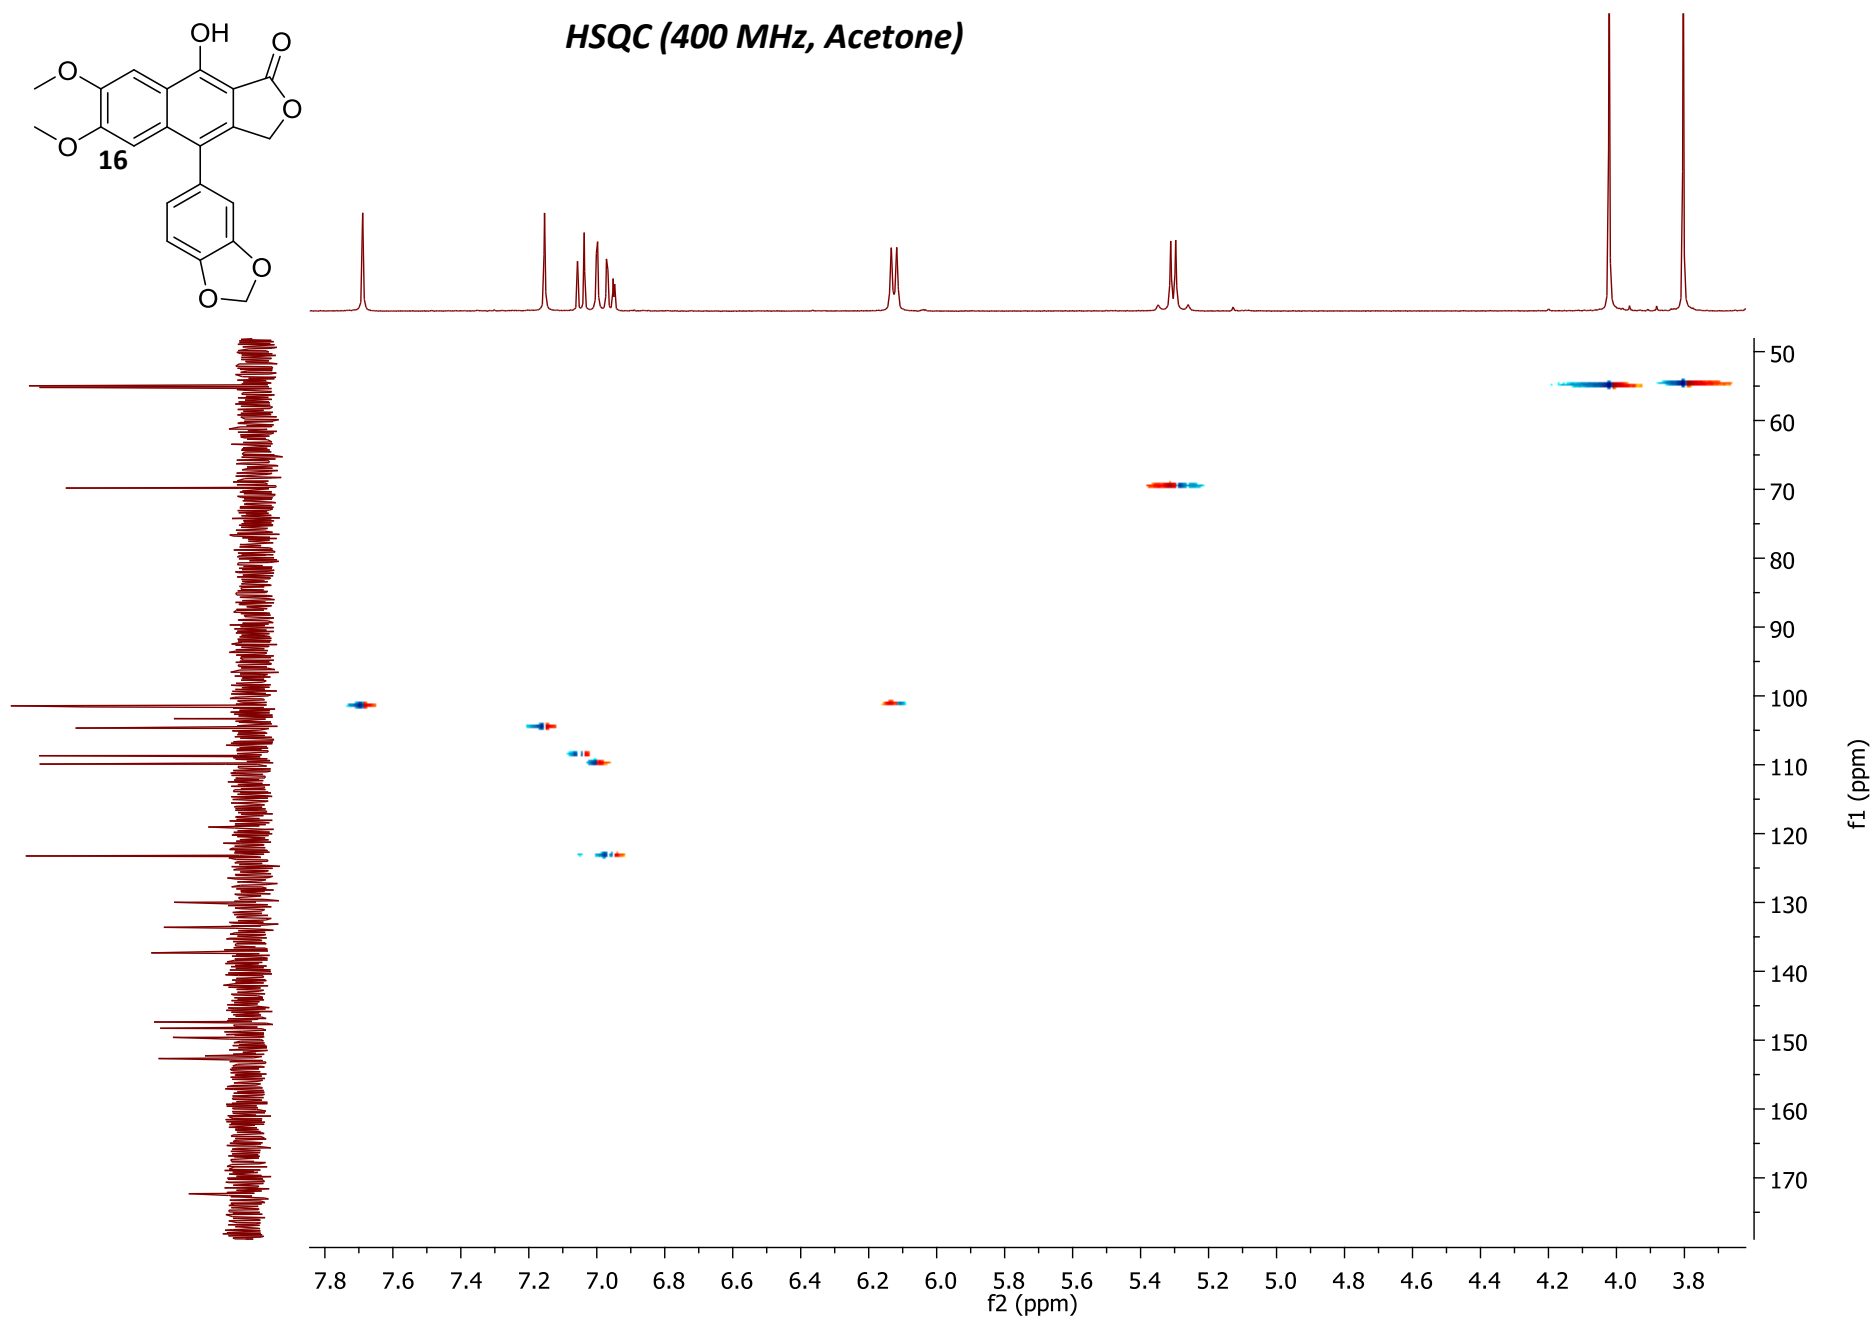

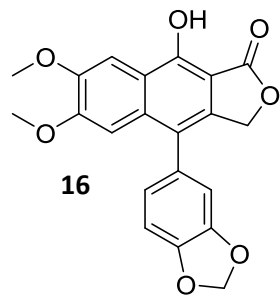

**HMBC (400 MHz, Acetone)**

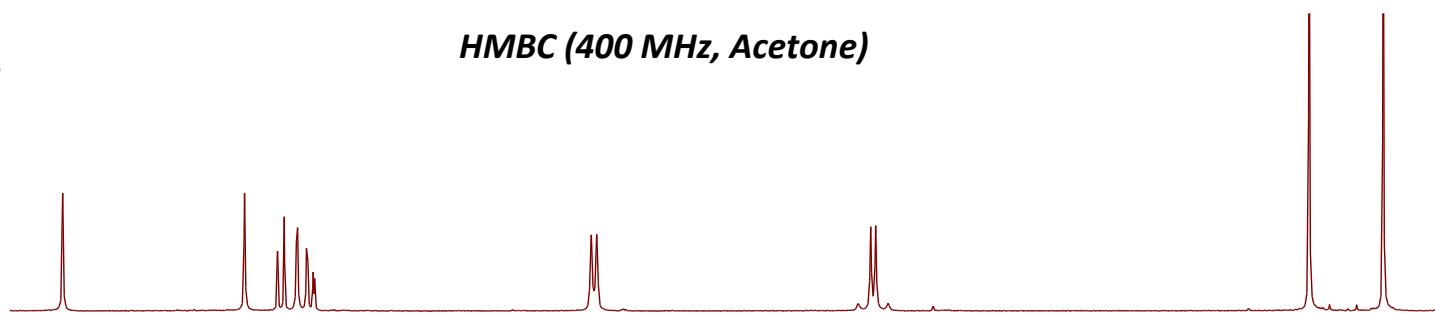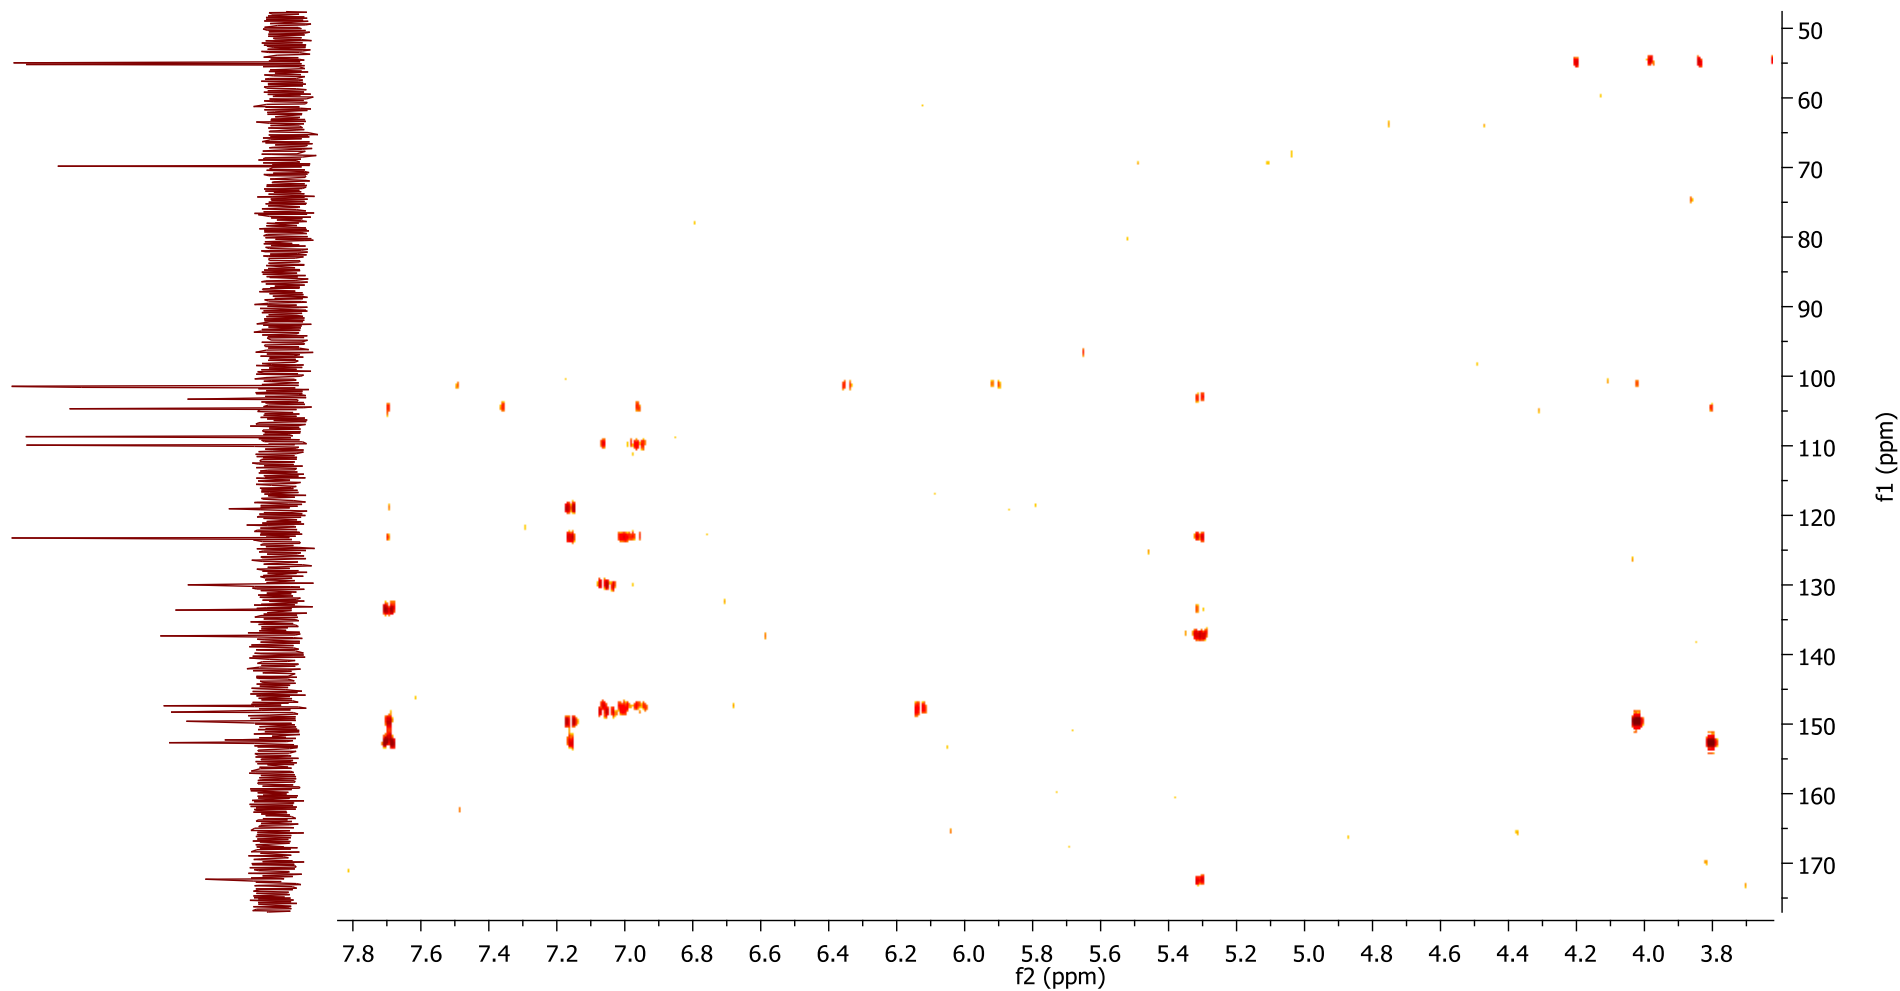

## **HPLC Traces for Tested Compounds**

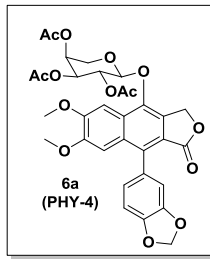

Method: % Methanol (w/ 0.1% formic acid) in Water (w/ 0.1% formic acid)

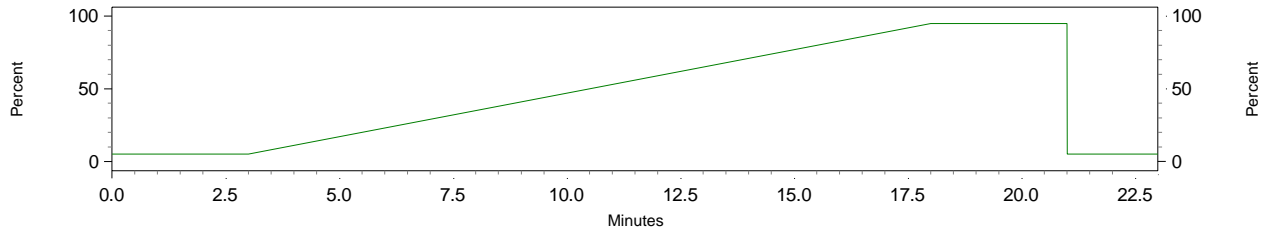

HPLC Trace (254 nm & 365 nm)

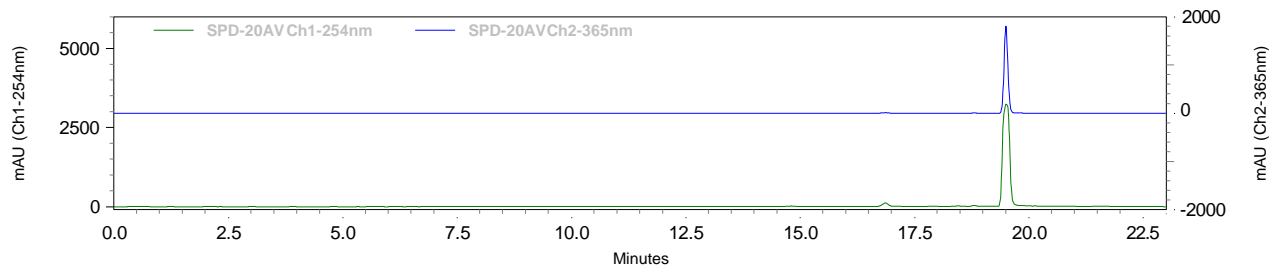

Zoomed View of Relevant Peaks

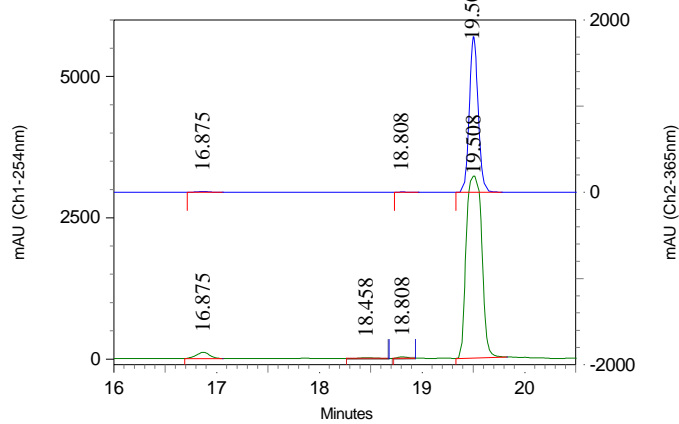

| Ch1-254nm      |               | Ch2-365nm      |               |
|----------------|---------------|----------------|---------------|
| Retention Time | Area %        | Retention Time | Area %        |
| 14.825         | 0.42          | 16.875         | 0.68          |
| 16.875         | 2.77          | 18.808         | 0.19          |
| 18.458         | 0.35          | 19.508         | 99.14         |
| 18.808         | 0.44          | <b>Total:</b>  | <b>100.00</b> |
| 19.508         | 96.02         |                |               |
| <b>Total:</b>  | <b>100.00</b> |                |               |

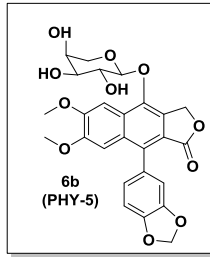

Method: % Methanol (w/ 0.1% formic acid) in Water (w/ 0.1% formic acid)

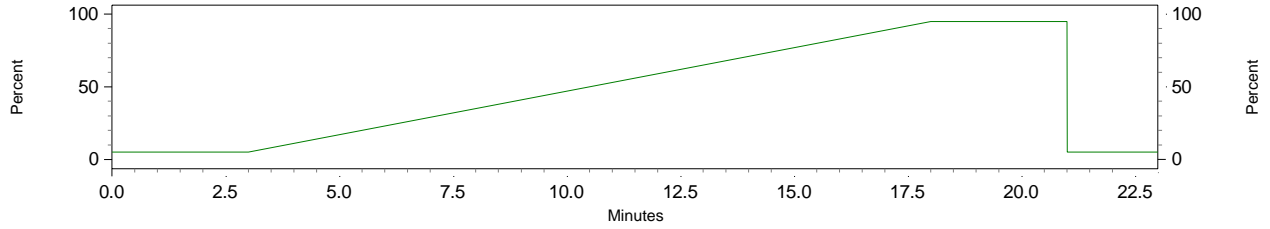

HPLC Trace (254 nm & 365 nm)

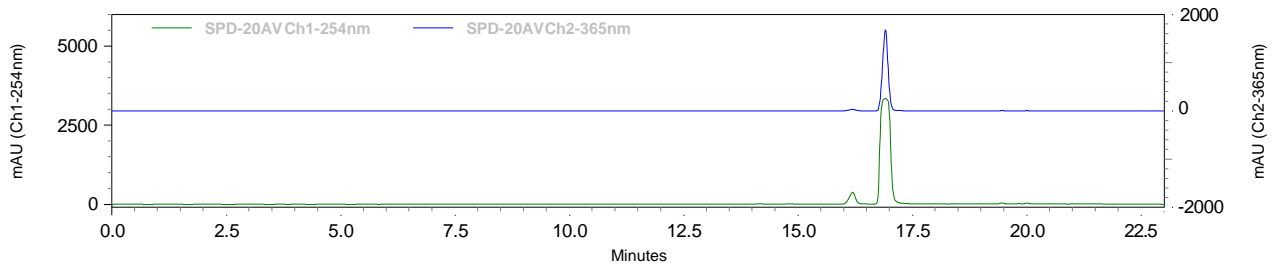

Zoomed View of Relevant Peaks

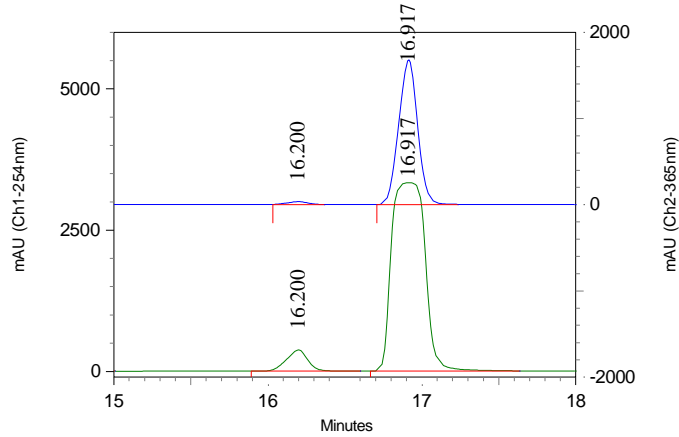

| Ch1-254nm      |               | Ch2-365nm      |               |
|----------------|---------------|----------------|---------------|
| Retention Time | Area %        | Retention Time | Area %        |
| 14.183         | 0.16          | 16.200         | 1.93          |
| 14.833         | 0.18          | 16.917         | 97.97         |
| 16.200         | 6.64          | 19.458         | 0.11          |
| 16.917         | 92.35         | <b>Total:</b>  | <b>100.00</b> |
| 19.458         | 0.38          |                |               |
| 20.008         | 0.28          |                |               |
| <b>Total:</b>  | <b>100.00</b> |                |               |

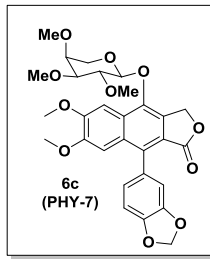

Method: % Methanol (w/ 0.1% formic acid) in Water (w/ 0.1% formic acid)

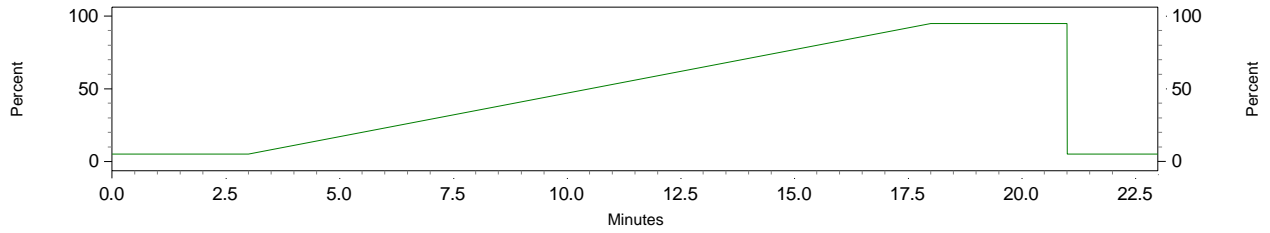

HPLC Trace (254 nm & 365 nm)

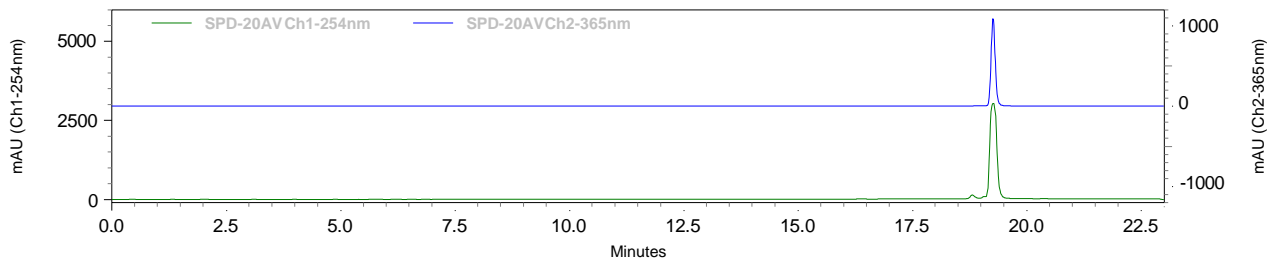

Zoomed View of Relevant Peaks

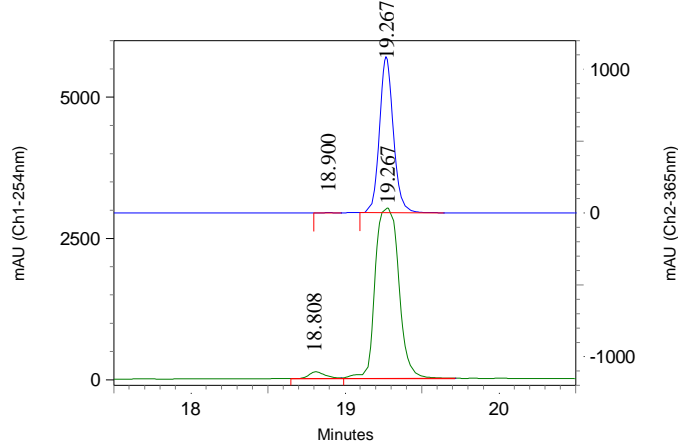

| <u>Ch1-254nm</u> |               | <u>Ch2-365nm</u> |               |
|------------------|---------------|------------------|---------------|
| Retention Time   | Area %        | Retention Time   | Area %        |
| 18.808           | 2.65          | 18.900           | 0.09          |
| 19.267           | 97.35         | 19.267           | 99.91         |
| <b>Total:</b>    | <b>100.00</b> | <b>Total:</b>    | <b>100.00</b> |

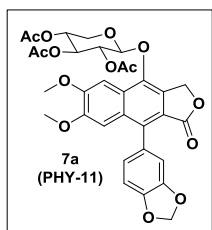

Method: % Methanol (w/ 0.1% formic acid) in Water (w/ 0.1% formic acid)

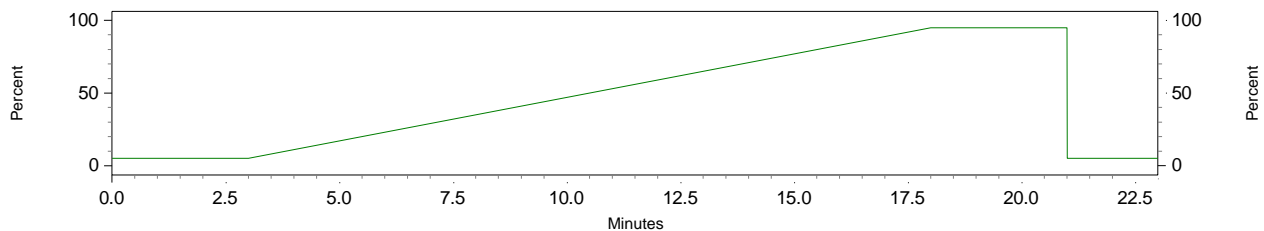

HPLC Trace (254 nm & 365 nm)

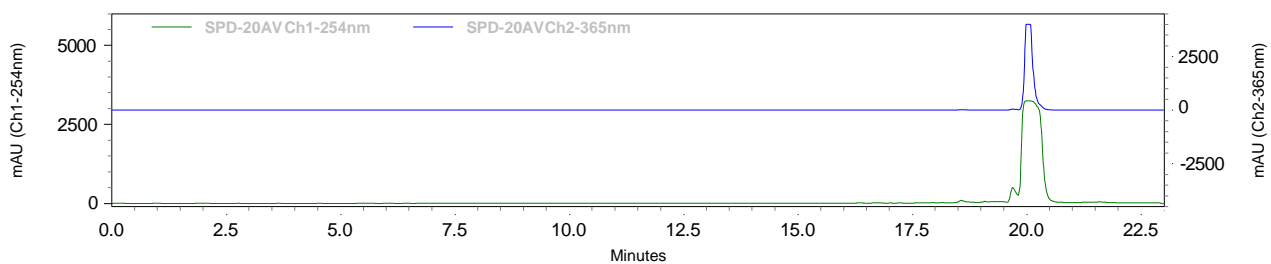

Zoomed View of Relevant Peaks

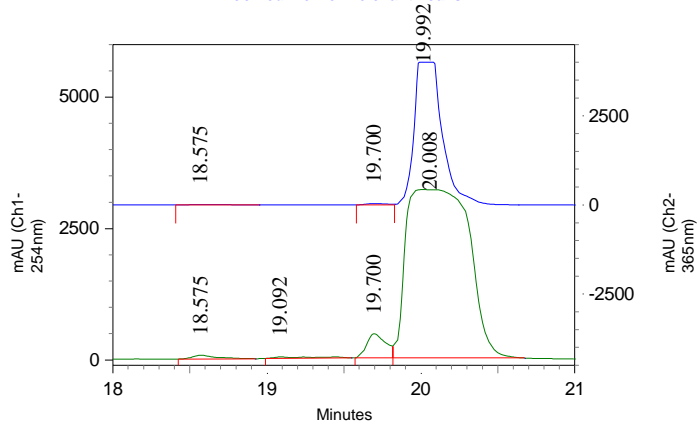

| <u>Ch1-254nm</u> |               | <u>Ch2-365nm</u> |               |
|------------------|---------------|------------------|---------------|
| Retention Time   | Area %        | Retention Time   | Area %        |
| 18.575           | 0.76          | 18.575           | 0.21          |
| 19.092           | 0.55          | 19.700           | 0.58          |
| 19.700           | 4.03          | 19.992           | 99.21         |
| 20.008           | 94.12         | <b>Total:</b>    | <b>100.00</b> |
| 21.592           | 0.54          |                  |               |
| <b>Total:</b>    | <b>100.00</b> |                  |               |

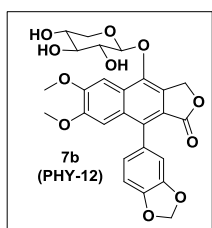

Method: % Methanol (w/ 0.1% formic acid) in Water (w/ 0.1% formic acid)

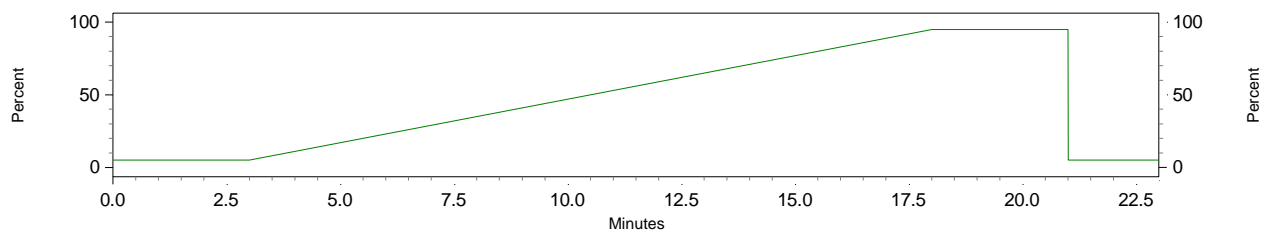

HPLC Trace (254 nm & 365 nm)

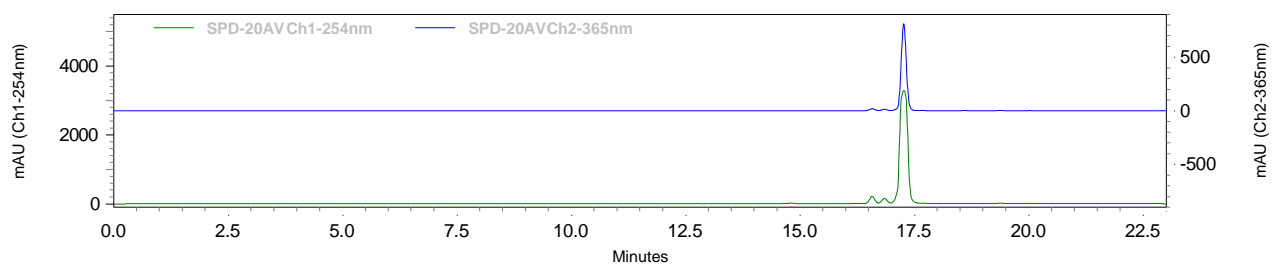

Zoomed View of Relevant Peaks

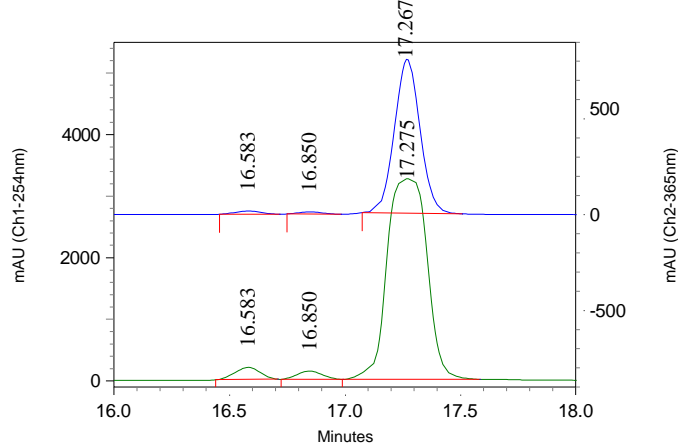

| <u>Ch1-254nm</u> |               | <u>Ch2-365nm</u> |               |
|------------------|---------------|------------------|---------------|
| Retention Time   | Area %        | Retention Time   | Area %        |
| 16.583           | 3.60          | 16.583           | 1.95          |
| 16.850           | 2.40          | 16.850           | 1.23          |
| 17.275           | 93.99         | 17.267           | 96.82         |
| <b>Total:</b>    | <b>100.00</b> | <b>Total:</b>    | <b>100.00</b> |



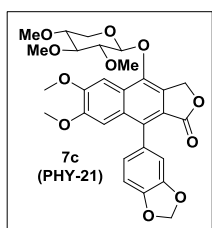

Method: % Methanol (w/ 0.1% formic acid) in Water (w/ 0.1% formic acid)

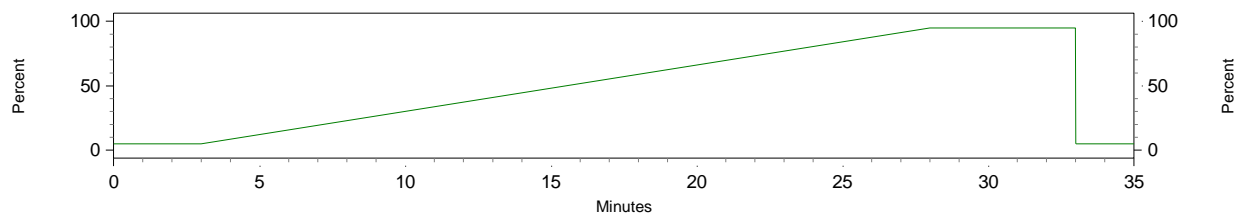

HPLC Trace (254 nm & 365 nm)

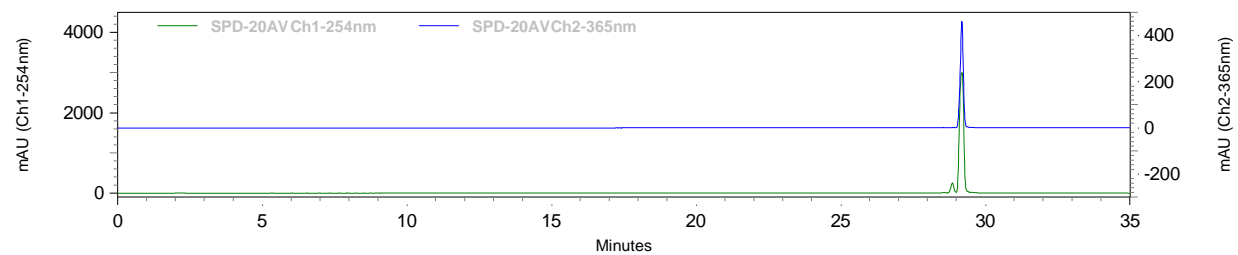

Zoomed View of Relevant Peaks

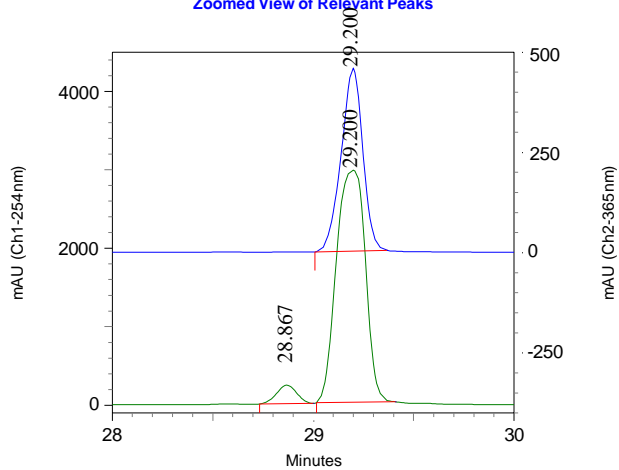

| Ch1-254nm      |               | Ch2-365nm      |               |
|----------------|---------------|----------------|---------------|
| Retention Time | Area %        | Retention Time | Area %        |
| 28.867         | 5.32          | 29.200         | 100.00        |
| 29.200         | 94.68         | <b>Total:</b>  | <b>100.00</b> |
| <b>Total:</b>  | <b>100.00</b> |                |               |

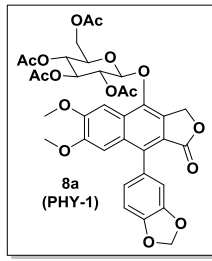

Method: % Methanol (w/ 0.1% formic acid) in Water (w/ 0.1% formic acid)

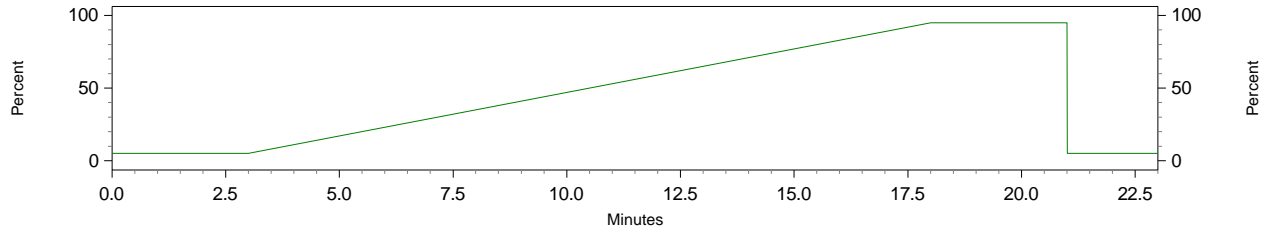

HPLC Trace (254 nm & 365 nm)

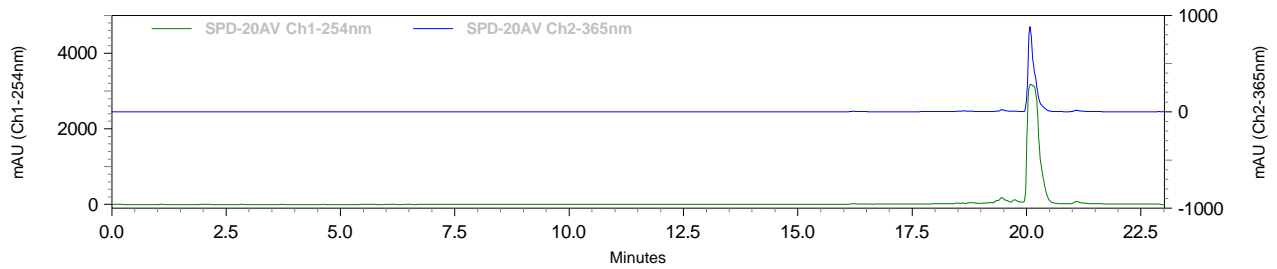

Zoomed View of Relevant Peaks

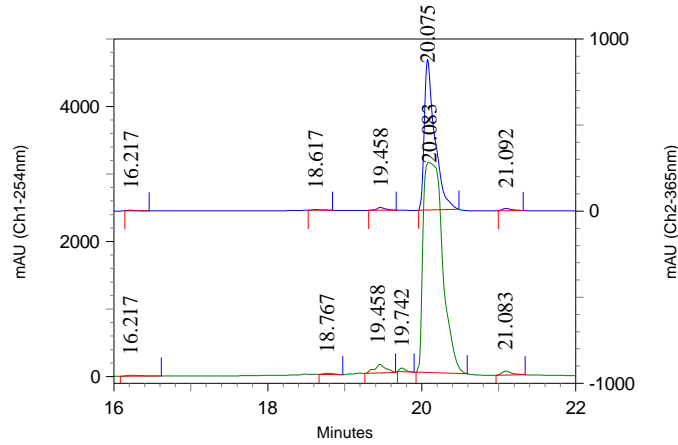

| Ch1-254nm      |               | Ch2-365nm      |               |
|----------------|---------------|----------------|---------------|
| Retention Time | Area %        | Retention Time | Area %        |
| 16.217         | 0.28          | 16.217         | 0.28          |
| 18.767         | 0.32          | 18.617         | 0.51          |
| 19.458         | 2.31          | 19.458         | 1.55          |
| 19.742         | 0.49          | 20.075         | 96.38         |
| 20.083         | 95.66         | 21.092         | 1.28          |
| 21.083         | 0.93          | <b>Total:</b>  | <b>100.00</b> |
| <b>Total:</b>  | <b>100.00</b> |                |               |

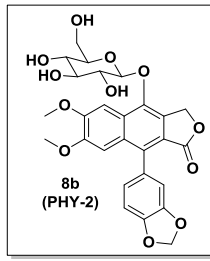

Method: % Methanol (w/ 0.1% formic acid) in Water (w/ 0.1% formic acid)



HPLC Trace (254 nm & 365 nm)

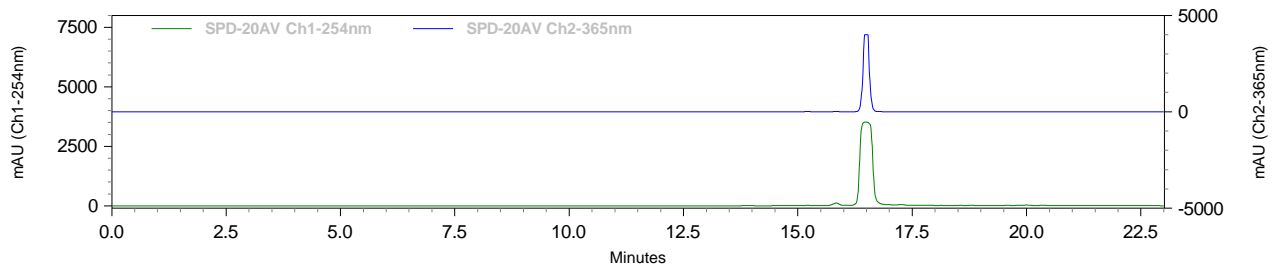

Zoomed View of Relevant Peaks

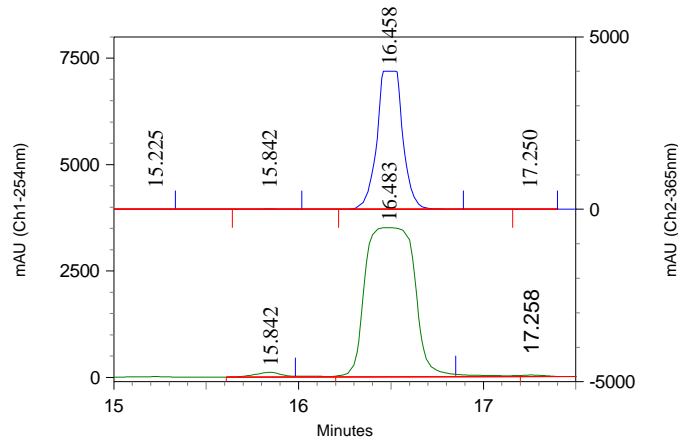

| <u>Ch1-254nm</u> |               | <u>Ch2-365nm</u> |               |
|------------------|---------------|------------------|---------------|
| Retention Time   | Area %        | Retention Time   | Area %        |
| 15.842           | 1.64          | 15.225           | 0.23          |
| 16.483           | 97.92         | 15.842           | 0.22          |
| 17.258           | 0.43          | 16.458           | 99.48         |
| <b>Total:</b>    | <b>100.00</b> | 17.250           | 0.07          |
|                  |               | <b>Total:</b>    | <b>100.00</b> |

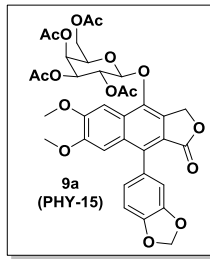

Method: % Methanol (w/ 0.1% formic acid) in Water (w/ 0.1% formic acid)



HPLC Trace (254 nm & 365 nm)

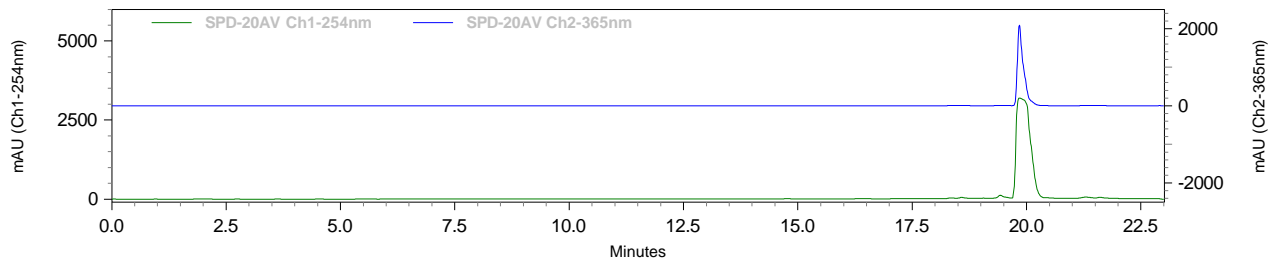

Zoomed View of Relevant Peaks

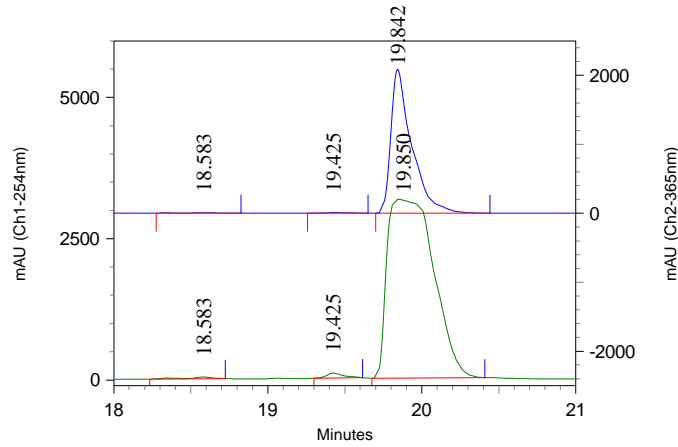

| <u>Ch1-254nm</u> |               | <u>Ch2-365nm</u> |               |
|------------------|---------------|------------------|---------------|
| Retention Time   | Area %        | Retention Time   | Area %        |
| 18.583           | 0.53          | 18.583           | 0.28          |
| 19.425           | 0.94          | 19.425           | 0.32          |
| 19.850           | 97.30         | 19.842           | 99.06         |
| 21.300           | 1.23          | 21.300           | 0.34          |
| <b>Total:</b>    | <b>100.00</b> | <b>Total:</b>    | <b>100.00</b> |

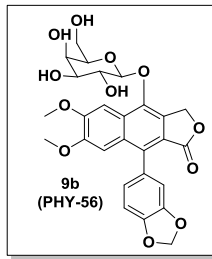

Method: % Methanol (w/ 0.1% formic acid) in Water (w/ 0.1% formic acid)

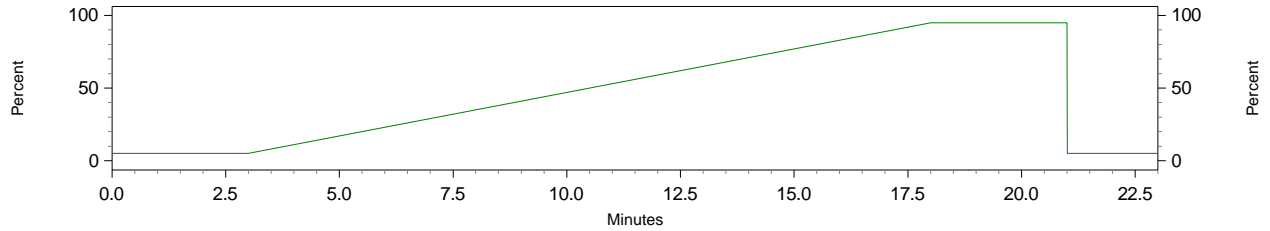

HPLC Trace (254 nm & 365 nm)

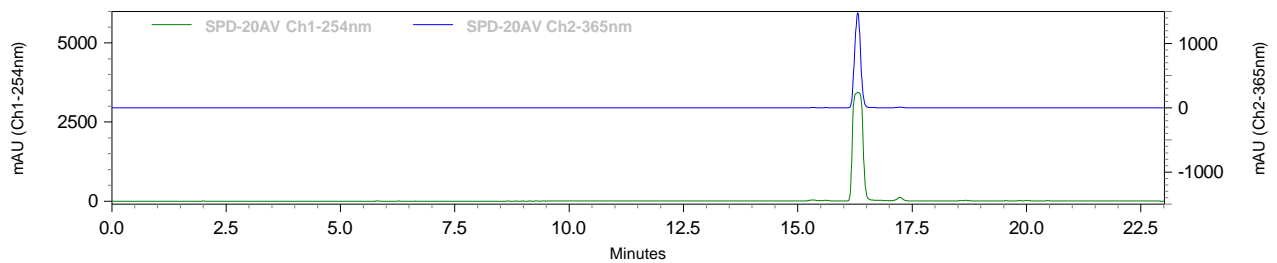

Zoomed View of Relevant Peaks

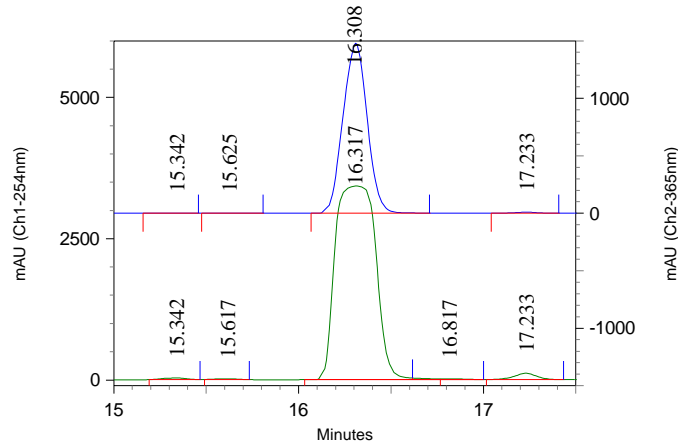

| Ch1-254nm      |               | Ch2-365nm      |               |
|----------------|---------------|----------------|---------------|
| Retention Time | Area %        | Retention Time | Area %        |
| 15.342         | 0.47          | 15.342         | 0.13          |
| 15.617         | 0.21          | 15.625         | 0.09          |
| 16.317         | 97.23         | 16.308         | 99.27         |
| 16.817         | 0.19          | 17.233         | 0.51          |
| 17.233         | 1.77          | <b>Total:</b>  | <b>100.00</b> |
| 18.675         | 0.14          |                |               |
| <b>Total:</b>  | <b>100.00</b> |                |               |

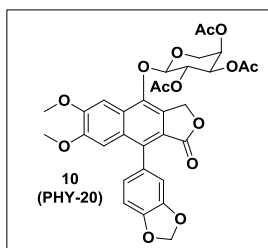

Method: % Methanol (w/ 0.1% formic acid) in Water (w/ 0.1% formic acid)

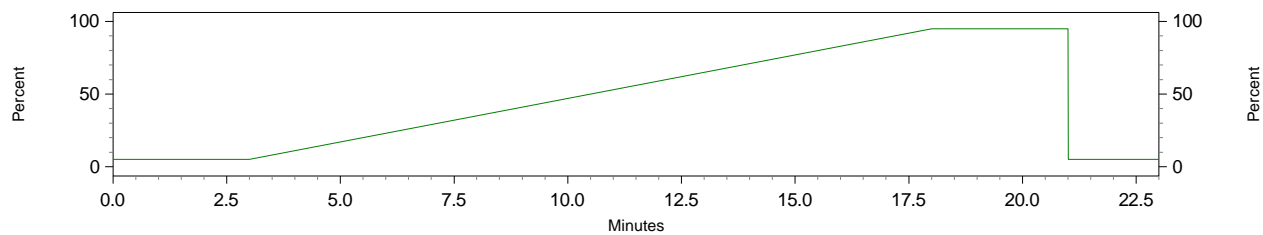

HPLC Trace (254 nm & 365 nm)

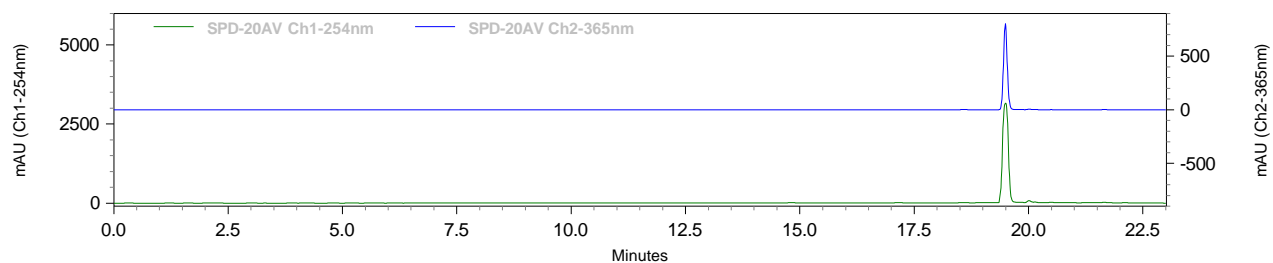

Zoomed View of Relevant Peaks

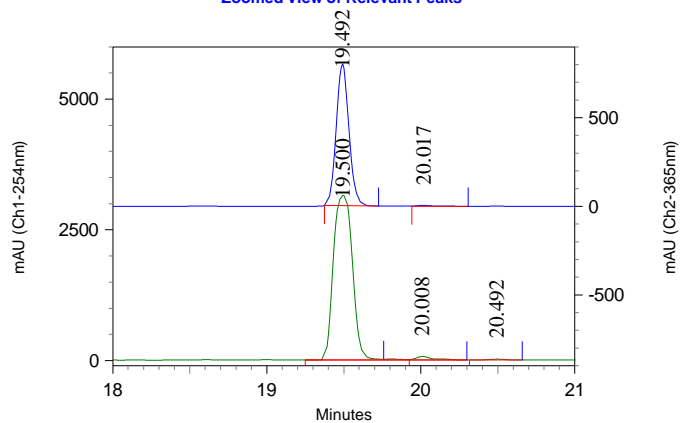

| <u>Ch1-254nm</u> |               | <u>Ch2-365nm</u> |               |
|------------------|---------------|------------------|---------------|
| Retention Time   | Area %        | Retention Time   | Area %        |
| 14.825           | 0.41          | 19.492           | 99.19         |
| 19.500           | 96.98         | 20.017           | 0.81          |
| 20.008           | 1.89          | <b>Total:</b>    | <b>100.00</b> |
| 20.492           | 0.41          |                  |               |
| 21.658           | 0.32          |                  |               |
| <b>Total:</b>    | <b>100.00</b> |                  |               |

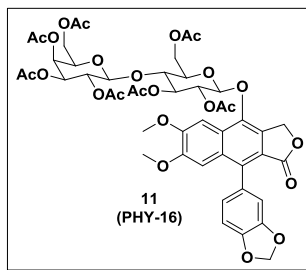

Method: % Methanol (w/ 0.1% formic acid) in Water (w/ 0.1% formic acid)

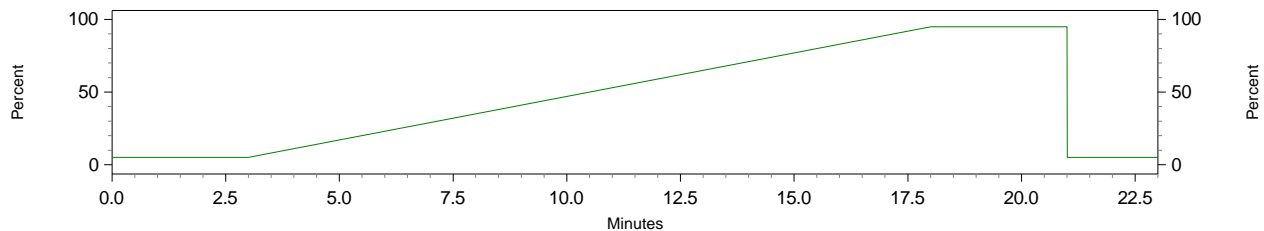

HPLC Trace (254 nm & 365 nm)

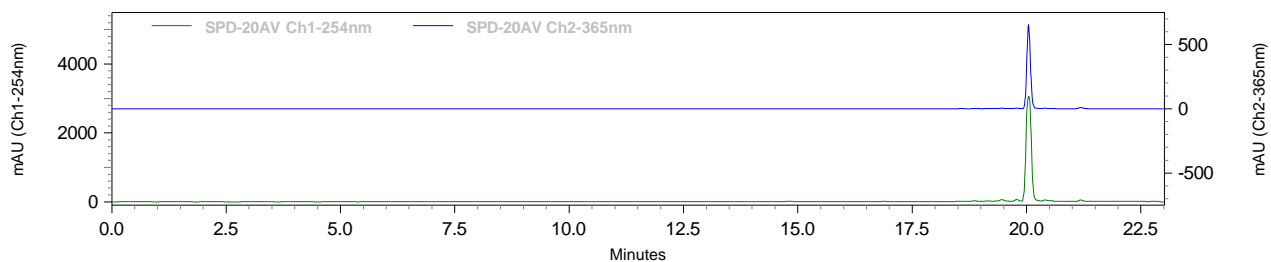

Zoomed View of Relevant Peaks

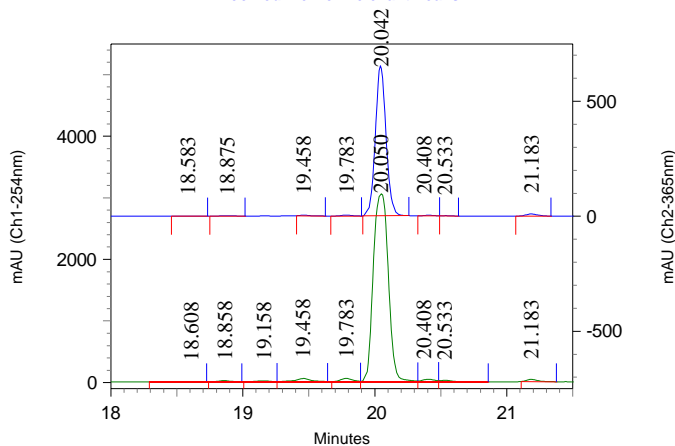

Ch1-254nm

| Retention Time | Area %        |
|----------------|---------------|
| 14.825         | 0.39          |
| 16.875         | 0.10          |
| 18.608         | 0.22          |
| 18.858         | 0.63          |
| 19.158         | 0.64          |
| 19.458         | 2.03          |
| 19.783         | 1.50          |
| 20.050         | 91.87         |
| 20.408         | 1.11          |
| 20.533         | 0.71          |
| 21.183         | 0.79          |
| <b>Total:</b>  | <b>100.00</b> |

Ch2-365nm

| Retention Time | Area %        |
|----------------|---------------|
| 18.583         | 0.12          |
| 18.875         | 0.29          |
| 19.458         | 0.33          |
| 19.783         | 0.56          |
| 20.042         | 96.76         |
| 20.408         | 0.31          |
| 20.533         | 0.10          |
| 21.183         | 1.52          |
| <b>Total:</b>  | <b>100.00</b> |

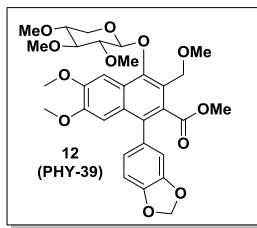

Method: % Methanol (w/ 0.1% formic acid) in Water (w/ 0.1% formic acid)

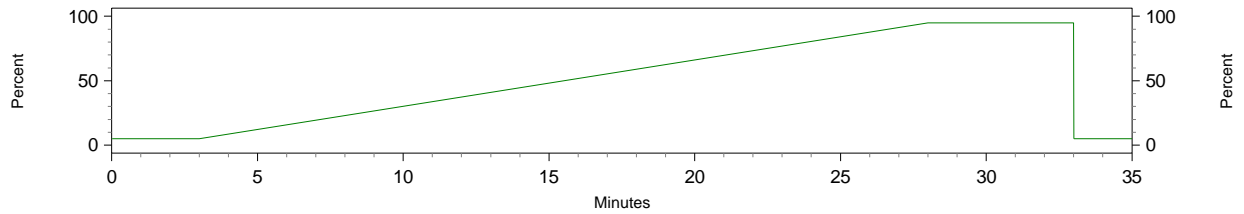

HPLC Trace (254 nm & 365 nm)

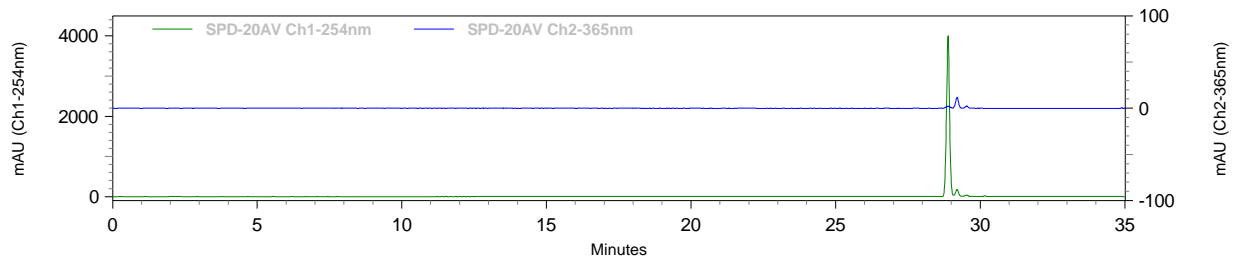

Zoomed View of Relevant Peaks

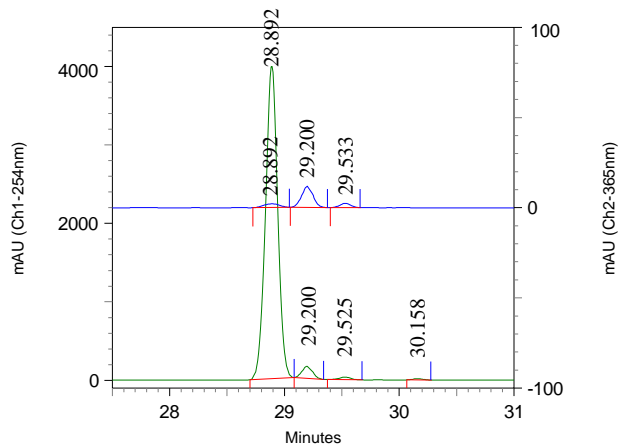

| Ch1-254nm      |               | Ch2-365nm      |               |
|----------------|---------------|----------------|---------------|
| Retention Time | Area %        | Retention Time | Area %        |
| 28.892         | 95.66         | 28.892         | 16.96         |
| 29.200         | 3.29          | 29.200         | 70.13         |
| 29.525         | 0.74          | 29.533         | 12.91         |
| 30.158         | 0.31          | <b>Total:</b>  | <b>100.00</b> |
| <b>Total:</b>  | <b>100.00</b> |                |               |



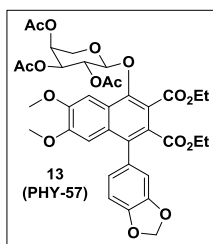

Method: % Methanol (w/ 0.1% formic acid) in Water (w/ 0.1% formic acid)

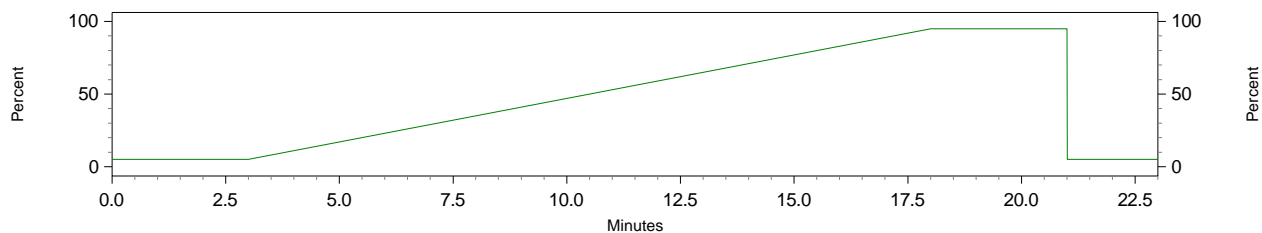

HPLC Trace (254 nm & 365 nm)

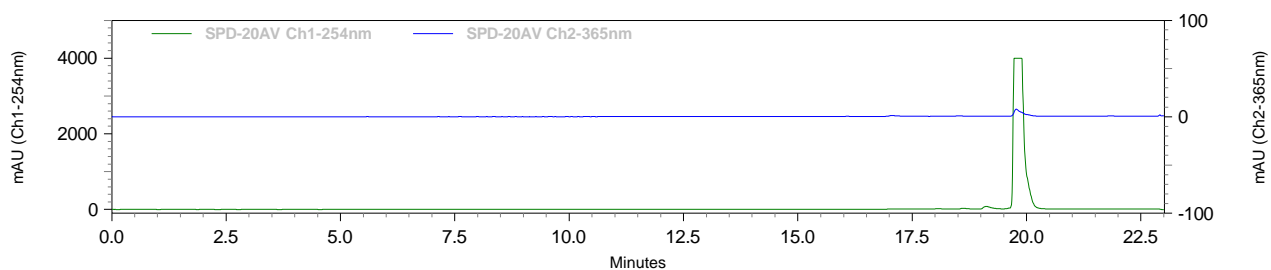

HPLC Trace (254 nm & 365 nm)

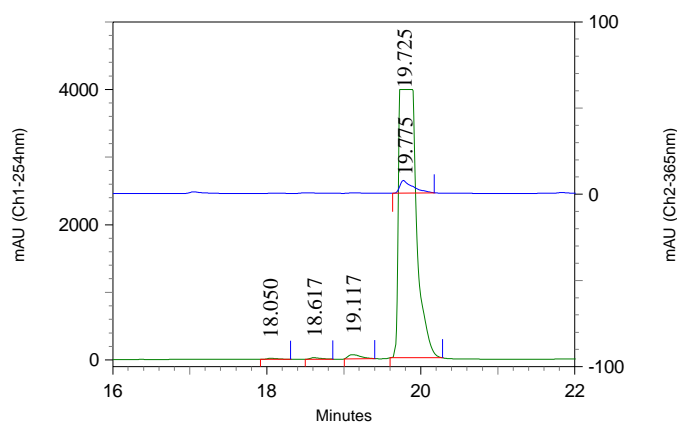

| <u>Ch1-254nm</u> |               | <u>Ch2-365nm</u> |               |
|------------------|---------------|------------------|---------------|
| Retention Time   | Area %        | Retention Time   | Area %        |
| 18.050           | 0.21          | 19.775           | 100.00        |
| 18.617           | 0.29          | <b>Total:</b>    | <b>100.00</b> |
| 19.117           | 1.04          |                  |               |
| 19.725           | 98.46         |                  |               |
| <b>Total:</b>    | <b>100.00</b> |                  |               |

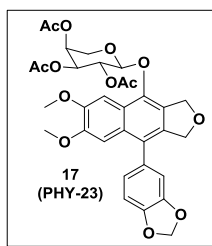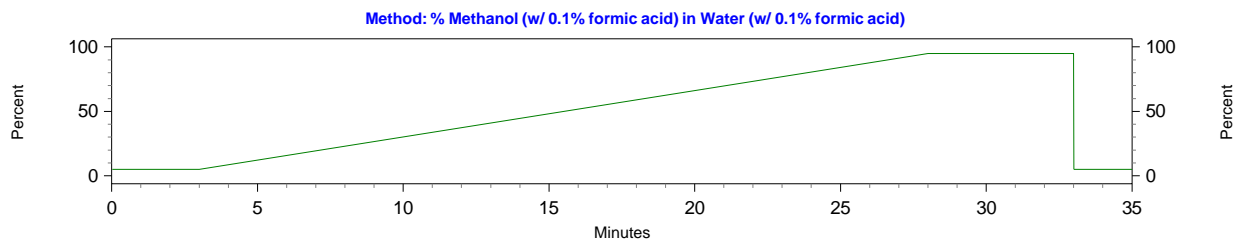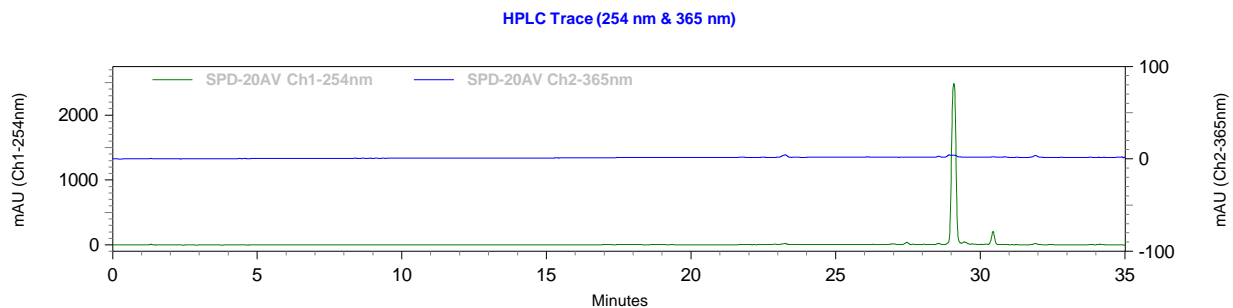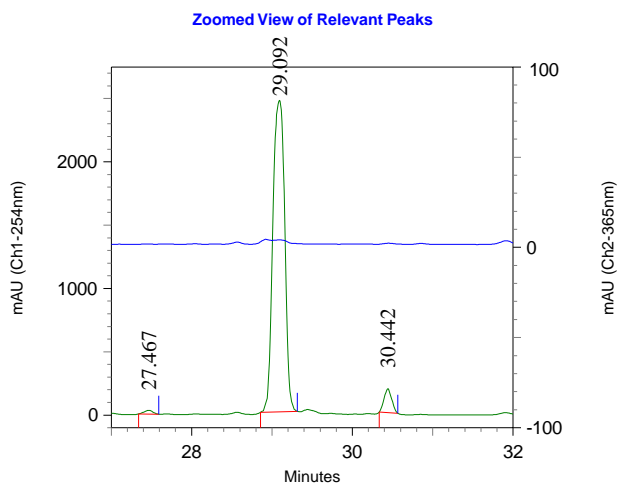

| <u>Ch1-254nm</u> |               | <u>Ch2-365nm</u> |        |
|------------------|---------------|------------------|--------|
| Retention Time   | Area %        | Retention Time   | Area % |
| 27.467           | 0.82          | ----             | ----   |
| 29.092           | 94.46         | ----             | ----   |
| 30.442           | 4.72          | ----             | ----   |
| <b>Total:</b>    | <b>100.00</b> |                  |        |

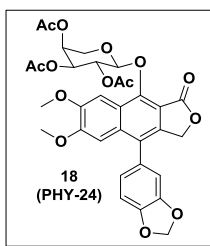

Method: % Methanol (w/ 0.1% formic acid) in Water (w/ 0.1% formic acid)

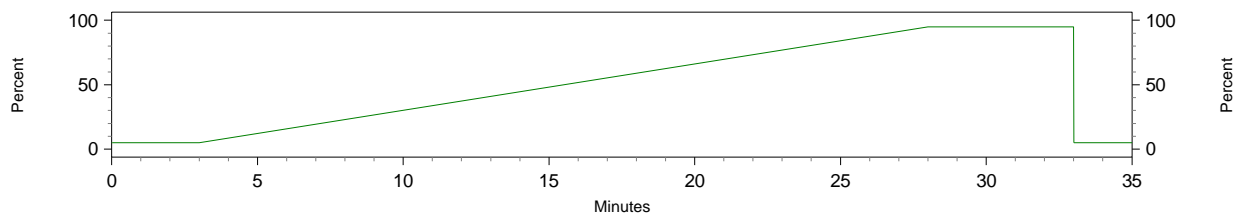

HPLC Trace (254 nm & 365 nm)

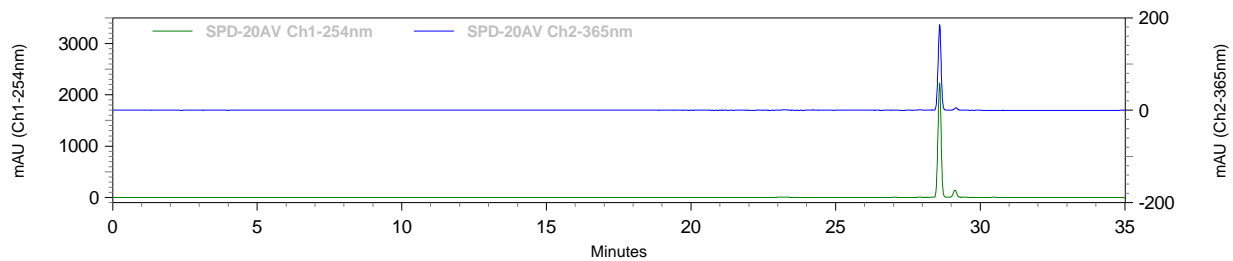

Zoomed View of Relevant Peaks

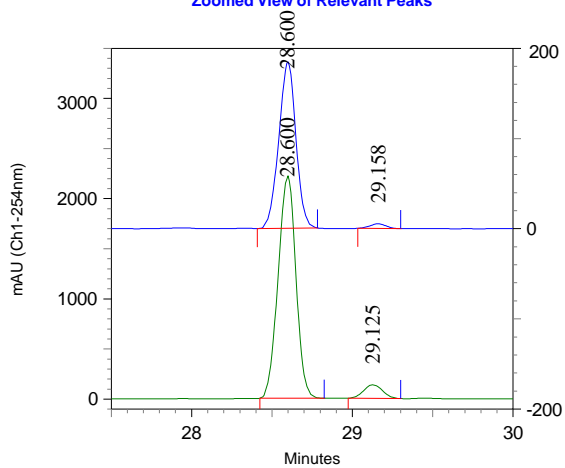

| Ch1-254nm      |               | Ch2-365nm      |               |
|----------------|---------------|----------------|---------------|
| Retention Time | Area %        | Retention Time | Area %        |
| 28.600         | 93.86         | 28.600         | 97.41         |
| 29.125         | 6.14          | 29.158         | 2.59          |
| <b>Total:</b>  | <b>100.00</b> | <b>Total:</b>  | <b>100.00</b> |
